# Supplementary material
Source: publisher figshare collection journal article supplement (https://geolsoc.figshare.com/ndownloader/files/26448470)
Supplement: Supplementary file 1 [file 26448470]

## Sheet: Supplementary material Dalslåen
Sample	magmatic/detrital	east	north
14BD_83	magmatic	(32)537922	6957800
15BD_828	magmatic	(32)537057	6955508
15BD_186	detrital	(32)543291	6956043
15BD_202	detrital	(32)542689	6957095
15BD_213	detrital	(32)542297	6957634
14BD_17	detrital	(32)538524	6958623
14BD_58	detrital	(32)538485	6959066
TGR_201	detrital	(32)537839	6944060
TGR_199	detrital	(32)537921	6943454
14BD_48	detrital	(32)530277	6939270
Sample	Point	ppm				Ratios							Discordance		Ages
		U	206Pb	206Pbc(%)	206/204	207Pb/206Pb*	1SE	207Pb/235U*	1SE	206Pb/238U*	1SE	Rho	Central (%)	Minimum rim (%)	207/206	1s	207/235	1s	206/238	1s
15BD_186	15BD186_64	262	19	0	6699	0.05593	0.00027	0.55764	0.0065	0.072308	0.000764	0.907	0.1	.	450	10	450	4	450	5
15BD_186	15BD186_59	156	11.4	0	5333	0.05642	0.0003	0.56538	0.00613	0.072683	0.000691	0.876	-3.6	.	469	11	455	4	452	4
15BD_186	15BD186_89	97	7.5	0	4321	0.05667	0.00035	0.58432	0.00774	0.074776	0.000874	0.882	-3	.	479	13	467	5	465	5
15BD_186	15BD186_175	194	12.5	0	5692	0.05628	0.0003	0.58755	0.00988	0.075715	0.001205	0.947	1.6	.	463	11	469	6	470	7
15BD_186	15BD186_101	92	6.9	0	2655	0.05709	0.00072	0.61698	0.01482	0.078379	0.001601	0.85	-1.8	.	495	27	488	9	486	10
15BD_186	15BD186_140	166	9.8	0	9194	0.05631	0.00042	0.60781	0.01065	0.078286	0.001238	0.903	4.8	.	465	16	482	7	486	7
15BD_186	15BD186_15	1345	92.3	0	58330	0.0571	0.00024	0.63826	0.0102	0.081071	0.00125	0.965	1.5	.	495	9	501	6	503	7
15BD_186	15BD186_144	155	9.5	0	5388	0.05751	0.00045	0.6502	0.01122	0.081994	0.001262	0.893	-0.7	.	511	16	509	7	508	8
15BD_186	15BD186_138	433	27.1	0	72121	0.05711	0.00042	0.65377	0.01105	0.08303	0.001266	0.902	3.9	.	496	16	511	7	514	8
15BD_186	15BD186_95	854	68.5	0	16594	0.05714	0.00066	0.65548	0.01568	0.083195	0.001747	0.878	3.8	.	497	24	512	10	515	10
15BD_186	15BD186_02	1775	144.6	0	44548	0.05727	0.00066	0.65807	0.01646	0.083343	0.001849	0.887	2.9	.	502	25	513	10	516	11
15BD_186	15BD186_185	578	41.3	0	9694	0.05806	0.0003	0.66935	0.01021	0.083607	0.001201	0.942	-2.9	.	532	10	520	6	518	7
15BD_186	15BD186_51	66	9.2	0	3175	0.06784	0.00053	1.37469	0.03715	0.146974	0.003799	0.957	2.5	.	864	16	878	16	884	21
15BD_186	15BD186_20	156	25.5	0	10990	0.07423	0.00049	1.73417	0.03548	0.169448	0.003283	0.947	-4	-0.3	1048	13	1021	13	1009	18
15BD_186	15BD186_24	45	7.4	0	3255	0.07226	0.00058	1.69508	0.0352	0.170137	0.003257	0.922	2.1	.	993	16	1007	13	1013	18
15BD_186	15BD186_83	591	104	0	54681	0.07386	0.00027	1.75576	0.01809	0.17241	0.001657	0.933	-1.3	.	1038	7	1029	7	1025	9
15BD_186	15BD186_110	122	17.1	0	7161	0.07403	0.00054	1.79452	0.03226	0.175805	0.00289	0.914	0.2	.	1042	14	1043	12	1044	16
15BD_186	15BD186_16	97	16.6	0	6084	0.07368	0.00051	1.80067	0.03701	0.177258	0.003434	0.943	2	.	1033	13	1046	13	1052	19
15BD_186	15BD186_177core	44	7.3	0	2828	0.07844	0.00048	2.09769	0.03783	0.193955	0.003291	0.941	-1.4	.	1158	12	1148	12	1143	18
15BD_186	15BD186_49	48	9.2	0	3417	0.07885	0.00053	2.12922	0.04241	0.195837	0.003668	0.94	-1.5	.	1168	13	1158	14	1153	20
15BD_186	15BD186_19	454	88.7	0	322374	0.07771	0.0005	2.16132	0.04527	0.201725	0.004018	0.951	4.3	.	1139	12	1169	15	1185	22
15BD_186	15BD186_143	40	6.2	0	6150	0.08175	0.00071	2.34229	0.04844	0.207815	0.003902	0.908	-2	.	1239	16	1225	15	1217	21
15BD_186	15BD186_161	215	39.4	0	28168	0.08063	0.00035	2.37298	0.03744	0.213439	0.003236	0.961	3.1	.	1213	8	1234	11	1247	17
15BD_186	15BD186_170	44	8.3	0	8218	0.085	0.00046	2.57416	0.04562	0.219646	0.003703	0.951	-3	-0.4	1316	11	1293	13	1280	20
15BD_186	15BD186_113	93	17	0	16615	0.0866	0.00066	2.7666	0.05299	0.231699	0.004069	0.917	-0.7	.	1352	14	1347	14	1343	21
15BD_186	15BD186_155	93	18.6	0	6712	0.08619	0.00045	2.75564	0.04542	0.231874	0.003626	0.949	0.1	.	1343	9	1344	12	1344	19
15BD_186	15BD186_171	113	23.5	0	11437	0.08995	0.00046	3.04544	0.05644	0.245563	0.004377	0.962	-0.7	.	1424	10	1419	14	1416	23
15BD_186	15BD186_179	133	30.1	0	8815	0.0921	0.00046	3.39773	0.06289	0.267577	0.004768	0.963	4.5	0.1	1469	9	1504	15	1528	24
15BD_186	15BD186_94	70	20.4	0	5799	0.10129	0.0014	3.96241	0.12063	0.283707	0.007693	0.891	-2.6	.	1648	25	1627	25	1610	39
15BD_186	15BD186_167	84	20.8	0	11475	0.10327	0.00055	4.1587	0.07726	0.292081	0.005198	0.958	-2.1	.	1684	9	1666	15	1652	26
15BD_186	15BD186_06	135	41.3	0	11342	0.10686	0.0015	4.37789	0.13609	0.29714	0.008236	0.892	-4.5	.	1746	25	1708	26	1677	41
15BD_186	15BD186_120	192	44.8	0	29129	0.10077	0.00079	4.16882	0.0849	0.30003	0.00564	0.923	3.7	.	1638	14	1668	17	1691	28
15BD_186	15BD186_37	152	45.7	0	14572	0.10748	0.00077	4.48635	0.10898	0.302736	0.007027	0.956	-3.4	-0.6	1757	13	1728	20	1705	35
15BD_186	15BD186_27	447	135.5	0	69941	0.10785	0.00076	4.53017	0.10787	0.304634	0.006927	0.955	-3.2	-0.5	1763	12	1737	20	1714	34
15BD_186	15BD186_162	195	51.7	0	51483	0.10306	0.0005	4.40119	0.08116	0.309717	0.005511	0.965	4	.	1680	9	1713	15	1739	27
15BD_186	15BD186_65	307	96.1	0	28783	0.11015	0.00048	4.73577	0.05705	0.311809	0.003503	0.933	-3.3	-1.7	1802	8	1774	10	1750	17
15BD_186	15BD186_105	131	42.1	0	13130	0.11034	0.00162	4.76012	0.1541	0.312887	0.009034	0.892	-3.2	.	1805	26	1778	27	1755	44
15BD_186	15BD186_130	104	25.8	0	19129	0.11369	0.00096	5.06683	0.10925	0.323218	0.006408	0.919	-3.3	-0.2	1859	15	1831	18	1805	31
15BD_186	15BD186_10	115	38.4	0	13986	0.11563	0.00089	5.34209	0.13676	0.335087	0.00818	0.954	-1.6	.	1890	13	1876	22	1863	39
15BD_186	15BD186_42	162	54.9	0	13315	0.11806	0.00089	5.48053	0.13712	0.336689	0.008032	0.953	-3.4	-0.6	1927	12	1898	21	1871	39
15BD_186	15BD186_158	63	19	0	16126	0.11483	0.00065	5.59389	0.11006	0.353318	0.006659	0.958	4.5	.	1877	10	1915	17	1950	32
15BD_186	15BD186_09	167	50.4	0	18836	0.11681	0.00062	5.81203	0.12103	0.360864	0.007263	0.967	4.8	.	1908	9	1948	18	1986	34
15BD_186	15BD186_92	82	24.7	0	14672	0.11858	0.00065	5.9032	0.12462	0.361059	0.007358	0.965	3.1	.	1935	10	1962	18	1987	35
15BD_186	15BD186_123	29	8.5	0	12984	0.12933	0.0012	6.86049	0.16117	0.384716	0.008307	0.919	0.5	.	2089	15	2094	21	2098	39
15BD_186	15BD186_172	15	6.3	0	2922	0.16807	0.00119	11.5083	0.29938	0.496601	0.012434	0.963	2.9	.	2539	11	2565	24	2599	54
15BD_186	15BD186_126	115	44.3	0	21480	0.18667	0.00212	12.9116	0.35711	0.501663	0.012657	0.912	-4.1	-0.8	2713	19	2673	26	2621	54
15BD_186	15BD186_30	227	118.9	0	59881	0.19016	0.0019	13.2739	0.44507	0.506261	0.016205	0.955	-4.6	-1.7	2744	16	2699	32	2641	69
15BD_186	15BD186_66	96	48.4	0	20522	0.18712	0.00107	13.0645	0.20221	0.506363	0.007284	0.929	-3.4	-1.7	2717	9	2684	15	2641	31
15BD_186	15BD186_136	84	33.1	0	10712	0.1994	0.00239	14.4643	0.40639	0.526106	0.013374	0.905	-4.2	-0.8	2821	19	2781	27	2725	56
15BD_186	15BD186_137	120	47.6	0	35162	0.19884	0.00237	14.5331	0.40909	0.530097	0.013518	0.906	-3.3	.	2817	19	2785	27	2742	57
15BD_186	15BD186_159	26	11.6	0	4167	0.18373	0.00133	13.6033	0.35461	0.536978	0.013445	0.96	3.8	.	2687	11	2722	25	2771	56
15BD_186	15BD186_131	133	55.1	0	41544	0.18846	0.00215	14.0451	0.39694	0.540499	0.013972	0.915	2.6	.	2729	18	2753	27	2786	58
15BD_186	15BD186_180	42	19.1	0	9560	0.18415	0.00134	13.7871	0.35856	0.542993	0.013559	0.96	4.8	.	2691	11	2735	25	2796	57
15BD_186	15BD186_173	76	34.7	0	11704	0.19466	0.00146	14.5781	0.39108	0.543155	0.013987	0.96	0.7	.	2782	11	2788	25	2797	58
15BD_186	15BD186_117	45	19.8	0	11700	0.20196	0.00245	15.7979	0.481	0.567317	0.015844	0.917	2.4	.	2842	19	2865	29	2897	65
15BD_186	15BD186_146	56	24	0	16237	0.21109	0.00264	16.8398	0.49677	0.5786	0.015465	0.906	1.2	.	2914	20	2926	28	2943	63
15BD_186	15BD186_12	110	53.1	0	23225	0.20404	0.00155	16.337	0.4445	0.580698	0.015172	0.96	4	.	2859	12	2897	26	2952	62
15BD_186	15BD186_112	22	10.3	0	4624	0.22247	0.00295	18.09	0.57844	0.589761	0.01716	0.91	-0.4	.	2999	20	2995	31	2988	70
15BD_186	15BD186_76	230	17.1	0	8006	0.05682	0.00031	0.57133	0.00679	0.072927	0.000773	0.892	-6.6	-1.2	485	12	459	4	454	5
15BD_186	15BD186_128	142	8.5	0	4851	0.05581	0.00043	0.59861	0.01011	0.077786	0.001165	0.887	8.8	0.2	445	17	476	6	483	7
15BD_186	15BD186_35	977	78.5	0	25771	0.05682	0.00034	0.65627	0.01184	0.08377	0.001427	0.945	7.3	0.5	485	13	512	7	519	8
15BD_186	15BD186_58	86	14	0	7721	0.07379	0.00036	1.65638	0.01972	0.162792	0.001766	0.911	-6.6	-4	1036	10	992	8	972	10
15BD_186	15BD186_177rim	31	5	0	2249	0.08109	0.0007	2.12827	0.04053	0.190345	0.003233	0.892	-8.9	-5.1	1224	16	1158	13	1123	18
15BD_186	15BD186_29	512	95.9	0	40769	0.07492	0.00046	1.98797	0.03983	0.192436	0.003667	0.951	7	2.1	1066	12	1111	14	1135	20
15BD_186	15BD186_54	137	26.8	0	9731	0.08306	0.00044	2.25864	0.03186	0.19722	0.002583	0.928	-9.5	-7.2	1271	10	1199	10	1160	14
15BD_186	15BD186_03	109	21.5	0	6413	0.08376	0.00064	2.36039	0.05166	0.204383	0.00419	0.937	-7.5	-4	1287	14	1231	16	1199	22
15BD_186	15BD186_156	303	58	0	17267	0.088	0.0004	2.69334	0.04422	0.221968	0.003505	0.962	-7.2	-5.3	1383	8	1327	12	1292	18
15BD_186	15BD186_103	379	85	0	52706	0.0876	0.00116	2.71404	0.07651	0.2247	0.005595	0.883	-5.4	.	1374	25	1332	21	1307	29
15BD_186	15BD186_01	145	34.3	0	12299	0.09285	0.00123	3.00229	0.08416	0.234503	0.005799	0.882	-9.5	-4.3	1485	25	1408	21	1358	30
15BD_186	15BD186_39	155	37.2	0	58464	0.09599	0.00065	3.2426	0.0758	0.245008	0.005479	0.957	-9.7	-7	1548	12	1467	18	1413	28
15BD_186	15BD186_142	109	22.7	0	17715	0.09424	0.00077	3.61434	0.07331	0.278151	0.00517	0.916	5.1	0.6	1513	15	1553	16	1582	26
15BD_186	15BD186_05	290	86.8	0	32628	0.11509	0.0006	5.65378	0.11555	0.356292	0.007042	0.967	5.1	0.3	1881	9	1924	18	1965	33
15BD_186	15BD186_183	148	44.5	0	16162	0.11421	0.00059	5.62413	0.11261	0.357134	0.006905	0.966	6.3	1.5	1868	9	1920	17	1969	33
15BD_186	15BD186_80	51	20.7	0	7901	0.14955	0.0008	8.30182	0.11735	0.402608	0.00527	0.926	-8	-6.4	2341	9	2265	13	2181	24
15BD_186	15BD186_25	71	29.6	0	10046	0.15144	0.00131	8.61402	0.24697	0.41253	0.011275	0.953	-6.8	-4.1	2362	14	2298	26	2226	51
15BD_186	15BD186_45	97	43.9	0	20827	0.16753	0.00152	10.1737	0.30045	0.440428	0.012378	0.952	-8.5	-5.9	2533	15	2451	27	2353	55
15BD_186	15BD186_100	187	96.6	0	26114	0.18435	0.00367	11.9863	0.53116	0.471558	0.018672	0.894	-9	-3.5	2692	32	2603	42	2490	82
15BD_186	15BD186_90	246	119.7	0	4862	0.18763	0.0011	12.3529	0.19218	0.477502	0.006879	0.926	-9.1	-7.5	2721	9	2632	15	2516	30
15BD_186	15BD186_88	216	88	0	35672	0.18734	0.00134	12.5918	0.31034	0.487476	0.011494	0.957	-7.1	-5	2719	11	2650	23	2560	50
15BD_186	15BD186_50	57	28.9	0	17135	0.18752	0.00183	12.6758	0.40837	0.490272	0.015055	0.953	-6.6	-3.8	2720	16	2656	30	2572	65
15BD_186	15BD186_48	48	24.7	0	9135	0.18542	0.0018	12.6398	0.41322	0.494391	0.015434	0.955	-5	-2.2	2702	16	2653	31	2590	67
15BD_186	15BD186_08	77	39.6	0	17979	0.18907	0.00192	13.0091	0.43571	0.49903	0.015928	0.953	-5.5	-2.6	2734	16	2680	32	2610	68
15BD_186	15BD186_106	114	63.1	0	55292	0.19825	0.00419	13.6497	0.64036	0.499345	0.020911	0.893	-8.7	-9.5	2812	34	2726	44	2611	90
15BD_186	15BD186_23	87	45	0	21436	0.19156	0.00194	13.2777	0.44492	0.502711	0.016057	0.953	-5.7	-2.8	2756	16	2700	32	2625	69
15BD_186	15BD186_38	70	36.9	0	16434	0.19271	0.00194	13.4969	0.45624	0.507968	0.016389	0.954	-5.2	-2.3	2765	17	2715	32	2648	70
15BD_186	15BD186_149	94	41	0	15383	0.16926	0.00114	11.9097	0.34167	0.510317	0.014232	0.972	5.2	.	2550	11	2597	27	2658	61
15BD_186	15BD186_178	59	25.7	0	9526	0.19789	0.00147	14.0647	0.35931	0.51546	0.012598	0.957	-5.6	-3.5	2809	12	2754	24	2680	54
15BD_186	15BD186_150	104	48.6	0	14644	0.18313	0.0013	13.8338	0.42412	0.54788	0.016339	0.973	6.2	.	2681	11	2738	29	2816	68
15BD_186	15BD186_187	49	23.3	0	9300	0.1937	0.00144	15.1958	0.42708	0.568968	0.015423	0.964	5.8	.	2774	12	2828	27	2904	63
15BD_186	15BD186_147	52	24.5	0	12142	0.21818	0.0028	19.2797	0.60312	0.64089	0.018288	0.912	9.6	2.6	2967	21	3056	30	3193	72
15BD_186	15BD186_34	111	63	0	21121	0.25527	0.00235	24.1496	0.74662	0.686129	0.020253	0.955	6	.	3218	15	3274	30	3368	77
15BD_186	15BD186_40	744	60.9	0	13295	0.05668	0.00032	0.66531	0.01198	0.085129	0.001456	0.95	10.3	3.5	479	12	518	7	527	9
15BD_186	15BD186_133	248	15	0	12893	0.05594	0.00043	0.61537	0.01041	0.079777	0.001198	0.888	10.3	1.6	450	17	487	7	495	7
15BD_186	15BD186_122	81	17.8	0	9383	0.08735	0.0007	3.42075	0.06967	0.284029	0.005321	0.92	20.1	14.7	1368	14	1509	16	1612	27
15BD_186	15BD186_118	1032	85.2	0	915	0.13239	0.00146	1.92939	0.0368	0.105698	0.001645	0.816	-73	-72.1	2130	19	1091	13	648	10
15BD_186	15BD186_132	550	46.1	0	419	0.12341	0.00126	1.87541	0.03844	0.110213	0.001959	0.867	-69.8	-68.7	2006	18	1072	14	674	11
15BD_186	15BD186_77	277	41.7	0	1612	0.1409	0.00149	2.80577	0.06729	0.144423	0.003107	0.897	-65.2	-64	2238	18	1357	18	870	17
15BD_186	15BD186_21	786	108.1	0	212	0.13559	0.00139	2.66051	0.06497	0.142309	0.003155	0.908	-64.5	-63.2	2172	17	1318	18	858	18
15BD_186	15BD186_119	223	37.3	0	4693	0.17686	0.0023	5.28399	0.16023	0.21669	0.005934	0.903	-56.9	-55.1	2624	21	1866	26	1264	31
15BD_186	15BD186_104	417	92.2	0	3442	0.16192	0.00309	4.98548	0.16269	0.223315	0.005906	0.81	-52.3	-49.6	2476	31	1817	28	1299	31
15BD_186	15BD186_78	219	33.8	0	2993	0.10378	0.00074	2.17348	0.03606	0.151894	0.002276	0.903	-49.4	-48	1693	12	1173	12	912	13
15BD_186	15BD186_73	306	81.8	0	7067	0.17292	0.00101	6.20563	0.10737	0.260273	0.004238	0.941	-47.3	-46.3	2586	10	2005	15	1491	22
15BD_186	15BD186_36	401	149.6	0	22511	0.28919	0.0041	14.8067	0.45742	0.371336	0.010192	0.888	-46.8	-44.8	3413	22	2803	29	2036	48
15BD_186	15BD186_108	485	132.7	0	2360	0.17867	0.00351	6.66478	0.22426	0.270545	0.007388	0.812	-46.6	-43.6	2641	32	2068	30	1544	37
15BD_186	15BD186_68	248	66.9	0	1045	0.17324	0.00101	6.32185	0.1088	0.26467	0.004284	0.94	-46.5	-45.5	2589	9	2021	15	1514	22
15BD_186	15BD186_124	288	63.9	0	12440	0.18917	0.00218	7.50516	0.16888	0.287741	0.00556	0.859	-45.6	-43.7	2735	18	2174	20	1630	28
15BD_186	15BD186_107	428	75.7	0	3880	0.10373	0.00152	2.59301	0.0793	0.181296	0.00487	0.878	-39.6	-36.1	1692	26	1299	22	1074	27
15BD_186	15BD186_52	111	34.7	0	4112	0.18207	0.00114	7.88065	0.12424	0.313925	0.004544	0.918	-38.9	-37.7	2672	10	2217	14	1760	22
15BD_186	15BD186_43	179	26.1	0	40193	0.08809	0.00067	1.83117	0.04742	0.150758	0.003731	0.956	-37.1	-34.8	1385	14	1057	17	905	21
15BD_186	15BD186_157	402	111.1	0	23812	0.17339	0.00117	7.71301	0.1578	0.322628	0.006233	0.944	-34.8	-33.4	2591	11	2198	18	1803	30
15BD_186	15BD186_13	783	155.9	0	1844	0.10677	0.00078	2.98645	0.06668	0.202858	0.004281	0.945	-34.7	-32.9	1745	13	1404	17	1191	23
15BD_186	15BD186_67	135	48.4	0	13294	0.19452	0.00117	9.59264	0.13524	0.35766	0.004562	0.905	-33.7	-32.5	2781	9	2396	13	1971	22
15BD_186	15BD186_28	250	18.7	0	4292	0.06301	0.00057	0.68166	0.01319	0.078467	0.001343	0.885	-32.5	-27.8	708	18	528	8	487	8
15BD_186	15BD186_121	120	7.5	0	4961	0.06323	0.00091	0.70292	0.01452	0.080626	0.001198	0.719	-31.4	-24.2	716	29	541	9	500	7
15BD_186	15BD186_62	107	39.4	0	12570	0.18245	0.00109	9.2505	0.13149	0.367722	0.004745	0.908	-28.5	-27.2	2675	9	2363	13	2019	22
15BD_186	15BD186_14	794	156.3	0	3478	0.10951	0.00055	3.50878	0.06742	0.232372	0.004309	0.965	-27.5	-26	1791	9	1529	15	1347	23
15BD_186	15BD186_154	131	42	0	13291	0.18211	0.00127	9.38915	0.22891	0.373939	0.008738	0.959	-27.2	-25.6	2672	11	2377	22	2048	41
15BD_186	15BD186_70	72	30.1	0	991	0.2096	0.00242	12.0223	0.22754	0.415993	0.006243	0.793	-26.9	-24.6	2902	18	2606	18	2242	28
15BD_186	15BD186_163	82	5.6	0	1681	0.0614	0.00051	0.67062	0.01041	0.079214	0.001039	0.846	-25.7	-20.8	653	17	521	6	491	6
15BD_186	15BD186_116	561	66.9	0	8376	0.07837	0.00056	1.62329	0.03067	0.150222	0.00263	0.927	-23.5	-20.7	1156	14	979	12	902	15
15BD_186	15BD186_55	102	26.4	0	9595	0.11374	0.00058	4.1432	0.08144	0.26419	0.005017	0.966	-21	-19.5	1860	9	1663	16	1511	26
15BD_186	15BD186_102	35	15.1	0	5565	0.1826	0.00366	10.2434	0.41426	0.406847	0.014295	0.869	-21	-16.2	2677	32	2457	37	2200	66
15BD_186	15BD186_47	457	77	0	14533	0.08161	0.0005	1.93951	0.03968	0.172368	0.003364	0.954	-18.5	-15.9	1236	12	1095	14	1025	18
15BD_186	15BD186_141	93	31	0	6261	0.18882	0.00219	11.5248	0.302	0.442662	0.010404	0.897	-16.1	-13.2	2732	19	2567	24	2363	46
15BD_186	15BD186_168	132	47.3	0	9413	0.18229	0.00126	10.8391	0.26764	0.431246	0.010226	0.96	-16.1	-14.3	2674	11	2509	23	2311	46
15BD_186	15BD186_186	27	3.6	0	1148	0.07586	0.00055	1.62438	0.03184	0.155299	0.002826	0.928	-15.8	-12.4	1091	14	980	12	931	16
15BD_186	15BD186_82	92	39.1	0	15258	0.17374	0.00098	10.09	0.15115	0.421197	0.005849	0.927	-15	-13.5	2594	9	2443	14	2266	27
15BD_186	15BD186_63	62	15.2	0	4617	0.099	0.00046	3.32589	0.03956	0.243648	0.002669	0.921	-13.8	-12.2	1605	8	1487	9	1406	14
15BD_186	15BD186_160	210	33.2	0	2379	0.08129	0.00085	2.06457	0.03736	0.184193	0.002713	0.814	-12.3	-8	1229	20	1137	12	1090	15
15BD_186	15BD186_61	119	33.7	0	41132	0.1094	0.00054	4.24827	0.05958	0.281646	0.003701	0.937	-12	-10.3	1789	9	1683	12	1600	19
15BD_186	15BD186_151	144	56.3	0	15179	0.18473	0.00128	11.6826	0.27004	0.458662	0.010115	0.954	-11.7	-9.8	2696	11	2579	22	2434	45
15BD_186	15BD186_46	201	60.3	0	12593	0.11499	0.00082	4.74265	0.10981	0.299126	0.006589	0.951	-11.6	-9.3	1880	12	1775	19	1687	33
15BD_186	15BD186_57	171	52.1	0	16918	0.11669	0.00058	4.89876	0.0632	0.30447	0.003621	0.922	-11.5	-9.9	1906	9	1802	11	1713	18
15BD_186	15BD186_134	91	33.2	0	12467	0.19659	0.00233	13.1177	0.41318	0.48395	0.014119	0.926	-11	-7.8	2798	19	2688	30	2544	61
15BD_186	excluded_15BD186_152	14	2.2	0	764	0.07459	0.00071	1.84343	0.03653	0.179244	0.00311	0.876	0.6	.	1057	19	1061	13	1063	17
15BD_186	excluded_15BD186_148	27	3.6	0	1547	0.07682	0.00069	1.92138	0.03684	0.181399	0.003067	0.882	-4.1	.	1117	18	1089	13	1075	17
15BD_202	15BD_202-232	199	17.6	0	192	0.05627	0.00034	0.58948	0.01438	0.075977	0.001796	0.969	2	.	463	13	471	9	472	11
15BD_202	15BD_202-168	276	16.6	0	327	0.05642	0.00027	0.60994	0.01189	0.078405	0.001482	0.97	3.9	.	469	10	484	7	487	9
15BD_202	15BD_202-154	266	16.1	0	351	0.05656	0.00027	0.61099	0.01069	0.078343	0.001319	0.962	2.6	.	475	10	484	7	486	8
15BD_202	15BD_202-97	841	55.6	0	842	0.0569	0.00024	0.61565	0.01314	0.078475	0.001643	0.981	-0.1	.	488	9	487	8	487	10
15BD_202	15BD_202-100	1079	71.2	0	1394	0.0572	0.00023	0.61973	0.0117	0.078573	0.001448	0.976	-2.5	.	499	9	490	7	488	9
15BD_202	15BD_202-135b	549	34.5	0	915	0.05745	0.00025	0.6298	0.00916	0.079505	0.001105	0.956	-3.2	.	509	9	496	6	493	7
15BD_202	15BD_202-110	21	2.7	0	44	0.0707	0.00064	1.5092	0.02981	0.15481	0.002713	0.887	-2.4	.	949	18	934	12	928	15
15BD_202	15BD_202-117	150	20.1	0	355	0.07225	0.00034	1.59947	0.0267	0.160567	0.002574	0.961	-3.6	-0.9	993	9	970	10	960	14
15BD_202	15BD_202-17	124	21.5	0	476	0.07252	0.0006	1.65089	0.02121	0.1651	0.001617	0.763	-1.7	.	1001	17	990	8	985	9
15BD_202	15BD_202-136	70	9.7	0	335	0.07438	0.0004	1.7413	0.02909	0.169795	0.002688	0.948	-4.2	-1.3	1052	10	1024	11	1011	15
15BD_202	15BD_202-193	123	25.3	0	270	0.07475	0.00048	1.80695	0.04842	0.175311	0.004563	0.971	-2.1	.	1062	12	1048	18	1041	25
15BD_202	15BD_202-14	107	19.6	0	415	0.07474	0.00062	1.79576	0.02286	0.174258	0.00168	0.757	-2.7	.	1062	16	1044	8	1036	9
15BD_202	15BD_202-102	53	8.3	0	161	0.07593	0.00041	1.90979	0.032	0.182417	0.002893	0.946	-1.3	.	1093	10	1085	11	1080	16
15BD_202	15BD_202-82	282	51.7	0	839	0.076	0.00214	1.99344	0.07659	0.190232	0.004974	0.681	2.7	.	1095	54	1113	26	1123	27
15BD_202	15BD_202-131	298	45.2	0	1156	0.07608	0.00033	1.94339	0.03152	0.18527	0.002894	0.963	-0.1	.	1097	9	1096	11	1096	16
15BD_202	15BD_202-04	359	72.2	0	1454	0.07711	0.00063	2.02903	0.02597	0.190848	0.001886	0.772	0.2	.	1124	16	1125	9	1126	10
15BD_202	15BD_202-190	144	33.1	0	363	0.07856	0.00049	2.0998	0.0519	0.193861	0.004637	0.968	-1.8	.	1161	12	1149	17	1142	25
15BD_202	15BD_202-213	164	38.2	0	411	0.07874	0.00046	2.1	0.05096	0.197362	0.004552	0.97	-0.4	.	1166	11	1163	16	1161	25
15BD_202	15BD_202-28	48	10	0	201	0.07893	0.00072	2.12885	0.03237	0.195621	0.00238	0.8	-1.7	.	1170	17	1158	11	1152	13
15BD_202	15BD_202-37	21	4.3	0	55	0.0789	0.00079	2.09078	0.03285	0.192178	0.002331	0.772	-3.4	.	1170	20	1146	11	1133	13
15BD_202	15BD_202-40	92	19.9	0	253	0.08128	0.00075	2.28459	0.03301	0.203866	0.00227	0.771	-2.9	.	1228	18	1208	10	1196	12
15BD_202	15BD_202-83	471	100.1	0	2048	0.08177	0.00237	2.46076	0.09834	0.21827	0.005994	0.687	2.9	.	1240	56	1261	29	1273	32
15BD_202	15BD_202-75	141	29.5	0	492	0.08232	0.00235	2.43486	0.09569	0.214516	0.005781	0.686	0	.	1253	54	1253	28	1253	31
15BD_202	15BD_202-20	338	74.3	0	1605	0.08253	0.0007	2.35765	0.03455	0.207198	0.002474	0.815	-3.9	-0.2	1258	16	1230	10	1214	13
15BD_202	15BD_202-120	102	19.2	0	328	0.08558	0.0004	2.59301	0.04829	0.219743	0.003961	0.968	-4	-1.9	1329	9	1299	14	1281	21
15BD_202	15BD_202-133	222	41.7	0	940	0.08713	0.0004	2.72501	0.04629	0.226839	0.003709	0.963	-3.7	-1.6	1363	9	1335	13	1318	19
15BD_202	15BD_202-122	67	12.9	0	227	0.08729	0.00051	2.72586	0.05106	0.226482	0.004028	0.95	-4.1	-1.5	1367	10	1336	14	1316	21
15BD_202	15BD_202-229	246	67.6	0	912	0.08859	0.00054	2.81949	0.0703	0.230838	0.005582	0.97	-4.5	-1.8	1395	11	1361	19	1339	29
15BD_202	15BD_202-152	328	65	0	1206	0.09186	0.00043	3.08721	0.05827	0.243757	0.004455	0.968	-4.4	-2.4	1464	9	1430	14	1406	23
15BD_202	15BD_202-34	404	109	0	1665	0.09193	0.00084	3.18477	0.04907	0.251271	0.003112	0.804	-1.6	.	1466	17	1453	12	1445	16
15BD_202	15BD_202-195	125	37.9	0	382	0.09242	0.0006	3.25555	0.08236	0.255474	0.006249	0.967	-0.7	.	1476	12	1471	20	1467	32
15BD_202	15BD_202-02	191	52	0	750	0.09296	0.00082	3.27659	0.04559	0.255638	0.002756	0.775	-1.5	.	1487	16	1476	11	1467	14
15BD_202	15BD_202-15	206	58.2	0	1372	0.09478	0.00085	3.46935	0.04925	0.265466	0.002921	0.775	-0.4	.	1524	16	1520	11	1518	15
15BD_202	15BD_202-89	349	93.3	0	1574	0.0988	0.00317	3.6638	0.16191	0.26895	0.008187	0.689	-4.6	.	1602	59	1564	35	1535	42
15BD_202	15BD_202-70	233	64.6	0	816	0.09944	0.00308	3.80779	0.16398	0.277721	0.008305	0.694	-2.4	.	1614	56	1594	35	1580	42
15BD_202	15BD_202-55	451	126.2	0	2686	0.09956	0.00302	3.79889	0.16155	0.276745	0.008261	0.702	-2.9	.	1616	52	1593	34	1575	42
15BD_202	15BD_202-153	92	20.9	0	471	0.10022	0.0005	3.87267	0.07246	0.280259	0.005056	0.964	-2.5	-0.5	1628	9	1608	15	1593	25
15BD_202	15BD_202-235	39	13.2	0	144	0.10164	0.00074	3.95463	0.11251	0.282193	0.007758	0.966	-3.5	-0.6	1654	13	1625	23	1602	39
15BD_202	15BD_202-44	104	31.5	0	567	0.1018	0.001	3.94557	0.0612	0.281104	0.003385	0.776	-4.1	-0.8	1657	17	1623	13	1597	17
15BD_202	15BD_202-29	208	65.8	0	1192	0.10242	0.00098	4.10494	0.06561	0.29068	0.003724	0.802	-1.6	.	1668	17	1655	13	1645	19
15BD_202	15BD_202-51	230	74.8	0	1586	0.10561	0.00105	4.36794	0.07026	0.299952	0.003786	0.785	-2.2	.	1725	18	1706	13	1691	19
15BD_202	15BD_202-58	396	122.5	0	2370	0.10589	0.00334	4.43111	0.19791	0.303492	0.009605	0.709	-1.4	.	1730	56	1718	37	1709	48
15BD_202	15BD_202-08	156	50.5	0	1154	0.10741	0.00101	4.49416	0.06644	0.303466	0.003459	0.771	-3.1	.	1756	16	1730	12	1708	17
15BD_202	15BD_202-220	83	31.1	0	371	0.11096	0.00075	4.74577	0.13352	0.310191	0.008474	0.971	-4.6	-2.2	1815	12	1775	24	1742	42
15BD_202	15BD_202-214	84	32.8	0	375	0.11249	0.00075	5.01717	0.14281	0.323479	0.008949	0.972	-2.1	.	1840	12	1822	24	1807	44
15BD_202	15BD_202-188	186	69.9	0	972	0.11344	0.00112	5.01962	0.18823	0.320914	0.011606	0.964	-3.8	-0.1	1855	17	1823	32	1794	57
15BD_202	15BD_202-211	94	38	0	387	0.11642	0.00079	5.39516	0.16432	0.336116	0.009981	0.975	-2.1	.	1902	12	1884	26	1868	48
15BD_202	15BD_202-130	274	16.3	0	377	0.05721	0.00027	0.58979	0.01002	0.074772	0.001218	0.959	-7.2	-2.3	500	10	471	6	465	7
15BD_202	15BD_202-179	728	65.7	0	972	0.058	0.00048	0.63257	0.02042	0.079097	0.002468	0.967	-7.7	.	530	17	498	13	491	15
15BD_202	15BD_202-42	506	43	0	642	0.05806	0.00047	0.64672	0.0086	0.080785	0.000847	0.789	-6.1	.	532	16	506	5	501	5
15BD_202	15BD_202-81	885	154.2	0	2658	0.07271	0.002	1.79868	0.06833	0.179415	0.004689	0.688	6.2	.	1006	54	1045	25	1064	26
15BD_202	15BD_202-255	84	12.1	0	165	0.07699	0.00056	1.85596	0.07383	0.174829	0.006837	0.983	-8	-4.3	1121	14	1066	26	1039	38
15BD_202	15BD_202-227	130	30.2	0	271	0.08071	0.00048	2.19172	0.05452	0.196957	0.004756	0.971	-5	-2.1	1214	11	1178	17	1159	26
15BD_202	15BD_202-19	171	33.9	0	698	0.08069	0.00074	2.08365	0.02903	0.187295	0.001956	0.749	-9.6	-6	1214	18	1143	10	1107	11
15BD_202	15BD_202-128	23	4.6	0	109	0.09266	0.00056	3.08063	0.05887	0.241129	0.004369	0.948	-6.6	-4.1	1481	12	1428	15	1393	23
15BD_202	15BD_202-165	29	5.9	0	140	0.09715	0.00057	3.40989	0.07337	0.254554	0.005266	0.961	-7.7	-5.4	1570	11	1507	17	1462	27
15BD_202	15BD_202-60	94	23.9	0	565	0.0976	0.00296	3.4397	0.14344	0.255614	0.007313	0.686	-7.9	.	1579	56	1514	33	1467	38
15BD_202	15BD_202-106	61	14.3	0	274	0.09893	0.00053	3.65732	0.07078	0.268118	0.004987	0.961	-5.1	-3	1604	10	1562	15	1531	25
15BD_202	15BD_202-159	117	25.7	0	635	0.10044	0.00052	3.75635	0.07507	0.271248	0.005233	0.965	-5.9	-3.8	1632	10	1583	16	1547	27
15BD_202	15BD_202-233	16	5.2	0	51	0.10182	0.00085	3.8717	0.114	0.275788	0.007791	0.959	-5.9	-2.7	1658	15	1608	24	1570	39
15BD_202	15BD_202-149	362	84.6	0	1733	0.1059	0.00052	4.10341	0.07539	0.281029	0.004972	0.963	-8.7	-6.9	1730	9	1655	15	1597	25
15BD_202	15BD_202-141	35	8.6	0	164	0.10897	0.00065	4.42063	0.0876	0.294234	0.005563	0.954	-7.6	-5.5	1782	10	1716	16	1663	28
15BD_202	15BD_202-132	226	57.4	0	1313	0.10958	0.00054	4.52248	0.08613	0.299313	0.005503	0.965	-6.6	-4.8	1793	9	1735	16	1688	27
15BD_202	15BD_202-92	559	153.7	0	3703	0.10972	0.00053	4.57668	0.09198	0.302536	0.005899	0.97	-5.8	-4	1795	9	1745	17	1704	29
15BD_202	15BD_202-139	96	24	0	541	0.11087	0.00058	4.5484	0.0877	0.297532	0.005524	0.963	-8.4	-6.6	1814	9	1740	16	1679	27
15BD_202	15BD_202-161	78	19.6	0	447	0.11195	0.00062	4.75962	0.10657	0.308357	0.006693	0.969	-6.1	-4.2	1831	10	1778	19	1733	33
15BD_202	15BD_202-129	89	23.2	0	579	0.11301	0.0006	4.7478	0.09158	0.304699	0.005654	0.962	-8.2	-6.4	1848	10	1776	16	1715	28
15BD_202	15BD_202-124	66	17.9	0	378	0.11573	0.00061	5	0.10108	0.312292	0.006114	0.965	-8.4	-6.6	1891	9	1816	17	1752	30
15BD_202	15BD_202-63	28	9.2	0	190	0.1174	0.00397	5.25863	0.24943	0.324861	0.0108	0.701	-6.2	.	1917	59	1862	40	1813	53
15BD_202	15BD_202-33	133	48.9	0	616	0.12089	0.00126	5.62296	0.09499	0.337348	0.004483	0.787	-5.6	-2.4	1969	18	1920	15	1874	22
15BD_202	15BD_202-32	110	52.4	0	708	0.16349	0.00206	9.72152	0.18681	0.431255	0.006265	0.756	-8.6	-5.5	2492	21	2409	18	2311	28
15BD_202	15BD_202-90	129	66.9	0	1247	0.18521	0.00916	12.1135	0.82212	0.474364	0.022039	0.685	-8.8	.	2700	83	2613	64	2503	96
15BD_202	15BD_202-47	37	19.9	0	332	0.1915	0.00272	12.853	0.27713	0.486769	0.007902	0.753	-8.7	-5.4	2755	23	2669	20	2557	34
15BD_202	15BD_202-59	200	110.5	0	2097	0.20039	0.01026	13.7266	0.9706	0.496797	0.024219	0.689	-9.8	.	2829	82	2731	67	2600	104
15BD_202	15BD_202-231	39	24.7	0	255	0.20276	0.00195	14.4604	0.5816	0.517252	0.020198	0.971	-6.9	-4.2	2849	15	2780	38	2688	86
15BD_202	15BD_202-197	17	10.7	0	98	0.20462	0.00212	14.4159	0.56126	0.510955	0.019176	0.964	-8.6	-5.8	2863	16	2777	37	2661	82
15BD_202	15BD_202-26	297	29.1	0	523	0.05715	0.00046	0.74056	0.0113	0.093975	0.00122	0.851	17.1	8.7	498	17	563	7	579	7
15BD_202	15BD_202-206	338	29.3	0	283	0.05823	0.00042	0.59835	0.01402	0.074526	0.00166	0.951	-14.5	-8	538	16	476	9	463	10
15BD_202	15BD_202-187	1613	145.3	0	1545	0.0597	0.0005	0.6489	0.02313	0.078828	0.002731	0.972	-18.2	-11.6	593	17	508	14	489	16
15BD_202	15BD_202-22	400	33	0	589	0.0603	0.00052	0.65333	0.00941	0.078581	0.000903	0.798	-21.4	-15.7	614	18	511	6	488	5
15BD_202	15BD_202-239	18	1.7	0	36	0.06372	0.00093	0.90238	0.02273	0.102703	0.002104	0.813	-14.7	-5.5	733	31	653	12	630	12
15BD_202	15BD_202-173	244	14.7	0	215	0.0654	0.0005	0.71431	0.01492	0.07921	0.001541	0.932	-39	-35.7	787	15	547	9	491	9
15BD_202	15BD_202-45	329	27.6	0	287	0.0748	0.00118	0.82131	0.01521	0.079639	0.000779	0.528	-55.6	-52.2	1063	32	609	8	494	5
15BD_202	15BD_202-250	6	0.6	0	12	0.07622	0.00141	1.30454	0.06658	0.124139	0.005908	0.932	-33.3	-26.3	1101	36	848	29	754	34
15BD_202	15BD_202-223	230	30.8	0	281	0.07633	0.00052	1.21002	0.02777	0.114966	0.002518	0.954	-38.4	-36.1	1104	13	805	13	702	15
15BD_202	15BD_202-85	244	32.5	0	621	0.07671	0.00223	1.5	0.06033	0.142935	0.003908	0.685	-24.2	-13.5	1114	57	935	24	861	22
15BD_202	15BD_202-219	177	32.5	0	317	0.08038	0.00059	1.73171	0.04171	0.156262	0.003587	0.953	-24.1	-21.2	1206	14	1020	16	936	20
15BD_202	15BD_202-240	82	12.2	0	207	0.08124	0.00134	1.91665	0.07004	0.171109	0.005576	0.892	-18.4	-11.6	1227	32	1087	24	1018	31
15BD_202	15BD_202-156	379	49.3	0	660	0.08189	0.0004	1.85009	0.03527	0.163863	0.003017	0.966	-22.9	-21	1243	9	1063	13	978	17
15BD_202	15BD_202-80	820	70.5	0	582	0.08314	0.00248	1.04222	0.04179	0.090916	0.002438	0.669	-58.3	-53.1	1273	56	725	21	561	14
15BD_202	15BD_202-167	102	11.9	0	256	0.08654	0.0006	1.84214	0.04258	0.154379	0.003407	0.955	-33.8	-31.6	1350	13	1061	15	925	19
15BD_202	15BD_202-146	174	22.5	0	494	0.08726	0.0005	1.94938	0.03416	0.16203	0.002683	0.945	-31.4	-29.5	1366	11	1098	12	968	15
15BD_202	15BD_202-88	528	62.1	0	845	0.08775	0.00265	1.50008	0.06074	0.123987	0.00334	0.665	-47.9	-41.8	1377	57	930	25	753	19
15BD_202	15BD_202-253	33	3.2	0	44	0.09015	0.0031	1.48407	0.09218	0.119394	0.006175	0.833	-51.9	-44.6	1429	64	924	38	727	36
15BD_202	15BD_202-221	37	9.5	0	106	0.09232	0.00062	2.78183	0.07082	0.218533	0.005369	0.965	-14.9	-12.4	1474	12	1351	19	1274	28
15BD_202	15BD_202-241	8	1.5	0	35	0.09384	0.00095	2.92519	0.09785	0.226072	0.007205	0.953	-14	-10.2	1505	19	1388	25	1314	38
15BD_202	15BD_202-226	145	15.6	0	157	0.09732	0.00109	1.2	0.03444	0.093053	0.002347	0.914	-66.3	-64.7	1573	20	823	16	574	14
15BD_202	15BD_202-185	345	61.1	0	773	0.09937	0.00101	2.13079	0.07561	0.155523	0.005288	0.958	-45.3	-42.9	1612	18	1159	25	932	30
15BD_202	15BD_202-107	104	21.5	0	399	0.10076	0.00052	3.3	0.06546	0.237642	0.004548	0.965	-17.9	-16.1	1638	9	1481	15	1374	24
15BD_202	15BD_202-18	40	9.2	0	176	0.10163	0.00098	3.0527	0.04718	0.21785	0.002623	0.779	-25.5	-22.9	1654	18	1421	12	1271	14
15BD_202	15BD_202-135a	77	16.4	0	440	0.10472	0.00058	3.70695	0.07055	0.256728	0.004676	0.957	-15.5	-13.6	1709	10	1573	15	1473	24
15BD_202	15BD_202-30	146	31.9	0	507	0.10694	0.00106	3.02694	0.0536	0.205281	0.003018	0.83	-34.1	-31.7	1748	17	1414	14	1204	16
15BD_202	15BD_202-172	166	31.7	0	543	0.1078	0.00057	3.59295	0.07671	0.241732	0.004999	0.969	-23.1	-21.5	1763	9	1548	17	1396	26
15BD_202	15BD_202-166	197	35.8	0	719	0.10908	0.00058	3.43213	0.06524	0.228204	0.004168	0.961	-28.4	-27	1784	9	1512	15	1325	22
15BD_202	15BD_202-140	152	30.4	0	547	0.11003	0.00057	3.66868	0.07116	0.241824	0.004518	0.963	-24.9	-23.4	1800	9	1565	15	1396	23
15BD_202	15BD_202-112	53	13.3	0	211	0.11278	0.00062	4.45236	0.09046	0.286328	0.005598	0.962	-13.6	-11.7	1845	9	1722	17	1623	28
15BD_202	15BD_202-242	16	3.6	0	81	0.11443	0.00088	4.15166	0.10649	0.263146	0.006439	0.954	-21.8	-19.6	1871	14	1665	21	1506	33
15BD_202	15BD_202-108	24	6.7	0	144	0.12472	0.00074	5.45747	0.13681	0.317371	0.007731	0.972	-14	-12.2	2025	10	1894	22	1777	38
15BD_202	15BD_202-125	120	36.3	0	699	0.13111	0.00072	6.22171	0.1385	0.34416	0.007427	0.969	-11.3	-9.6	2113	10	2008	19	1907	36
15BD_202	15BD_202-164	332	39.9	0	634	0.13973	0.00103	2.9921	0.06134	0.155304	0.002969	0.932	-62.3	-61.4	2224	12	1406	16	931	17
15BD_202	15BD_202-208	522	121.1	0	1101	0.14104	0.00136	3.83587	0.10219	0.197248	0.0049	0.932	-52.5	-51	2240	16	1600	21	1161	26
15BD_202	15BD_202-01	76	31.7	0	436	0.15638	0.00182	8.26369	0.14689	0.383265	0.005142	0.755	-15.7	-13	2417	19	2260	16	2092	24
15BD_202	15BD_202-36	555	90.6	0	511	0.15754	0.00202	3.29876	0.06951	0.151864	0.00254	0.794	-66.8	-65.6	2429	22	1481	16	911	14
15BD_202	15BD_202-142	339	54.3	0	789	0.16234	0.00196	4.58548	0.15152	0.204857	0.006302	0.931	-56.3	-54.6	2480	20	1747	28	1201	34
15BD_202	15BD_202-10	336	87.7	0	1593	0.16435	0.00234	5.71887	0.15316	0.252367	0.005727	0.847	-46.8	-44.5	2501	23	1934	23	1451	29
15BD_202	15BD_202-99	538	77.5	0	229	0.1666	0.00124	3.84185	0.09156	0.167247	0.003785	0.95	-65.1	-64.3	2524	12	1602	19	997	21
15BD_202	15BD_202-162	99	17.1	0	382	0.16702	0.00119	4.97869	0.11464	0.216188	0.004733	0.951	-55	-54	2528	12	1816	19	1262	25
15BD_202	15BD_202-222	354	139.9	0	946	0.17043	0.00146	7.72332	0.22066	0.328672	0.008959	0.954	-32.6	-30.8	2562	14	2199	26	1832	43
15BD_202	15BD_202-78	294	95.7	0	1132	0.1716	0.0078	7.56025	0.42566	0.319535	0.010616	0.59	-34.9	-28.2	2573	73	2180	50	1787	52
15BD_202	15BD_202-178	336	85.3	0	723	0.17496	0.00241	5.29907	0.19832	0.219659	0.007646	0.93	-55.9	-54	2606	22	1869	32	1280	40
15BD_202	15BD_202-43	56	27.4	0	426	0.17584	0.00234	10.7544	0.21558	0.443573	0.00664	0.747	-11.3	-8.2	2614	21	2502	19	2367	30
15BD_202	15BD_202-94	274	87.7	0	1427	0.17595	0.00166	8.4612	0.26996	0.348773	0.010631	0.955	-30.3	-28.2	2615	15	2282	29	1929	51
15BD_202	15BD_202-174	95	24.9	0	450	0.17625	0.00135	7.98289	0.18551	0.328497	0.007209	0.944	-34.4	-32.9	2618	12	2229	21	1831	35
15BD_202	15BD_202-234	51	27.5	0	285	0.17704	0.00156	10.6474	0.39096	0.436189	0.015546	0.971	-13.2	-10.9	2625	14	2493	34	2334	70
15BD_202	15BD_202-11	370	167.5	0	3656	0.17847	0.00229	10.2046	0.1978	0.414688	0.006019	0.749	-18	-15.2	2639	21	2453	18	2236	27
15BD_202	15BD_202-84	247	113.2	0	1621	0.17984	0.00861	10.6821	0.68015	0.430787	0.018086	0.659	-15.3	-5.6	2651	78	2496	59	2309	81
15BD_202	15BD_202-23	192	88	0	1991	0.18177	0.00239	10.4433	0.20911	0.416698	0.006283	0.753	-18.8	-15.9	2669	21	2475	19	2245	29
15BD_202	15BD_202-53	38	19.6	0	506	0.18314	0.00253	11.6424	0.24608	0.461062	0.007367	0.756	-10.6	-7.4	2682	22	2576	20	2444	33
15BD_202	15BD_202-93	212	67.4	0	1010	0.18396	0.00125	8.79166	0.21571	0.346615	0.008172	0.961	-33	-31.6	2689	11	2317	22	1918	39
15BD_202	15BD_202-05	279	129.2	0	2498	0.18481	0.00245	10.8673	0.2131	0.426482	0.006157	0.736	-17.9	-15.1	2696	21	2512	18	2290	28
15BD_202	15BD_202-91	90	39	0	710	0.18486	0.00916	10.4563	0.66958	0.410236	0.016649	0.634	-21	-12	2697	83	2476	59	2216	76
15BD_202	15BD_202-254	50	15.6	0	251	0.18539	0.0014	9.45201	0.31817	0.369783	0.01213	0.975	-29	-27.3	2702	12	2383	31	2028	57
15BD_202	15BD_202-71	256	116.4	0	1608	0.18618	0.00904	10.9298	0.6953	0.42577	0.017513	0.647	-18.5	-9.2	2709	78	2517	59	2287	79
15BD_202	15BD_202-66	284	120.9	0	2465	0.18661	0.009	10.3606	0.64287	0.402673	0.015717	0.629	-23	-14.5	2712	78	2468	57	2181	72
15BD_202	15BD_202-217	111	60.4	0	569	0.18826	0.0017	11.5048	0.38965	0.443215	0.014465	0.964	-15.8	-13.5	2727	15	2565	32	2365	65
15BD_202	15BD_202-202	172	77.9	0	629	0.18823	0.00177	9.66408	0.32382	0.372372	0.011978	0.96	-29.3	-27.2	2727	15	2403	31	2041	56
15BD_202	15BD_202-158	202	75.2	0	1621	0.18891	0.00134	11.3553	0.2732	0.435948	0.010023	0.956	-17.4	-15.6	2733	12	2553	22	2332	45
15BD_202	15BD_202-236	145	73.7	0	853	0.18973	0.00174	10.9172	0.37944	0.417334	0.013991	0.965	-21.2	-19	2740	15	2516	32	2248	64
15BD_202	15BD_202-163	209	75.9	0	1809	0.19056	0.00136	11.2511	0.26702	0.428217	0.009692	0.954	-19.4	-17.7	2747	11	2544	22	2298	44
15BD_202	15BD_202-31	235	106.4	0	976	0.19183	0.00269	10.8766	0.2242	0.411225	0.00622	0.734	-23	-20.2	2758	22	2513	19	2221	28
15BD_202	15BD_202-21	70	34.8	0	741	0.19255	0.00264	11.977	0.24718	0.451121	0.006951	0.747	-15.7	-12.8	2764	22	2603	19	2400	31
15BD_202	15BD_202-238	39	11.2	0	177	0.19712	0.00172	8.69792	0.19542	0.320025	0.006628	0.922	-41.2	-39.7	2802	13	2307	20	1790	32
15BD_202	15BD_202-251	11	3.7	0	73	0.19817	0.0018	10.2	0.26891	0.372613	0.009242	0.939	-31.8	-30	2811	14	2451	24	2042	43
15BD_202	15BD_202-183	133	62.8	0	899	0.19931	0.00302	11.1415	0.55286	0.405432	0.019155	0.952	-26.1	-22.7	2821	23	2535	46	2194	88
15BD_202	15BD_202-218	102	40.1	0	742	0.20105	0.00152	12.8175	0.32237	0.462376	0.011092	0.954	-16.3	-14.4	2835	12	2666	24	2450	49
15BD_202	15BD_202-72	184	121.8	0	1883	0.31696	0.02638	24.9	2.53351	0.569941	0.03333	0.575	-22.5	-10.4	3555	125	3305	99	2908	137
15BD_202	15BD_202-123	191	104	0	1906	0.33099	0.00364	25.6898	0.85115	0.562913	0.017596	0.943	-25.3	-23.1	3622	15	3335	32	2879	73
15BD_213	15BD213_149	92	8.3	0	2300	0.05685	0.00036	0.63472	0.00796	0.080969	0.000872	0.859	3.4	.	486	14	499	5	502	5
15BD_213	15BD213_180	378	32.8	0	10311	0.05699	0.00033	0.61828	0.00774	0.078679	0.000871	0.885	-0.7	.	491	13	489	5	488	5
15BD_213	15BD213_182	286	25	0	5767	0.05701	0.00034	0.62306	0.00816	0.079259	0.000924	0.89	-0.1	.	492	12	492	5	492	6
15BD_213	15BD213_167	273	23.2	0	13079	0.05711	0.00036	0.60618	0.00778	0.076986	0.000861	0.872	-3.7	.	496	14	481	5	478	5
15BD_213	15BD213_115	199	17	0	20695	0.05726	0.00058	0.63745	0.00824	0.080746	0.000646	0.619	-0.2	.	501	21	501	5	501	4
15BD_213	15BD213_127	236	19.6	0	16194	0.05747	0.0006	0.62316	0.00809	0.078648	0.00061	0.597	-4.4	.	509	22	492	5	488	4
15BD_213	15BD213_171	461	40.4	0	11900	0.05766	0.00031	0.63311	0.00804	0.07963	0.000917	0.906	-4.6	.	517	11	498	5	494	5
15BD_213	15BD213_101	519	73.8	0	20543	0.07229	0.00086	1.63354	0.03731	0.163899	0.003201	0.855	-1.7	.	994	23	983	14	978	18
15BD_213	15BD213_128	142	26.6	0	9180	0.0732	0.00076	1.76262	0.02324	0.17465	0.001416	0.615	1.9	.	1019	20	1032	9	1038	8
15BD_213	15BD213_88	236	34.8	0	10455	0.07342	0.00088	1.71994	0.03849	0.1699	0.003205	0.843	-1.5	.	1026	24	1016	14	1012	18
15BD_213	15BD213_124	100	18.1	0	8811	0.07347	0.00081	1.70474	0.02316	0.168291	0.00134	0.586	-2.5	.	1027	21	1010	9	1003	7
15BD_213	15BD213_104	244	37	0	6518	0.07379	0.00089	1.78637	0.0409	0.175583	0.003411	0.849	0.7	.	1036	24	1041	15	1043	19
15BD_213	15BD213_137	40	7.5	0	2625	0.07381	0.00058	1.69551	0.0248	0.166605	0.002057	0.844	-4.5	-0.5	1036	16	1007	9	993	11
15BD_213	15BD213_150	105	19.7	0	14649	0.07392	0.00043	1.70481	0.02269	0.167271	0.002002	0.899	-4.4	-1.3	1039	11	1010	9	997	11
15BD_213	15BD213_05	392	58.8	0	27797	0.07429	0.00029	1.88189	0.02408	0.18373	0.002243	0.954	3.9	0.9	1049	8	1075	8	1087	12
15BD_213	15BD213_50	68	8.3	0	6645	0.07438	0.00044	1.8278	0.0273	0.178231	0.00244	0.916	0.6	.	1052	12	1055	10	1057	13
15BD_213	15BD213_147	217	44.2	0	19220	0.07444	0.00041	1.85143	0.02417	0.180383	0.00214	0.909	1.6	.	1053	10	1064	9	1069	12
15BD_213	15BD213_53	197	24.2	0	18093	0.07482	0.00038	1.83725	0.02651	0.178086	0.002407	0.937	-0.7	.	1064	10	1059	9	1057	13
15BD_213	15BD213_66	105	13	0	9924	0.07498	0.00045	1.87945	0.02965	0.181803	0.002657	0.926	0.9	.	1068	11	1074	10	1077	14
15BD_213	15BD213_111	75	11.5	0	16092	0.07496	0.00096	1.85333	0.04391	0.17931	0.003568	0.84	-0.4	.	1068	25	1065	16	1063	20
15BD_213	15BD213_87	216	33.8	0	8102	0.075	0.00091	1.87117	0.04303	0.180944	0.003537	0.85	0.4	.	1069	23	1071	15	1072	19
15BD_213	15BD213_189	37	7.4	0	2414	0.07546	0.0005	1.83844	0.02562	0.176692	0.002165	0.88	-3.2	.	1081	13	1059	9	1049	12
15BD_213	15BD213_42	109	13.4	0	8269	0.07561	0.00041	1.82589	0.02704	0.175142	0.002411	0.93	-4.4	-1.5	1085	11	1055	10	1040	13
15BD_213	15BD213_117	54	10.5	0	3837	0.076	0.00082	1.87872	0.0289	0.179297	0.001963	0.711	-3.2	.	1095	21	1074	10	1063	11
15BD_213	15BD213_122	77	14.9	0	17555	0.07632	0.00084	1.87575	0.02588	0.178242	0.001473	0.599	-4.5	.	1104	21	1073	9	1057	8
15BD_213	15BD213_71	251	33.4	0	19237	0.07775	0.0004	2.09364	0.03328	0.195309	0.002939	0.947	0.9	.	1140	10	1147	11	1150	16
15BD_213	15BD213_144	85	18.8	0	8248	0.07872	0.00048	2.11619	0.02888	0.194971	0.002379	0.894	-1.6	.	1165	12	1154	9	1148	13
15BD_213	15BD213_40	117	16.1	0	21424	0.07871	0.00039	2.1114	0.03167	0.194548	0.002758	0.945	-1.8	.	1165	10	1153	10	1146	15
15BD_213	15BD213_99	361	62.8	0	12246	0.07886	0.00097	2.21936	0.05315	0.204111	0.004188	0.857	2.7	.	1169	23	1187	17	1197	22
15BD_213	15BD213_146	112	25	0	11116	0.07903	0.00046	2.14771	0.02907	0.197088	0.002403	0.901	-1.2	.	1173	11	1164	9	1160	13
15BD_213	15BD213_155	133	30.6	0	13029	0.07942	0.00044	2.22189	0.03073	0.2029	0.002567	0.915	0.8	.	1183	11	1188	10	1191	14
15BD_213	15BD213_65	265	37.2	0	23348	0.08068	0.00043	2.2923	0.03798	0.206076	0.003231	0.946	-0.5	.	1214	10	1210	12	1208	17
15BD_213	15BD213_113	111	19.9	0	10374	0.0809	0.00105	2.37105	0.06	0.212573	0.004624	0.86	2.1	.	1219	24	1234	18	1243	25
15BD_213	15BD213_109	64	11.8	0	5195	0.08526	0.00115	2.56286	0.06622	0.218012	0.004805	0.853	-4.2	.	1321	25	1290	19	1271	25
15BD_213	15BD213_86	699	140.2	0	18734	0.0874	0.00114	2.8932	0.07574	0.240077	0.005446	0.866	1.4	.	1369	25	1380	20	1387	28
15BD_213	15BD213_07	226	44.8	0	21609	0.08745	0.00036	2.90106	0.04036	0.240611	0.003199	0.956	1.6	.	1370	8	1382	11	1390	17
15BD_213	15BD213_55	202	33.9	0	22571	0.08803	0.00046	2.92801	0.04575	0.241234	0.003553	0.942	0.8	.	1383	10	1389	12	1393	18
15BD_213	15BD213_116	47	12.3	0	5803	0.09043	0.00106	2.99885	0.04505	0.240506	0.002275	0.63	-3.5	.	1435	21	1407	11	1389	12
15BD_213	15BD213_186	125	34.8	0	11941	0.09219	0.00057	3.10754	0.04619	0.244461	0.003308	0.91	-4.7	-2.1	1471	11	1435	11	1410	17
15BD_213	15BD213_39	110	20.3	0	14198	0.09261	0.0005	3.29252	0.05633	0.257847	0.00419	0.95	-0.1	.	1480	10	1479	13	1479	21
15BD_213	15BD213_188	169	50.4	0	13743	0.09364	0.00058	3.36089	0.05034	0.260317	0.003553	0.911	-0.7	.	1501	11	1495	12	1491	18
15BD_213	15BD213_130	138	40	0	19231	0.09707	0.0011	3.52698	0.05178	0.263513	0.002448	0.633	-4.3	-0.8	1569	20	1533	12	1508	12
15BD_213	15BD213_151	53	17	0	6611	0.10043	0.00062	3.84492	0.05926	0.277677	0.003917	0.915	-3.6	-1.2	1632	11	1602	12	1580	20
15BD_213	15BD213_44	432	85.4	0	60854	0.10094	0.0005	3.89092	0.06463	0.27956	0.004431	0.954	-3.6	-1.6	1642	9	1612	13	1589	22
15BD_213	15BD213_158	166	62.4	0	15438	0.11513	0.00074	5.13926	0.08656	0.323743	0.005046	0.925	-4.5	-2.2	1882	11	1843	14	1808	25
15BD_213	15BD213_78	36	8.5	0	3877	0.11551	0.00074	5.46012	0.1084	0.34282	0.006442	0.946	0.8	.	1888	11	1894	17	1900	31
15BD_213	15BD213_52	414	99.4	0	68288	0.1165	0.00065	5.47217	0.10034	0.340663	0.005951	0.953	-0.8	.	1903	10	1896	16	1890	29
15BD_213	15BD213_74	113	26.3	0	19063	0.11887	0.00071	5.49557	0.10481	0.335317	0.006077	0.95	-4.5	-2.4	1939	10	1900	16	1864	29
15BD_213	15BD213_134	183	80.3	0	50039	0.12971	0.00087	6.63039	0.11092	0.370745	0.005683	0.916	-3.4	-1.1	2094	12	2063	15	2033	27
15BD_213	15BD213_163	347	151.2	0	113741	0.13063	0.00088	6.68205	0.12181	0.370993	0.006286	0.929	-4	-1.7	2106	11	2070	16	2034	30
15BD_213	15BD213_105	19	6.7	0	3135	0.16655	0.00362	10.807	0.42911	0.470616	0.01564	0.837	-1.8	.	2523	36	2507	37	2486	69
15BD_213	15BD213_04	216	97.6	0	55931	0.18805	0.00121	13.5647	0.30536	0.523171	0.011288	0.959	-0.6	.	2725	10	2720	21	2713	48
15BD_213	15BD213_63	58	22.8	0	17147	0.21077	0.00176	15.8621	0.4046	0.545826	0.013151	0.945	-4.4	-2	2911	13	2869	24	2808	55
15BD_213	15BD213_129	296	25.5	0	8120	0.05633	0.00057	0.63386	0.00827	0.081618	0.000677	0.635	9.1	1.5	465	21	498	5	506	4
15BD_213	15BD213_73	475	25.8	0	14588	0.05658	0.00028	0.63538	0.0101	0.081446	0.001229	0.949	6.5	0.6	475	11	499	6	505	7
15BD_213	15BD213_108	210	14.2	0	5001	0.05741	0.00067	0.58468	0.01169	0.07386	0.001199	0.812	-9.8	.	507	24	467	7	459	7
15BD_213	15BD213_177	190	19	0	6186	0.05767	0.0004	0.71528	0.01171	0.089955	0.001336	0.907	7.7	0.7	517	15	548	7	555	8
15BD_213	15BD213_03	957	61.8	0	9247	0.05784	0.00022	0.63167	0.0082	0.079204	0.000983	0.956	-6.4	-2.7	524	8	497	5	491	6
15BD_213	15BD213_24	629	60.5	0	2771	0.06189	0.00075	1.02661	0.01943	0.120312	0.001746	0.767	9.8	1.5	670	24	717	10	732	10
15BD_213	15BD213_165	127	22.2	0	8727	0.07194	0.00043	1.54828	0.02046	0.1561	0.001839	0.892	-5.4	-2.1	984	12	950	8	935	10
15BD_213	15BD213_97	187	30.5	0	9093	0.07377	0.00089	1.93409	0.04577	0.190161	0.003875	0.861	9.2	2.3	1035	25	1093	16	1122	21
15BD_213	15BD213_95	254	38.5	0	14483	0.07738	0.00096	1.87761	0.04641	0.175979	0.003762	0.865	-8.2	-2.3	1131	25	1073	16	1045	21
15BD_213	15BD213_79	983	174.2	0	85416	0.07823	0.00085	2.24622	0.04659	0.208237	0.003679	0.852	6.3	0.7	1153	21	1196	15	1219	20
15BD_213	15BD213_96	312	63.8	0	30789	0.08646	0.00112	2.91964	0.07489	0.244915	0.00542	0.863	5.3	.	1348	26	1387	19	1412	28
15BD_213	15BD213_164	112	28	0	10160	0.08674	0.00052	2.63992	0.0386	0.220733	0.002945	0.912	-5.6	-3	1355	12	1312	11	1286	16
15BD_213	15BD213_62	160	24.2	0	169727	0.08698	0.00046	2.65153	0.04166	0.221088	0.003268	0.941	-5.9	-3.5	1360	10	1315	12	1288	17
15BD_213	15BD213_172	51	12.6	0	4532	0.08723	0.0006	2.63596	0.03983	0.219156	0.002943	0.889	-7.1	-4.2	1366	13	1311	11	1277	16
15BD_213	15BD213_110	74	15.6	0	5264	0.0961	0.00137	3.37976	0.09223	0.255068	0.005928	0.852	-6.1	-0.7	1550	25	1500	21	1465	30
15BD_213	15BD213_159	92	29.1	0	7347	0.10063	0.00064	3.80772	0.05973	0.274433	0.003932	0.913	-5	-2.5	1636	11	1594	13	1563	20
15BD_213	15BD213_169	562	197.1	0	26391	0.1118	0.00069	4.68367	0.07684	0.30383	0.004618	0.926	-7.4	-5.2	1829	11	1764	14	1710	23
15BD_213	15BD213_156	19	7.2	0	2720	0.12214	0.00089	5.48495	0.09968	0.325704	0.005422	0.916	-9.8	-7.4	1988	12	1898	16	1818	26
15BD_213	15BD213_41	108	35.1	0	20590	0.17048	0.00119	10.4347	0.23572	0.443927	0.009541	0.951	-9	-7	2562	12	2474	21	2368	43
15BD_213	15BD213_47	29	9.4	0	4782	0.17243	0.00125	10.5553	0.23291	0.443981	0.009256	0.945	-9.8	-7.8	2581	12	2485	20	2368	41
15BD_213	15BD213_75_2	18	5.8	0	3125	0.17559	0.0014	10.9352	0.25331	0.451677	0.009824	0.939	-9.6	-7.3	2612	13	2518	22	2403	44
15BD_213	15BD213_125	83	46.6	0	12371	0.18457	0.003	12.2671	0.2522	0.48204	0.006076	0.613	-7.1	-3.8	2694	25	2625	19	2536	26
15BD_213	15BD213_46	90	32	0	31789	0.18534	0.0014	12.5492	0.29559	0.491075	0.010952	0.947	-5.7	-3.4	2701	12	2646	22	2575	47
15BD_213	15BD213_46_2	90	32.4	0	31438	0.18538	0.00136	12.5795	0.29216	0.49215	0.010847	0.949	-5.5	-3.3	2702	12	2649	22	2580	47
15BD_213	15BD213_181	27	15.5	0	12411	0.18834	0.0017	12.6366	0.27917	0.486626	0.009807	0.912	-7.6	-5.1	2728	15	2653	21	2556	43
15BD_213	15BD213_174	156	92.1	0	32669	0.19066	0.00165	12.8621	0.29629	0.489277	0.010448	0.927	-7.9	-5.5	2748	14	2670	22	2568	45
15BD_213	15BD213_64	191	67.4	0	45629	0.19278	0.00151	13.1823	0.32143	0.49594	0.011454	0.947	-7.4	-5.2	2766	12	2693	23	2596	49
15BD_213	15BD213_56	72	26.7	0	31261	0.19948	0.00169	14.2629	0.35309	0.51856	0.012058	0.939	-5.6	-3.2	2822	14	2767	23	2693	51
15BD_213	15BD213_60	100	42.8	0	41687	0.24572	0.00233	20.0095	0.54901	0.5906	0.015208	0.938	-6.5	-4	3157	14	3092	27	2992	62
15BD_213	15BD213_193	51	37.5	0	10067	0.2637	0.00298	21.6802	0.57783	0.596287	0.014391	0.905	-9.7	-6.9	3269	17	3170	26	3015	58
15BD_213	15BD213_131	368	30.4	0	19048	0.05564	0.00055	0.59962	0.00735	0.078167	0.00056	0.585	11.2	3.9	438	21	477	5	485	3
15BD_213	15BD213_102	262	17.3	0	4420	0.05883	0.00066	0.58379	0.01133	0.071971	0.001144	0.819	-20.8	-12.5	561	23	467	7	448	7
15BD_213	15BD213_135	649	56.8	0	7233	0.05943	0.00032	0.64496	0.00726	0.078707	0.000781	0.881	-16.8	-12.9	583	11	505	4	488	5
15BD_213	15BD213_195	616	53.7	0	21760	0.05986	0.00041	0.65746	0.00962	0.079653	0.001028	0.882	-18.2	-13.2	599	14	513	6	494	6
15BD_213	15BD213_82	625	41.8	0	9808	0.06007	0.0007	0.60065	0.01144	0.072519	0.001096	0.793	-26.4	-19.1	606	24	478	7	451	7
15BD_213	15BD213_45	178	9.5	0	4249	0.06052	0.0004	0.64759	0.00886	0.077603	0.000931	0.878	-23.4	-19.2	622	14	507	5	482	6
15BD_213	15BD213_94	445	31.1	0	2632	0.06077	0.00069	0.63716	0.0122	0.076037	0.001176	0.808	-26.1	-19.2	631	25	501	8	472	7
15BD_213	15BD213_140	173	15	0	4730	0.06222	0.00094	0.6742	0.01244	0.078588	0.000827	0.57	-29.5	-21	682	33	523	8	488	5
15BD_213	15BD213_194	256	22	0	2772	0.06632	0.00133	0.71676	0.01705	0.078378	0.001	0.537	-42	-34	817	41	549	10	486	6
15BD_213	15BD213_191	937	85.3	0	678	0.0685	0.00044	0.77162	0.01292	0.081703	0.001263	0.923	-44.4	-42	884	13	581	7	506	8
15BD_213	15BD213_142	296	26.5	0	684	0.07666	0.00089	0.85077	0.0134	0.080487	0.000855	0.675	-57.3	-55	1112	22	625	7	499	5
15BD_213	15BD213_112	89	13.2	0	2515	0.07839	0.00174	1.85085	0.05498	0.171249	0.003385	0.665	-12.9	-4.2	1157	42	1064	20	1019	19
15BD_213	15BD213_120	10	1.9	0	847	0.07949	0.00137	1.98852	0.04624	0.181436	0.002825	0.67	-10	-3.3	1184	33	1112	16	1075	15
15BD_213	15BD213_19	909	72.7	0	455	0.09179	0.00061	1.2509	0.01962	0.098834	0.001405	0.906	-61.2	-60.1	1463	13	824	9	608	8
15BD_213	15BD213_185	482	85.2	0	898	0.09397	0.00062	2.0411	0.0303	0.157534	0.002094	0.895	-40.2	-38.5	1508	12	1129	10	943	12
15BD_213	15BD213_10	280	24.1	0	302	0.09893	0.00214	1.44057	0.04109	0.105611	0.001967	0.653	-62.6	-60	1604	39	906	17	647	11
15BD_213	15BD213_143	710	148.4	0	7387	0.0997	0.00068	2.5355	0.05301	0.184452	0.003644	0.945	-35.4	-33.5	1618	13	1282	15	1091	20
15BD_213	15BD213_91	632	85.7	0	795	0.10263	0.00165	2.18721	0.05701	0.154567	0.003172	0.787	-47.8	-44.8	1672	28	1177	18	927	18
15BD_213	15BD213_133	356	92.9	0	2719	0.11343	0.00105	3.59247	0.06135	0.229705	0.0033	0.841	-31.1	-28.9	1855	16	1548	14	1333	17
15BD_213	15BD213_121	246	71.5	0	84307	0.11641	0.00156	4.25416	0.07308	0.265045	0.002862	0.629	-22.8	-19.9	1902	24	1685	14	1516	15
15BD_213	15BD213_85	146	35.1	0	1291	0.11651	0.00274	4.70191	0.15854	0.292697	0.007065	0.716	-14.8	-8.6	1903	40	1768	28	1655	35
15BD_213	15BD213_93	1672	210.6	0	941	0.13604	0.00284	2.63758	0.10279	0.14062	0.004625	0.844	-65	-62.6	2177	35	1311	29	848	26
15BD_213	15BD213_61	243	66.4	0	39806	0.16505	0.00117	8.80482	0.18057	0.386916	0.007442	0.938	-18.6	-16.8	2508	11	2318	19	2109	35
15BD_213	15BD213_76_2	22	6.1	0	2278	0.16552	0.00134	9.21984	0.26104	0.40398	0.010958	0.958	-15.3	-13.1	2513	13	2360	26	2187	50
15BD_213	15BD213_175	340	90.4	0	1913	0.17211	0.00148	5.45031	0.12945	0.229681	0.005084	0.932	-53.3	-52	2578	14	1893	20	1333	27
15BD_213	15BD213_09	300	106.3	0	16089	0.17813	0.00107	10.2631	0.20105	0.417883	0.007793	0.952	-17.3	-15.7	2635	10	2459	18	2251	35
15BD_213	15BD213_57	30	9.3	0	6889	0.17816	0.00137	10.5957	0.23004	0.431347	0.008761	0.935	-14.6	-12.6	2636	12	2488	20	2312	39
15BD_213	15BD213_27	20	2.5	0	2270	0.17938	0.00231	6.91294	0.25989	0.279501	0.00987	0.939	-45	-42.7	2647	20	2100	33	1589	50
15BD_213	15BD213_179	200	108.1	0	32707	0.18373	0.00157	11.4313	0.23407	0.45125	0.008394	0.909	-12.7	-10.5	2687	14	2559	19	2401	37
15BD_213	15BD213_70	197	47.1	0	5821	0.18423	0.00142	8.72928	0.17229	0.343643	0.006247	0.921	-33.7	-32.1	2691	12	2310	18	1904	30
15BD_213	15BD213_02	439	33.5	0	107	0.18585	0.00482	2.40456	0.07051	0.093837	0.001287	0.468	-82	-81.1	2706	41	1244	21	578	8
15BD_213	15BD213_83	122	56.2	0	17970	0.1884	0.0044	16.7225	0.72228	0.643742	0.023395	0.841	22.2	12.4	2728	36	2919	41	3204	92
15BD_213	15BD213_89	390	108.2	0	1652	0.18843	0.00441	9.06549	0.33102	0.348927	0.009774	0.767	-33.8	-29.6	2729	37	2345	33	1929	47
15BD_213	15BD213_166	23	13.1	0	4205	0.19227	0.00176	12.4402	0.28472	0.46927	0.009847	0.917	-12.3	-9.8	2762	15	2638	22	2480	43
15BD_213	15BD213_118	115	64.4	0	13815	0.19484	0.00328	12.9179	0.26935	0.480864	0.005905	0.589	-10.9	-7.8	2783	27	2674	20	2531	26
15BD_213	excluded15BD213_59	6	0.7	0	716	0.07323	0.00114	1.79768	0.04698	0.17804	0.003746	0.805	3.8	.	1020	30	1045	17	1056	20
15BD_213	excluded15BD213_100	38	5.9	0	1521	0.07388	0.001	1.80301	0.04327	0.176992	0.003502	0.824	1.3	.	1038	26	1047	16	1051	19
15BD_213	excluded15BD213_190	25	6.5	0	1586	0.08759	0.0006	2.76742	0.0448	0.229145	0.003359	0.906	-3.5	-0.5	1374	13	1347	12	1330	18
15BD_213	excluded15BD213_72	31	3.5	0	1869	0.07585	0.00062	1.77994	0.03357	0.170202	0.002887	0.9	-7.7	-3.6	1091	16	1038	12	1013	16
15BD_213	excluded15BD213_23	120	35.2	0	95021	0.19171	0.00258	15.3345	0.63908	0.580127	0.022878	0.946	8.7	.	2757	21	2836	40	2949	93
15BD_213	excluded15BD213_18	82	11.8	0	8365	0.07599	0.00036	1.8482	0.02485	0.176402	0.002223	0.937	-4.7	-2.2	1095	9	1063	9	1047	12
15BD_213	excluded15BD213_14	172	72.2	0	20952	0.18266	0.00111	12.3977	0.26744	0.492266	0.010186	0.959	-4.4	-2.6	2677	10	2635	20	2580	44
15BD_213	excluded15BD213_17	69	30.6	0	13379	0.18956	0.0012	13.4583	0.29534	0.514928	0.010823	0.958	-2.7	-0.8	2738	10	2712	21	2678	46
15BD_213	excluded15BD213_20	258	116.7	0	25303	0.19171	0.00122	13.8125	0.33069	0.522557	0.012061	0.964	-2.1	-0.2	2757	10	2737	23	2710	51
15BD_213	excluded15BD213_16	90	15.4	0	6655	0.0781	0.00035	2.25265	0.03104	0.209188	0.002726	0.946	7.2	3.9	1149	9	1198	10	1224	15
15BD_213	excluded15BD213_13	102	21.2	0	10383	0.09728	0.00046	3.36998	0.05646	0.251239	0.004039	0.96	-9.1	-7.3	1573	9	1497	13	1445	21
15BD_213	excluded15BD213_15	842	55.7	0	13183	0.05741	0.00021	0.6442	0.01036	0.081389	0.001274	0.973	-0.6	.	507	8	505	6	504	8
15BD_213	excluded15BD213_26	49	3.8	0	4491	0.19643	0.00265	5.02513	0.19725	0.185538	0.00684	0.939	-65.8	-64.4	2797	22	1824	33	1097	37
15BD_213	excluded15BD213_25	291	25.6	0	6330	0.18859	0.0025	5.28272	0.19757	0.203164	0.007106	0.935	-61.5	-59.9	2730	22	1866	32	1192	38
15BD_213	excluded15BD213_22	41	11.9	0	10718	0.17325	0.00221	13.4613	0.54722	0.563513	0.021754	0.95	14	3.8	2589	20	2713	38	2881	90
15BD_213	excluded15BD213_33	79	4.3	0	5204	0.17538	0.00223	3.33411	0.12908	0.137876	0.005042	0.945	-72.4	-71.3	2610	21	1489	30	833	29
15BD_213	excluded15BD213_34	49	1.6	0	855	0.11525	0.0015	1.37666	0.05499	0.086632	0.00327	0.945	-74.5	-73.2	1884	23	879	23	536	19
15BD_213	excluded15BD213_35	24	0.8	0	792	0.10458	0.00154	1.28476	0.05234	0.089095	0.003384	0.932	-70.6	-68.9	1707	27	839	23	550	20
15BD_213	excluded15BD213_38	84	2.4	0	11132	0.10485	0.00124	1.06721	0.04137	0.073819	0.002725	0.953	-75.7	-74.6	1712	21	737	20	459	16
15BD_213	excluded15BD213_21	6	2.3	0	888	0.10624	0.00082	6.55968	0.27943	0.447805	0.018761	0.984	44.9	30.7	1736	13	2054	38	2385	84
15BD_213	excluded15BD213_32	22	1	0	1288	0.10944	0.00141	1.72672	0.06585	0.114427	0.004106	0.941	-64.3	-62.4	1790	23	1019	25	698	24
15BD_213	excluded15BD213_31	323	2.9	0	346	0.08807	0.00107	0.28112	0.01078	0.023151	0.000842	0.948	-90.3	-89.8	1384	21	252	9	148	5
15BD_213	excluded15BD213_29	42	1	0	6589	0.06891	0.00099	0.57552	0.02199	0.060571	0.002144	0.927	-59.4	-55.5	896	28	462	14	379	13
15BD_213	excluded15BD213_28	262	4.2	0	11774	0.05674	0.0006	0.30552	0.0106	0.039055	0.001291	0.952	-49.6	-43.3	481	23	271	8	247	8
14BD_17	14BD_17_134	508	31.7	0	16208	0.05725	0.00023	0.63817	0.00734	0.080852	0.000869	0.935	0	.	501	9	501	5	501	5
14BD_17	14BD_17_55	694	63.8	0	28429	0.05653	0.00031	0.61989	0.01211	0.079529	0.001489	0.959	4.4	.	473	12	490	8	493	9
14BD_17	14BD_17_179	367	74.2	0	19186	0.07524	0.00051	1.95642	0.03457	0.188589	0.003082	0.925	3.9	.	1075	13	1101	12	1114	17
14BD_17	14BD_17_160	1079	94.4	0	37166	0.057	0.00032	0.64682	0.01034	0.082299	0.001233	0.937	3.8	.	492	11	507	6	510	7
14BD_17	14BD_17_175	597	209.2	0	214888	0.1069	0.0008	4.7	0.09783	0.321163	0.006183	0.931	3.2	.	1747	13	1773	17	1795	30
14BD_17	14BD_17_75	280	20.4	0	7931	0.05698	0.00036	0.64117	0.00833	0.081605	0.000928	0.875	3.1	.	491	13	503	5	506	6
14BD_17	14BD_17_45	94	19.8	0	7970	0.07411	0.00044	1.84746	0.03729	0.180804	0.003489	0.956	2.8	.	1044	11	1063	13	1071	19
14BD_17	14BD_17_131	407	84.5	0	46166	0.09156	0.00034	3.27437	0.04616	0.259382	0.003528	0.965	2.2	.	1458	7	1475	11	1487	18
14BD_17	14BD_17_110	55	7.7	0	4623	0.07369	0.00034	1.79094	0.02264	0.176278	0.002072	0.93	1.4	.	1033	9	1042	8	1047	11
14BD_17	14BD_17_155	172	30.4	0	21010	0.0714	0.00044	1.61859	0.02528	0.164413	0.002359	0.919	1.4	.	969	12	977	10	981	13
14BD_17	14BD_17_94	145	22.5	0	11868	0.07348	0.0004	1.76932	0.01574	0.17464	0.001223	0.787	1.1	.	1027	11	1034	6	1038	7
14BD_17	14BD_17_130	104	14.1	0	6419	0.07297	0.00031	1.72965	0.0217	0.171913	0.002028	0.94	1	.	1013	8	1020	8	1023	11
14BD_17	14BD_17_150	125	25.7	0	19851	0.09142	0.00038	3.2196	0.04614	0.255427	0.003504	0.957	0.9	.	1455	8	1462	11	1466	18
14BD_17	14BD_17_36	765	71.2	0	30040	0.05694	0.00032	0.62347	0.01164	0.07942	0.001414	0.954	0.8	.	489	12	492	7	493	8
14BD_17	14BD_17_170	651	55.6	0	17689	0.05712	0.00036	0.63468	0.01016	0.080582	0.001184	0.918	0.7	.	496	14	499	6	500	7
14BD_17	14BD_17_79	74	12	0	5133	0.07511	0.0004	1.88062	0.0175	0.1816	0.001389	0.822	0.4	.	1071	10	1074	6	1076	8
14BD_17	14BD_17_140	404	105.1	0	127132	0.10887	0.00043	4.79125	0.07365	0.319179	0.004745	0.967	0.3	.	1781	7	1783	13	1786	23
14BD_17	14BD_17_65	98	20.3	0	8921	0.0746	0.00046	1.83816	0.03807	0.178706	0.003534	0.955	0.2	.	1058	12	1059	14	1060	19
14BD_17	14BD_17_80	778	55.9	0	26729	0.0572	0.00026	0.63637	0.00802	0.080692	0.000952	0.935	0.2	.	499	10	500	5	500	6
14BD_17	14BD_17_Plot_data	314	86.9	0	162977	0.11435	0.00046	5.3171	0.08893	0.337241	0.005472	0.97	0.2	.	1870	7	1872	14	1873	26
14BD_17	14BD_17_88	31	5.6	0	2729	0.07944	0.00051	2.20171	0.02044	0.201001	0.001343	0.719	-0.2	.	1183	13	1182	6	1181	7
14BD_17	14BD_17_143	186	48.3	0	25831	0.10926	0.00045	4.80192	0.07488	0.318761	0.004794	0.964	-0.2	.	1787	7	1785	13	1784	23
14BD_17	14BD_17_185	254	94.8	0	46301	0.11542	0.00092	5.39886	0.11816	0.33926	0.006915	0.931	-0.2	.	1886	14	1885	19	1883	33
14BD_17	14BD_17_60	227	78.3	0	32571	0.10206	0.00067	4.1	0.09956	0.292353	0.006813	0.963	-0.6	.	1662	11	1657	20	1653	34
14BD_17	14BD_17_92	174	30.2	0	18723	0.0782	0.0004	2.1	0.01767	0.1944	0.001298	0.792	-0.6	.	1152	10	1148	6	1145	7
14BD_17	14BD_17_68	137	26.5	0	13700	0.07288	0.00044	1.69322	0.03535	0.168513	0.003371	0.958	-0.7	.	1010	12	1006	13	1004	19
14BD_17	14BD_17_106	173	43.5	0	25952	0.10675	0.00044	4.53924	0.06888	0.308402	0.004507	0.963	-0.8	.	1745	7	1738	13	1733	22
14BD_17	14BD_17_39	224	49.9	0	23490	0.07716	0.00047	2.00531	0.04226	0.188494	0.003805	0.958	-1.2	.	1125	12	1117	14	1113	21
14BD_17	14BD_17_41	123	47.6	0	20040	0.11138	0.00079	4.94783	0.12499	0.322175	0.007815	0.96	-1.4	.	1822	12	1810	21	1800	38
14BD_17	14BD_17_178	74	16.9	0	7495	0.08235	0.00061	2.39179	0.04299	0.210644	0.003452	0.912	-1.9	.	1254	14	1240	13	1232	18
14BD_17	14BD_17_172	301	25.1	0	11914	0.05727	0.00038	0.62566	0.00981	0.079235	0.001128	0.907	-2.1	.	502	14	493	6	492	7
14BD_17	14BD_17_159	55	11.7	0	7416	0.07924	0.00053	2.1395	0.03433	0.195813	0.002852	0.908	-2.4	.	1178	13	1162	11	1153	15
14BD_17	14BD_17_57	106	42.1	0	16621	0.11683	0.00082	5.39225	0.13853	0.334744	0.008273	0.962	-2.8	-0.3	1908	12	1884	22	1861	40
14BD_17	14BD_17_76	36	11.7	0	6762	0.12107	0.00073	5.79937	0.06273	0.347408	0.003117	0.829	-2.9	-1	1972	11	1946	9	1922	15
14BD_17	14BD_17_70	104	8.2	0	4568	0.05902	0.00036	0.72671	0.00824	0.089302	0.00085	0.839	-3	.	568	13	555	5	551	5
14BD_17	14BD_17_44	31	12	0	5987	0.11376	0.00082	5.1	0.12929	0.323704	0.007903	0.959	-3.2	-0.6	1860	13	1832	22	1808	38
14BD_17	14BD_17_151	71	4.7	0	2257	0.05856	0.00038	0.69279	0.00981	0.085796	0.001082	0.89	-3.8	.	551	13	534	6	531	6
14BD_17	14BD_17_166	1721	152.7	0	12261	0.05822	0.00037	0.67177	0.0103	0.083687	0.001166	0.908	-3.9	.	538	14	522	6	518	7
14BD_17	14BD_17_48	89	53.9	0	22199	0.18245	0.00181	12.3765	0.4208	0.49198	0.016001	0.957	-4.4	-1.4	2675	16	2633	32	2579	69
14BD_17	14BD_17_84	679	47.8	0	22995	0.05604	0.00026	0.61471	0.00737	0.079556	0.000878	0.92	9.1	3.5	454	10	487	5	493	5
14BD_17	14BD_17_152	255	15.7	0	13624	0.05635	0.00023	0.62323	0.00773	0.080221	0.000941	0.945	7	2.2	466	9	492	5	497	6
14BD_17	14BD_17_129	370	23	0	14799	0.05657	0.00022	0.62893	0.00755	0.080629	0.000915	0.946	5.5	0.9	475	8	495	5	500	5
14BD_17	14BD_17_43	799	75.8	0	30021	0.05662	0.00032	0.63742	0.01195	0.081643	0.001461	0.955	6.3	.	477	12	501	7	506	9
14BD_17	14BD_17_149	693	43.9	0	22787	0.05665	0.00021	0.64131	0.00785	0.082101	0.000957	0.952	6.7	2.2	478	8	503	5	509	6
14BD_17	14BD_17_146	1945	126.6	0	24966	0.0567	0.00019	0.65353	0.00984	0.083588	0.001227	0.975	8.1	3.5	480	7	511	6	518	7
14BD_17	14BD_17_186	971	85.8	0	19626	0.05703	0.00038	0.66068	0.01128	0.084023	0.001323	0.922	5.8	.	493	14	515	7	520	8
14BD_17	14BD_17_168	1134	101.4	0	65968	0.05718	0.00033	0.66745	0.01141	0.084655	0.001363	0.942	5.3	.	499	12	519	7	524	8
14BD_17	14BD_17_49	276	24.9	0	6151	0.05768	0.00035	0.62526	0.01162	0.078615	0.001382	0.946	-6	.	518	13	493	7	488	8
14BD_17	14BD_17_63	1291	119	0	7408	0.05782	0.00032	0.63294	0.01505	0.079399	0.001837	0.973	-6	-0.5	523	11	498	9	493	11
14BD_17	14BD_17_59	362	33	0	9481	0.05817	0.0005	0.63941	0.01267	0.079724	0.001423	0.9	-8.1	-0.1	536	19	502	8	494	8
14BD_17	14BD_17_126	467	29.7	0	10519	0.05827	0.0003	0.6644	0.00833	0.082701	0.000947	0.913	-5.3	-0.5	540	11	517	5	512	6
14BD_17	14BD_17_116	1223	78.8	0	8259	0.05897	0.00023	0.67657	0.00919	0.083211	0.001082	0.958	-9.3	-5.9	566	8	525	6	515	6
14BD_17	14BD_17_85	119	26.2	0	13083	0.09236	0.00051	3.09704	0.02888	0.243206	0.001818	0.801	-5.4	-3.3	1475	10	1432	7	1403	9
14BD_17	14BD_17_156	191	53.7	0	191137	0.10018	0.0007	3.59675	0.07327	0.260388	0.004986	0.94	-9.3	-6.7	1627	12	1549	16	1492	25
14BD_17	14BD_17_105	240	61.9	0	24758	0.1154	0.00047	5.04649	0.07669	0.317175	0.004643	0.963	-6.7	-5.2	1886	7	1827	13	1776	23
14BD_17	14BD_17_37	35	19.8	0	13490	0.1786	0.00171	11.5167	0.37968	0.467678	0.014757	0.957	-7.6	-4.8	2640	15	2566	31	2473	65
14BD_17	14BD_17_133	99	40.9	0	22567	0.18676	0.00099	12.4868	0.2592	0.48492	0.009735	0.967	-7.4	-5.9	2714	8	2642	20	2549	42
14BD_17	14BD_17_108	94	39.8	0	21410	0.19048	0.00109	12.9996	0.28065	0.494969	0.010306	0.964	-6.8	-5.2	2746	9	2680	20	2592	44
14BD_17	14BD_17_117	132	55.5	0	27069	0.19115	0.00103	12.9462	0.26993	0.491218	0.009891	0.966	-7.8	-6.2	2752	8	2676	20	2576	43
14BD_17	14BD_17_100	25	11.7	0	16696	0.19817	0.00166	13.5947	0.18248	0.497534	0.00521	0.78	-9	-7	2811	14	2722	13	2603	22
14BD_17	14BD_17_180	115	78.9	0	28782	0.25264	0.00334	20.798	0.66913	0.59706	0.017517	0.912	-7.2	-3.7	3201	21	3129	31	3018	71
14BD_17	14BD_17_123	1172	77.8	0	39994	0.05643	0.00018	0.66627	0.00819	0.085628	0.001015	0.964	13.4	8.9	469	7	518	5	530	6
14BD_17	14BD_17_153	662	63.8	0	23869	0.05688	0.00032	0.70715	0.01084	0.09016	0.001283	0.928	14.9	8.2	487	12	543	6	556	8
14BD_17	14BD_17_161	649	55.3	0	15851	0.05859	0.00035	0.6	0.00942	0.080216	0.001066	0.914	-10.3	-5.1	552	12	507	6	497	6
14BD_17	14BD_17_142	901	57.4	0	6938	0.06037	0.00036	0.683	0.00971	0.082055	0.001058	0.907	-18.3	-14	617	13	529	6	508	6
14BD_17	14BD_17_74	187	12.3	0	5294	0.06038	0.00048	0.61911	0.00755	0.074368	0.000691	0.762	-26	-21.2	617	16	489	5	462	4
14BD_17	14BD_17_174	1032	90.7	0	5198	0.06185	0.00046	0.70642	0.01176	0.082835	0.001231	0.893	-24.2	-19.6	669	16	543	7	513	7
14BD_17	14BD_17_109	420	26.5	0	3313	0.06282	0.00039	0.70495	0.00909	0.081391	0.000919	0.875	-29.3	-25.9	702	13	542	5	504	5
14BD_17	14BD_17_184	253	33.1	0	5833	0.0778	0.00081	1.39149	0.03743	0.129712	0.003217	0.922	-33.1	-29.3	1142	20	885	16	786	18
14BD_17	14BD_17_114	179	24.4	0	8011	0.08119	0.0003	1.94053	0.02634	0.173346	0.002265	0.962	-17.3	-15.7	1226	7	1095	9	1031	12
14BD_17	14BD_17_112	819	121.8	0	12042	0.08556	0.00033	2.2	0.03544	0.18628	0.002919	0.972	-18.6	-17.1	1328	7	1180	11	1101	16
14BD_17	14BD_17_118	168	29.5	0	14821	0.09101	0.00039	2.81002	0.05454	0.223936	0.004241	0.976	-11	-9.3	1447	8	1358	15	1303	22
14BD_17	14BD_17_91	101	20.8	0	9605	0.09846	0.0006	3.11995	0.04261	0.229822	0.002805	0.894	-18.1	-16.1	1595	11	1438	11	1334	15
14BD_17	14BD_17_66	97	17.7	0	5753	0.10086	0.00088	2.27265	0.06505	0.163424	0.004456	0.953	-43.6	-41.5	1640	16	1204	20	976	25
14BD_17	14BD_17_47	214	28.7	0	348	0.10413	0.00259	1.66452	0.0512	0.11593	0.002106	0.59	-61.6	-58.7	1699	43	995	20	707	12
14BD_17	14BD_17_173	159	43.1	0	12470	0.10876	0.00088	3.77426	0.07675	0.251697	0.004691	0.917	-20.8	-18.3	1779	15	1587	16	1447	24
14BD_17	14BD_17_141	430	92.7	0	19406	0.11016	0.00044	4.06671	0.05945	0.267731	0.003763	0.961	-17	-15.7	1802	7	1648	12	1529	19
14BD_17	14BD_17_58	333	101.1	0	23940	0.11117	0.00075	3.98739	0.0933	0.260138	0.00583	0.958	-20.2	-18.1	1819	12	1632	19	1491	30
14BD_17	14BD_17_69	119	11.5	0	263	0.11327	0.0043	1.31471	0.05612	0.084179	0.001638	0.456	-74.7	-72	1853	65	852	25	521	10
14BD_17	14BD_17_163	229	71.9	0	126959	0.11493	0.00084	4.54261	0.08457	0.286651	0.004913	0.921	-15.3	-13	1879	12	1739	15	1625	25
14BD_17	14BD_17_119	791	97	0	2726	0.14278	0.00101	3.10401	0.04641	0.157669	0.002074	0.88	-62.5	-61.6	2261	12	1434	11	944	12
14BD_17	14BD_17_127	538	125.6	0	8456	0.14725	0.00133	5.7	0.21127	0.28193	0.010088	0.969	-34.7	-32.8	2314	16	1935	32	1601	51
14BD_17	14BD_17_120	555	78	0	1383	0.1486	0.00127	3.57575	0.10353	0.174517	0.004827	0.955	-59.9	-58.8	2330	14	1544	23	1037	26
14BD_17	14BD_17_69	288	34.6	0	763	0.15808	0.00155	2.94088	0.05349	0.134926	0.002064	0.841	-70.6	-69.7	2435	16	1393	14	816	12
14BD_17	14BD_17_169	89	32	0	12408	0.15811	0.00163	7.55862	0.27602	0.346726	0.012148	0.959	-24.5	-21.9	2436	17	2180	33	1919	58
14BD_17	14BD_17_144_core	402	98.3	0	28242	0.16021	0.00084	6.71034	0.12464	0.303776	0.005415	0.96	-34.6	-33.5	2458	9	2074	16	1710	27
14BD_17	14BD_17_183	180	47.1	0	14017	0.16273	0.00166	5.47121	0.12197	0.243841	0.004833	0.889	-48.1	-46.5	2484	17	1896	19	1407	25
14BD_17	14BD_17_78	231	92.3	0	69728	0.1662	0.00146	9.7	0.13354	0.425439	0.004468	0.767	-11	-8.9	2520	15	2411	13	2285	20
14BD_17	14BD_17_144_rim	169	60.7	0	35957	0.16751	0.00085	9.89401	0.19682	0.428392	0.00824	0.967	-11	-9.6	2533	8	2425	18	2298	37
14BD_17	14BD_17_136	262	95.1	0	53214	0.17031	0.00086	10.1688	0.19621	0.433045	0.008068	0.966	-11.2	-9.8	2561	8	2450	18	2319	36
14BD_17	14BD_17_32	63	33.2	0	15542	0.17111	0.00158	10.1578	0.31272	0.430547	0.012642	0.954	-12	-9.5	2569	15	2449	28	2308	57
14BD_17	14BD_17_145	246	89.5	0	42677	0.17248	0.00087	10.302	0.19835	0.433196	0.008052	0.965	-12.1	-10.7	2582	8	2462	18	2320	36
14BD_17	14BD_17_67	104	52	0	46907	0.17632	0.00158	10.1786	0.30647	0.418678	0.012034	0.955	-16.5	-14.1	2619	14	2451	28	2254	55
14BD_17	14BD_17_95	84	25.7	0	13150	0.17879	0.00155	8.39486	0.18732	0.340547	0.007005	0.922	-32.8	-31	2642	14	2275	20	1889	34
14BD_17	14BD_17_98	191	58.6	0	28400	0.17923	0.00141	8.20777	0.11625	0.33213	0.003911	0.831	-34.6	-33.1	2646	13	2254	13	1849	19
14BD_17	14BD_17_138	155	57.6	0	21839	0.19242	0.00114	11.7234	0.23904	0.441873	0.008619	0.957	-17.4	-15.9	2763	9	2583	19	2359	39
14BD_17	14BD_17_83	112	29.7	0	128	0.19782	0.003	7.88408	0.14376	0.289052	0.002921	0.554	-47.1	-45.5	2808	24	2218	16	1637	15
14BD_17	14BD_17_73	104	36.1	0	13775	0.20581	0.00178	10.7199	0.17804	0.377776	0.005351	0.853	-32.7	-31.1	2873	13	2499	15	2066	25
14BD_17	14BD_17_128	193	97.8	0	54547	0.28815	0.00345	23.3313	0.7086	0.587243	0.016389	0.919	-15.7	-12.9	3408	18	3241	30	2978	67
14BD_58	14BD_58-35	213	15.7	0	240	0.05639	0.00055	0.59853	0.00976	0.076974	0.001011	0.805	2.2	.	468	21	476	6	478	6
14BD_58	14BD_58-147	678	55.4	0	2543	0.05656	0.0003	0.61574	0.01132	0.078963	0.001391	0.958	3.4	.	474	11	487	7	490	8
14BD_58	14BD_58-204	301	22.7	0	613	0.05656	0.00031	0.60157	0.0069	0.07714	0.000775	0.876	1	.	474	12	478	4	479	5
14BD_58	14BD_58-166	422	34.3	0	1063	0.05661	0.00033	0.61084	0.01194	0.07826	0.001461	0.955	2.1	.	476	12	484	8	486	9
14BD_58	14BD_58-181	386	29.2	0	1030	0.05665	0.0003	0.59736	0.00692	0.076478	0.000787	0.889	-0.6	.	478	11	476	4	475	5
14BD_58	14BD_58-199	181	13.2	0	324	0.05666	0.00033	0.57818	0.00682	0.07401	0.000761	0.872	-3.9	.	478	13	463	4	460	5
14BD_58	14BD_58-100	892	72.3	0	1606	0.05672	0.0005	0.62019	0.01347	0.079301	0.001573	0.913	2.4	.	481	19	490	8	492	9
14BD_58	14BD_58-173	772	61.3	0	2033	0.05683	0.00028	0.62009	0.00705	0.079141	0.00081	0.9	1.3	.	485	11	490	4	491	5
14BD_58	14BD_58-209	340	25.6	0	793	0.05741	0.00034	0.61604	0.0081	0.077827	0.000916	0.895	-4.9	.	507	12	487	5	483	5
14BD_58	14BD_58-254	459	82.6	0	1651	0.07217	0.00055	1.71848	0.02024	0.172695	0.001543	0.759	3.9	0.2	991	15	1015	8	1027	8
14BD_58	14BD_58-180	71	11.7	0	495	0.07268	0.00042	1.62396	0.02016	0.162054	0.001777	0.884	-3.9	-0.8	1005	11	980	8	968	10
14BD_58	14BD_58-271	127	22.1	0	342	0.07275	0.0006	1.66709	0.02165	0.1662	0.001664	0.771	-1.7	.	1007	16	996	8	991	9
14BD_58	14BD_58-87	42	6.3	0	271	0.0729	0.00061	1.71307	0.03071	0.170425	0.002708	0.886	0.3	.	1011	16	1013	11	1014	15
14BD_58	14BD_58-73	154	23.7	0	800	0.07318	0.00053	1.73694	0.02932	0.172155	0.00262	0.902	0.5	.	1019	14	1022	11	1024	14
14BD_58	14BD_58-261	117	20.9	0	489	0.07327	0.00059	1.72667	0.02097	0.170925	0.001552	0.748	-0.4	.	1021	16	1019	8	1017	9
14BD_58	14BD_58-174	205	36	0	1219	0.0735	0.00039	1.734	0.02107	0.17111	0.001869	0.899	-1	.	1028	11	1021	8	1018	10
14BD_58	14BD_58-169	103	18.2	0	844	0.07362	0.00041	1.74409	0.02149	0.171826	0.001892	0.894	-0.9	.	1031	11	1025	8	1022	10
14BD_58	14BD_58-182	274	47.9	0	1606	0.07369	0.00039	1.75187	0.02137	0.172423	0.001894	0.9	-0.8	.	1033	10	1028	8	1025	10
14BD_58	14BD_58-123	27	4.9	0	91	0.07372	0.00084	1.77954	0.04227	0.175081	0.003644	0.876	0.7	.	1034	22	1038	15	1040	20
14BD_58	14BD_58-102	72	13.1	0	417	0.07379	0.00074	1.78961	0.03856	0.175887	0.00336	0.886	0.9	.	1036	20	1042	14	1044	18
14BD_58	14BD_58-171	196	34.8	0	1267	0.07398	0.00039	1.76314	0.02207	0.172852	0.001966	0.909	-1.4	.	1041	10	1032	8	1028	11
14BD_58	14BD_58-267	126	23.2	0	480	0.07405	0.00061	1.79932	0.0225	0.176229	0.001654	0.75	0.4	.	1043	16	1045	8	1046	9
14BD_58	14BD_58-37	81	13.5	0	224	0.07421	0.00076	1.76304	0.03245	0.172301	0.002638	0.832	-2.3	.	1047	20	1032	12	1025	15
14BD_58	14BD_58-143	274	51.5	0	2780	0.07454	0.00041	1.83209	0.03718	0.178273	0.00348	0.962	0.2	.	1056	11	1057	13	1058	19
14BD_58	14BD_58-74	254	40.9	0	1302	0.07468	0.00055	1.85247	0.03095	0.179901	0.002699	0.898	0.7	.	1060	14	1064	11	1066	15
14BD_58	14BD_58-239	449	83.5	0	1699	0.07472	0.00057	1.84517	0.02136	0.17909	0.001564	0.754	0.1	.	1061	14	1062	8	1062	9
14BD_58	14BD_58-216	89	15.8	0	507	0.07503	0.00047	1.85677	0.02697	0.179486	0.00235	0.901	-0.5	.	1069	13	1066	10	1064	13
14BD_58	14BD_58-222	86	15.2	0	430	0.07511	0.00046	1.88481	0.02711	0.182005	0.00237	0.905	0.7	.	1071	12	1076	10	1078	13
14BD_58	14BD_58-131	220	42.1	0	645	0.07524	0.00041	1.89069	0.03742	0.182251	0.003465	0.961	0.4	.	1075	11	1078	13	1079	19
14BD_58	14BD_58-41	94	15.7	0	155	0.07524	0.00078	1.79755	0.03153	0.17328	0.002457	0.808	-4.5	.	1075	21	1045	11	1030	13
14BD_58	14BD_58-99	70	13.3	0	432	0.07592	0.00074	1.96032	0.04209	0.18727	0.003584	0.892	1.4	.	1093	19	1102	14	1107	19
14BD_58	14BD_58-45	104	18.8	0	196	0.07663	0.0008	1.98305	0.03553	0.187685	0.002729	0.812	-0.3	.	1112	20	1110	12	1109	15
14BD_58	14BD_58-137	413	82.6	0	1810	0.07722	0.00043	2.02433	0.04067	0.190128	0.003673	0.961	-0.5	.	1127	11	1124	14	1122	20
14BD_58	14BD_58-196	70	13.2	0	283	0.07802	0.00045	2	0.02561	0.187213	0.002122	0.891	-3.9	-1	1147	12	1120	9	1106	12
14BD_58	14BD_58-219	114	21.9	0	616	0.07805	0.00045	2.09562	0.02871	0.194724	0.002422	0.908	-0.1	.	1148	11	1147	9	1147	13
14BD_58	14BD_58-215	92	17.7	0	539	0.07821	0.00047	2.1045	0.02916	0.195152	0.00244	0.903	-0.3	.	1152	12	1150	10	1149	13
14BD_58	14BD_58-192	269	54.8	0	1130	0.079	0.00044	2.18755	0.02936	0.200829	0.002455	0.911	0.7	.	1172	10	1177	9	1180	13
14BD_58	14BD_58-262	279	62.2	0	1476	0.08068	0.00065	2.4	0.02983	0.212378	0.002055	0.767	2.5	.	1214	16	1231	9	1241	11
14BD_58	14BD_58-91	312	61.8	0	2749	0.08413	0.00071	2.56422	0.04849	0.221068	0.003736	0.894	-0.7	.	1295	16	1290	14	1288	20
14BD_58	14BD_58-15	130	28.5	0	600	0.08435	0.00086	2.5	0.04505	0.21823	0.003177	0.82	-2.4	.	1301	19	1283	13	1273	17
14BD_58	14BD_58-81	175	34.9	0	1444	0.08511	0.00066	2.60472	0.04792	0.221959	0.003701	0.906	-2.2	.	1318	14	1302	13	1292	20
14BD_58	14BD_58-256	119	27.4	0	621	0.08546	0.00071	2.57773	0.03399	0.218755	0.002233	0.774	-4.2	-0.9	1326	15	1294	10	1275	12
14BD_58	14BD_58-80b	235	49.4	0	1999	0.08551	0.00066	2.8	0.0508	0.233549	0.003913	0.908	2.2	.	1327	14	1343	14	1353	20
14BD_58	14BD_58-133	184	43.1	0	675	0.08584	0.00052	2.62572	0.05543	0.221851	0.004486	0.958	-3.5	-0.7	1335	11	1308	16	1292	24
14BD_58	14BD_58-118	104	25.3	0	545	0.08669	0.00092	2.78072	0.0663	0.232644	0.004974	0.897	-0.4	.	1354	20	1350	18	1348	26
14BD_58	14BD_58-115	96	23.2	0	683	0.08724	0.00092	2.80079	0.06652	0.232843	0.004953	0.896	-1.3	.	1366	20	1356	18	1349	26
14BD_58	14BD_58-77	72	14.9	0	613	0.08734	0.00069	2.74866	0.04912	0.228236	0.003655	0.896	-3.5	.	1368	15	1342	13	1325	19
14BD_58	14BD_58-165	277	70.8	0	2131	0.08767	0.00053	2.87583	0.06657	0.237899	0.005316	0.965	0	.	1375	11	1376	17	1376	28
14BD_58	14BD_58-127	233	57.6	0	560	0.08814	0.00051	2.83897	0.06015	0.233604	0.004761	0.962	-2.6	.	1386	11	1366	16	1353	25
14BD_58	14BD_58-140	154	38.8	0	827	0.08937	0.00055	2.92645	0.06351	0.237494	0.00494	0.959	-3	-0.3	1412	12	1389	16	1374	26
14BD_58	14BD_58-145	37	9.3	0	287	0.0897	0.00059	2.94973	0.06738	0.238509	0.005219	0.958	-3.1	-0.2	1419	13	1395	17	1379	27
14BD_58	14BD_58-224	187	46.5	0	1191	0.09078	0.00055	3.13398	0.04524	0.250384	0.003281	0.908	-0.1	.	1442	11	1441	11	1440	17
14BD_58	14BD_58-80	153	34.2	0	1616	0.09122	0.00072	3.10961	0.05755	0.247233	0.004143	0.906	-2.1	.	1451	14	1435	14	1424	21
14BD_58	14BD_58-259	358	92.1	0	1841	0.09153	0.00077	3.07237	0.04324	0.24345	0.002748	0.802	-4	-0.8	1458	15	1426	11	1405	14
14BD_58	14BD_58-63	56	12.5	0	353	0.0916	0.00074	3.09464	0.05903	0.24502	0.004236	0.906	-3.5	-0.1	1459	15	1431	15	1413	22
14BD_58	14BD_58-238	147	43.3	0	1058	0.10051	0.00086	3.86936	0.05171	0.27921	0.002857	0.766	-3.2	-0.2	1634	15	1607	11	1587	14
14BD_58	14BD_58-64	49	13.5	0	375	0.10234	0.00086	4.2	0.09421	0.298354	0.006185	0.926	1.1	.	1667	15	1676	18	1683	31
14BD_58	14BD_58-124	272	91.2	0	1315	0.10622	0.00123	4.54961	0.12615	0.310654	0.007833	0.909	0.6	.	1735	21	1740	23	1744	39
14BD_58	14BD_58-265	474	160.9	0	3300	0.10781	0.00098	4.71785	0.06754	0.317384	0.003521	0.775	0.9	.	1763	16	1770	12	1777	17
14BD_58	14BD_58-195	139	44.7	0	1399	0.11032	0.0007	4.69302	0.07034	0.308529	0.004196	0.907	-4.5	-2.2	1805	11	1766	13	1733	21
14BD_58	14BD_58-03	162	51.3	0	932	0.11041	0.00124	4.68106	0.09548	0.307479	0.005229	0.834	-4.9	-1.1	1806	19	1764	17	1728	26
14BD_58	14BD_58-258	318	107.1	0	1960	0.11066	0.00101	4.83171	0.0684	0.316669	0.003432	0.766	-2.3	.	1810	16	1790	12	1773	17
14BD_58	14BD_58-94	34	11.1	0	282	0.11101	0.00127	4.81335	0.12513	0.314466	0.007347	0.899	-3.4	.	1816	21	1787	22	1763	36
14BD_58	14BD_58-148	219	74.8	0	2499	0.11152	0.00072	4.8162	0.1231	0.313212	0.007747	0.968	-4.3	-1.9	1824	11	1788	21	1756	38
14BD_58	14BD_58-05	326	108.9	0	2778	0.11268	0.00129	5.05125	0.10346	0.325117	0.005532	0.831	-1.8	.	1843	20	1828	17	1815	27
14BD_58	14BD_58-270	157	55.5	0	863	0.11453	0.00108	5.20747	0.07826	0.329764	0.003852	0.777	-2.2	.	1873	16	1854	13	1837	19
14BD_58	14BD_58-149	264	95.3	0	2226	0.11732	0.00219	5.4	0.18724	0.331113	0.009789	0.846	-4.3	.	1916	32	1878	30	1844	47
14BD_58	14BD_58-126	105	59.1	0	547	0.18701	0.00305	12.8718	0.5043	0.499193	0.01778	0.909	-4.7	.	2716	27	2670	37	2610	76
14BD_58	14BD_58-51	285	19.5	0	337	0.05568	0.00039	0.59517	0.00876	0.077531	0.001004	0.881	9.9	2	439	15	474	6	481	6
14BD_58	14BD_58-108	995	80.2	0	1836	0.05592	0.00051	0.60309	0.01325	0.078218	0.001566	0.911	8.4	.	449	19	479	8	485	9
14BD_58	14BD_58-160	741	61.6	0	1481	0.05632	0.0003	0.61872	0.01256	0.07968	0.00156	0.964	6.5	.	465	12	489	8	494	9
14BD_58	14BD_58-29	28	4.6	0	71	0.07435	0.00089	1.71369	0.03366	0.167166	0.002607	0.794	-5.6	.	1051	23	1014	13	996	14
14BD_58	14BD_58-36	22	3.6	0	64	0.07483	0.00096	1.75226	0.03691	0.169838	0.002842	0.794	-5.3	.	1064	25	1028	14	1011	16
14BD_58	14BD_58-20	42	6.7	0	139	0.07509	0.00081	1.7013	0.03067	0.164311	0.002373	0.801	-9.1	-4.2	1071	21	1009	12	981	13
14BD_58	14BD_58-42	11	1.8	0	20	0.07537	0.00108	1.77502	0.04313	0.170816	0.003358	0.809	-6.2	.	1078	29	1036	16	1017	18
14BD_58	14BD_58-172	108	19.2	0	587	0.07733	0.00046	1.84033	0.02298	0.172609	0.001896	0.88	-9.9	-7.1	1130	11	1060	8	1026	10
14BD_58	14BD_58-86	48	7.8	0	397	0.07752	0.00066	1.93627	0.03556	0.181155	0.00295	0.887	-5.9	-1.7	1135	17	1094	12	1073	16
14BD_58	14BD_58-12	154	28.9	0	649	0.07927	0.00078	2.05089	0.03495	0.187642	0.002606	0.815	-6.5	-2.1	1179	19	1133	12	1109	14
14BD_58	14BD_58-90	859	158.4	0	3779	0.08294	0.00063	2.3078	0.05065	0.201811	0.004156	0.938	-7.1	-3.6	1268	14	1215	16	1185	22
14BD_58	14BD_58-02	224	48	0	869	0.08495	0.00085	2.48018	0.04357	0.211742	0.003066	0.824	-6.4	-2.3	1314	19	1266	13	1238	16
14BD_58	14BD_58-229	87	18.1	0	427	0.08583	0.00053	2.52568	0.03829	0.21342	0.002959	0.915	-7.2	-4.5	1334	12	1279	11	1247	16
14BD_58	14BD_58-167	242	56.4	0	1464	0.08783	0.00053	2.62833	0.06199	0.217031	0.00495	0.967	-9	-6.4	1379	11	1309	17	1266	26
14BD_58	14BD_58-227	150	33.7	0	551	0.08898	0.00054	2.79668	0.04216	0.227948	0.003148	0.916	-6.3	-3.7	1404	11	1355	11	1324	17
14BD_58	14BD_58-185	58	13.6	0	521	0.08989	0.00055	2.82264	0.03803	0.227745	0.002739	0.893	-7.8	-5.3	1423	11	1362	10	1323	14
14BD_58	14BD_58-206	39	9.2	0	342	0.09066	0.00058	2.93786	0.04	0.235038	0.002832	0.885	-6	-3.5	1439	12	1392	10	1361	15
14BD_58	14BD_58-33	154	37.3	0	614	0.09324	0.00101	3.17674	0.05953	0.247113	0.003788	0.818	-5.2	-1.1	1493	20	1452	14	1424	20
14BD_58	14BD_58-194	190	49.5	0	1006	0.09555	0.00062	3.33316	0.04685	0.252989	0.00316	0.888	-6.2	-3.7	1539	12	1489	11	1454	16
14BD_58	14BD_58-177	69	19.8	0	836	0.1009	0.00063	3.77907	0.05458	0.271643	0.003543	0.903	-6.3	-3.9	1641	11	1588	12	1549	18
14BD_58	14BD_58-61	85	22.5	0	456	0.10453	0.00086	4.14352	0.08056	0.287496	0.005067	0.907	-5.1	-2	1706	15	1663	16	1629	25
14BD_58	14BD_58-230	123	36.2	0	1050	0.10689	0.0007	4.35575	0.06784	0.295545	0.004182	0.909	-5.1	-2.7	1747	12	1704	13	1669	21
14BD_58	14BD_58-252	69	22.8	0	450	0.11197	0.00104	4.77729	0.0693	0.309435	0.003446	0.768	-5.8	-2.9	1832	16	1781	12	1738	17
14BD_58	14BD_58-139	24	8.1	0	163	0.11581	0.00078	5	0.12845	0.312448	0.007767	0.966	-8.4	-6.1	1893	12	1818	22	1753	38
14BD_58	14BD_58-128	32	11.1	0	154	0.1182	0.00105	5.21373	0.13518	0.319914	0.007796	0.94	-8.3	-5.3	1929	15	1855	22	1789	38
14BD_58	14BD_58-241	194	89	0	2099	0.16423	0.00213	9.6867	0.18715	0.42778	0.006138	0.743	-9.7	-6.5	2500	22	2405	18	2296	28
14BD_58	14BD_58-95	84	40.7	0	1409	0.16563	0.00233	10.2798	0.34116	0.450124	0.013529	0.906	-5.6	-1.4	2514	23	2460	31	2396	60
14BD_58	14BD_58-117	65	32.6	0	798	0.17593	0.00274	10.9983	0.42666	0.453411	0.016107	0.916	-9.4	-5	2615	25	2523	36	2410	71
14BD_58	14BD_58-17	105	49.9	0	846	0.17601	0.00271	11.0994	0.28959	0.457368	0.009635	0.807	-8.6	-4.6	2616	25	2532	24	2428	43
14BD_58	14BD_58-48	209	94.3	0	1209	0.1835	0.0021	11.7834	0.31719	0.465732	0.01135	0.905	-9.8	-6.7	2685	18	2587	25	2465	50
14BD_58	14BD_58-132	133	74.1	0	1592	0.18888	0.00169	12.8221	0.4477	0.492348	0.016615	0.967	-6.7	-4.2	2732	14	2667	33	2581	72
14BD_58	14BD_58-255	21	11	0	302	0.18947	0.00246	12.651	0.24773	0.484272	0.007101	0.749	-8.5	-5.4	2738	20	2654	18	2546	31
14BD_58	14BD_58-249	102	55.7	0	1213	0.19247	0.00249	13.3	0.25961	0.501305	0.007332	0.75	-6.3	-3.2	2763	21	2701	18	2619	31
14BD_58	14BD_58-69	52	24.8	0	686	0.1979	0.00241	13.5512	0.3879	0.49663	0.012864	0.905	-9.1	-5.8	2809	19	2719	27	2599	55
14BD_58	14BD_58-237	209	115.5	0	2293	0.19824	0.00259	13.9099	0.27358	0.508888	0.007482	0.748	-6.9	-3.8	2812	21	2744	19	2652	32
14BD_58	14BD_58-214	63	33.9	0	1100	0.19835	0.00184	13.5772	0.29361	0.496454	0.009698	0.903	-9.2	-6.7	2813	15	2721	20	2599	42
14BD_58	14BD_58-120	37	20.8	0	403	0.19911	0.00335	13.808	0.53736	0.502964	0.017647	0.902	-8.3	-3.7	2819	27	2737	37	2627	76
14BD_58	14BD_58-04	91	47.8	0	959	0.19981	0.00338	13.743	0.3926	0.49885	0.011477	0.805	-9.3	-5.1	2825	28	2732	27	2609	49
14BD_58	14BD_58-162	116	67.4	0	2496	0.2031	0.00196	14.1705	0.53433	0.50602	0.018443	0.967	-9	-6.4	2851	15	2761	36	2640	79
14BD_58	14BD_58-75	115	56	0	2602	0.20472	0.0026	14.2929	0.41482	0.506367	0.013214	0.899	-9.5	-6.1	2864	20	2769	28	2641	57
14BD_58	14BD_58-24	54	29.3	0	616	0.21787	0.00402	15.8574	0.47486	0.527888	0.012455	0.788	-9.6	-5.2	2965	30	2868	29	2733	53
14BD_58	14BD_58-09	465	34.9	0	728	0.05497	0.00049	0.57452	0.00908	0.075799	0.000987	0.824	15.1	4.8	411	20	461	6	471	6
14BD_58	14BD_58-121	684	55.1	0	1028	0.05546	0.00053	0.59985	0.01248	0.078449	0.001451	0.889	13.5	2.3	431	21	477	8	487	9
14BD_58	14BD_58-32	118	8.2	0	134	0.05742	0.00062	0.6	0.01014	0.072879	0.001008	0.787	-11.1	-1	508	23	463	7	453	6
14BD_58	14BD_58-156	177	13.8	0	350	0.05831	0.00037	0.60682	0.01145	0.075482	0.001341	0.941	-13.8	-8.3	541	13	482	7	469	8
14BD_58	14BD_58-141	2322	181.9	0	2030	0.05865	0.0003	0.61043	0.0133	0.075481	0.001598	0.972	-15.9	-11.6	554	11	484	8	469	10
14BD_58	14BD_58-01	730	57.5	0	761	0.05905	0.00054	0.63925	0.01063	0.078515	0.001092	0.836	-14.9	-7.8	569	19	502	7	487	7
14BD_58	14BD_58-103	2098	168.7	0	1558	0.06023	0.00054	0.65255	0.01566	0.078582	0.00175	0.928	-21.1	-14.6	612	19	510	10	488	10
14BD_58	14BD_58-57	54	4.3	0	76	0.0604	0.00053	0.75117	0.0122	0.090194	0.001236	0.844	-10.4	-3.8	618	18	569	7	557	7
14BD_58	14BD_58-110	280	21.5	0	418	0.06039	0.00088	0.63085	0.01442	0.075766	0.00133	0.768	-24.6	-15.1	618	32	497	9	471	8
14BD_58	14BD_58-203	692	53.8	0	854	0.06211	0.00034	0.67881	0.00813	0.079271	0.000848	0.893	-28.5	-25.4	678	11	526	5	492	5
14BD_58	14BD_58-263	241	18.6	0	340	0.06258	0.00067	0.64626	0.00876	0.074894	0.000616	0.607	-34.1	-29	694	22	506	5	466	4
14BD_58	14BD_58-136	1498	118.6	0	861	0.06615	0.00049	0.68937	0.01516	0.07558	0.001566	0.942	-43.6	-40.7	811	15	532	9	470	9
14BD_58	14BD_58-93	803	70.2	0	1265	0.06817	0.00061	0.80594	0.02035	0.085743	0.002023	0.934	-40.9	-37.4	874	19	600	11	530	12
14BD_58	14BD_58-104	1009	96.3	0	853	0.07727	0.00075	0.99999	0.02197	0.093866	0.001852	0.898	-50.9	-48.4	1128	18	704	11	578	11
14BD_58	14BD_58-18	209	35.8	0	588	0.08013	0.00105	1.93325	0.03701	0.17498	0.002442	0.729	-14.5	-9.6	1200	25	1093	13	1039	13
14BD_58	14BD_58-62	54	3.8	0	66	0.08079	0.00611	0.88505	0.06843	0.079448	0.00126	0.205	-61.7	-42.5	1216	145	644	37	493	8
14BD_58	14BD_58-179	162	33	0	1183	0.08536	0.0006	2.4	0.03469	0.200061	0.00259	0.879	-12.2	-9.4	1324	13	1229	10	1176	14
14BD_58	14BD_58-23	227	46.7	0	824	0.08703	0.0009	2.50337	0.04694	0.20862	0.003262	0.834	-11.3	-7.3	1361	20	1273	14	1221	17
14BD_58	14BD_58-10	441	90	0	1389	0.08745	0.00089	2.43856	0.04359	0.202242	0.002979	0.824	-14.6	-10.9	1370	19	1254	13	1187	16
14BD_58	14BD_58-200	63	14.5	0	373	0.09157	0.00055	2.8829	0.0391	0.228333	0.002771	0.895	-10.1	-7.7	1459	11	1377	10	1326	15
14BD_58	14BD_58-39	1367	102.4	0	378	0.09255	0.00109	0.9969	0.0249	0.078125	0.001723	0.883	-69.7	-68.2	1479	22	702	13	485	10
14BD_58	14BD_58-146	146	37.7	0	1147	0.10829	0.00072	3.64983	0.08859	0.244452	0.005708	0.962	-22.7	-20.7	1771	12	1560	19	1410	30
14BD_58	14BD_58-67	258	58.1	0	1172	0.10943	0.00092	3.72556	0.0738	0.246929	0.004427	0.905	-22.8	-20.4	1790	15	1577	16	1423	23
14BD_58	14BD_58-157	282	82.5	0	1747	0.11109	0.00075	4.15903	0.10487	0.271533	0.0066	0.964	-16.6	-14.5	1817	11	1666	21	1549	33
14BD_58	14BD_58-84	298	73.1	0	297	0.14366	0.00175	5.32083	0.11669	0.268626	0.004894	0.831	-36.4	-34	2272	21	1872	19	1534	25
14BD_58	14BD_58-269	527	107.9	0	614	0.14542	0.00159	3.8824	0.0611	0.193628	0.002195	0.72	-54.7	-53.3	2293	18	1610	13	1141	12
14BD_58	14BD_58-49	393	146.7	0	1587	0.15739	0.00165	8.47317	0.20826	0.390443	0.008683	0.905	-14.6	-11.8	2428	17	2283	22	2125	40
14BD_58	14BD_58-242	508	159.8	0	1805	0.16806	0.00198	6.84065	0.14198	0.295212	0.005041	0.823	-38.8	-36.7	2538	19	2091	18	1668	25
14BD_58	14BD_58-247	366	116.6	0	1793	0.17138	0.00207	7.17209	0.12626	0.303522	0.003895	0.729	-38.1	-36.1	2571	19	2133	16	1709	19
14BD_58	14BD_58-153	332	161.8	0	7170	0.17402	0.00151	10.4473	0.3446	0.435422	0.013854	0.965	-12.2	-9.8	2597	14	2475	31	2330	62
14BD_58	14BD_58-245	97	44.1	0	1017	0.1768	0.00214	10.2997	0.18392	0.422522	0.005547	0.735	-15.9	-13.2	2623	20	2462	17	2272	25
14BD_58	14BD_58-59	33	14.3	0	300	0.18	0.00205	11.2953	0.30203	0.455115	0.011014	0.905	-10.6	-7.5	2653	19	2548	25	2418	49
14BD_58	14BD_58-150	138	68	0	1783	0.1847	0.00165	11.1276	0.36349	0.43695	0.013731	0.962	-15.8	-13.5	2696	14	2534	30	2337	62
14BD_58	14BD_58-264	22	2.3	0	34	0.18527	0.00937	2.57152	0.13683	0.100665	0.001673	0.312	-80.7	-78.7	2701	80	1293	39	618	10
14BD_58	14BD_58-138	267	136.4	0	1979	0.18549	0.00164	11.596	0.38119	0.453414	0.014352	0.963	-12.9	-10.6	2703	14	2572	31	2410	64
14BD_58	14BD_58-221	97	49	0	1519	0.18827	0.00166	12.2214	0.2517	0.47081	0.008762	0.904	-10.6	-8.2	2727	15	2622	19	2487	38
14BD_58	14BD_58-226	29	14.2	0	263	0.19413	0.00177	12.4866	0.27367	0.466485	0.009293	0.909	-13.4	-11	2778	14	2642	21	2468	41
14BD_58	14BD_58-243	214	114	0	2823	0.19782	0.0026	13.3918	0.2622	0.490994	0.00713	0.742	-10.1	-7.1	2808	21	2708	18	2575	31
14BD_58	14BD_58-208	238	91.1	0	1339	0.19798	0.00186	9.95043	0.21204	0.364517	0.006971	0.897	-33.3	-31.4	2810	15	2430	20	2004	33
14BD_58	14BD_58-228	68	34.5	0	586	0.19831	0.00182	13.0999	0.28701	0.479087	0.009526	0.908	-12.4	-10	2812	14	2687	21	2523	42
14BD_58	14BD_58-268	68	35.3	0	632	0.1987	0.00269	13.1252	0.26251	0.479074	0.00706	0.737	-12.5	-9.5	2816	21	2689	19	2523	31
14BD_58	14BD_58-223	67	35.1	0	990	0.19962	0.00184	13.457	0.28492	0.488921	0.009319	0.9	-11	-8.6	2823	14	2712	20	2566	40
14BD_58	14BD_58-43	158	14.9	0	56	0.20993	0.00627	2.88896	0.10374	0.099809	0.001987	0.554	-82.5	-81.4	2905	48	1379	27	613	12
14BD_58	14BD_58-28	95	49.6	0	826	0.21153	0.00381	14.9331	0.43762	0.512019	0.011839	0.789	-10.5	-6.3	2917	29	2811	28	2665	50
14BD_58	14BD_58-159	275	125.1	0	2739	0.21881	0.00226	12.2134	0.39302	0.404818	0.012338	0.947	-30.9	-28.8	2972	16	2621	30	2191	57
14BD_58	14BD_58-164	326	258.5	0	5990	0.33328	0.00491	29.9318	1.50646	0.651371	0.031348	0.956	-13.9	-10.5	3632	22	3485	49	3234	122
TGR_199	TGR_199_149	235	16.6	0	6792	0.05654	0.00025	0.60901	0.0042	0.078127	0.000419	0.777	2.5	.	473	9	483	3	485	3
TGR_199	TGR_199_179	336	24.1	0	6241	0.05681	0.00023	0.62806	0.00437	0.080187	0.000453	0.812	2.8	.	484	8	495	3	497	3
TGR_199	TGR_199_136	301	21.1	0	11027	0.05681	0.00021	0.6	0.00391	0.077505	0.000407	0.816	-0.6	.	484	8	482	2	481	2
TGR_199	TGR_199_171	509	37.4	0	8478	0.05686	0.00021	0.64003	0.00491	0.081633	0.000548	0.874	4.2	0.4	486	8	502	3	506	3
TGR_199	TGR_199_193	558	40.8	0	17059	0.05691	0.00022	0.63523	0.00651	0.080959	0.000768	0.926	3	.	488	8	499	4	502	5
TGR_199	TGR_199_168	290	21.3	0	8260	0.0572	0.00023	0.64284	0.00469	0.081505	0.000493	0.829	1.2	.	499	9	504	3	505	3
TGR_199	TGR_199_122	151	10.8	0	4178	0.0572	0.00028	0.62433	0.00513	0.079159	0.000519	0.797	-1.7	.	499	11	493	3	491	3
TGR_199	TGR_199_142	827	60.4	0	17476	0.05749	0.0002	0.63523	0.00684	0.080139	0.000816	0.945	-2.7	.	510	8	499	4	497	5
TGR_199	TGR_199_18_2	35	3.2	0	1002	0.05747	0.00074	0.62933	0.01016	0.079423	0.000769	0.6	-3.4	.	510	28	496	6	493	5
TGR_199	TGR_199_124	2583	187.5	0	19167	0.05748	0.00018	0.6	0.00714	0.079439	0.000867	0.962	-3.5	-0.4	510	7	496	4	493	5
TGR_199	TGR_199_164	812	59.1	0	11916	0.05753	0.0002	0.6318	0.00889	0.079644	0.001085	0.968	-3.7	-0.1	512	8	497	6	494	6
TGR_199	TGR_199_204	518	40.2	0	19459	0.05795	0.00023	0.69918	0.00849	0.087511	0.001007	0.948	2.6	.	528	8	538	5	541	6
TGR_199	TGR_199_156	193	29.9	0	13566	0.07173	0.00029	1.67799	0.01218	0.169659	0.001018	0.827	3.5	1.3	978	8	1000	5	1010	6
TGR_199	TGR_199_203	82	13	0	7251	0.0723	0.00033	1.73674	0.01508	0.17422	0.001289	0.852	4.5	1.9	994	9	1022	6	1035	7
TGR_199	TGR_199_137	554	90.4	0	34942	0.0727	0.00024	1.76963	0.01613	0.176551	0.0015	0.932	4.6	2.3	1005	6	1034	6	1048	8
TGR_199	TGR_199_111	111	15	0	7420	0.0728	0.0006	1.78373	0.03923	0.177702	0.003626	0.928	4.9	.	1008	16	1040	14	1054	20
TGR_199	TGR_199_99	45	6.2	0	4058	0.07319	0.00061	1.80125	0.03915	0.178482	0.003581	0.923	4.2	.	1019	16	1046	14	1059	20
TGR_199	TGR_199_196	136	21.8	0	9784	0.07377	0.0003	1.79774	0.01376	0.176735	0.00115	0.85	1.4	.	1035	8	1045	5	1049	6
TGR_199	TGR_199_131	122	19.6	0	10078	0.07382	0.00028	1.78363	0.01292	0.175248	0.001078	0.849	0.5	.	1036	8	1040	5	1041	6
TGR_199	TGR_199_145	297	47.1	0	16461	0.07402	0.00025	1.76902	0.01276	0.173341	0.001099	0.879	-1.2	.	1042	7	1034	5	1030	6
TGR_199	TGR_199_181	144	22.6	0	11222	0.07425	0.0003	1.76366	0.01427	0.172282	0.001215	0.871	-2.4	-0.3	1048	8	1032	5	1025	7
TGR_199	TGR_199_38	106	21.9	0	6894	0.07486	0.00088	1.8	0.02658	0.177474	0.001496	0.581	-1.2	.	1065	23	1057	10	1053	8
TGR_199	TGR_199_147	105	17	0	18901	0.07504	0.0003	1.83079	0.01509	0.176941	0.001278	0.876	-2	.	1070	8	1057	5	1050	7
TGR_199	TGR_199_134	65	10.8	0	15677	0.07513	0.00032	1.87398	0.01446	0.180916	0.001168	0.837	0	.	1072	8	1072	5	1072	6
TGR_199	TGR_199_11	52	11.2	0	4698	0.07537	0.00089	1.8963	0.03072	0.182481	0.002021	0.684	0.2	.	1078	22	1080	11	1081	11
TGR_199	TGR_199_73	42	6.1	0	3174	0.07566	0.00059	1.96898	0.04191	0.188748	0.003741	0.931	2.9	.	1086	15	1105	14	1115	20
TGR_199	TGR_199_123	93	16.3	0	8326	0.07756	0.0003	2.02518	0.01462	0.189371	0.001151	0.842	-1.7	.	1136	7	1124	5	1118	6
TGR_199	TGR_199_34	120	27.2	0	39588	0.07778	0.00092	2.0923	0.03073	0.1951	0.001698	0.593	0.7	.	1141	22	1146	10	1149	9
TGR_199	TGR_199_180	96	18	0	11375	0.07833	0.00033	2.20728	0.01701	0.204388	0.001315	0.835	4.1	2	1155	8	1183	5	1199	7
TGR_199	TGR_199_155	75	13.5	0	13583	0.07876	0.00033	2.1251	0.01571	0.195686	0.00119	0.823	-1.3	.	1166	8	1157	5	1152	6
TGR_199	TGR_199_46	189	43.5	0	24403	0.07903	0.00094	2.15862	0.03203	0.198092	0.001744	0.593	-0.7	.	1173	22	1168	10	1165	9
TGR_199	TGR_199_115	248	46.3	0	22274	0.0793	0.00029	2.20404	0.01607	0.201571	0.001275	0.868	0.4	.	1180	7	1182	5	1184	7
TGR_199	TGR_199_174	377	73.4	0	46055	0.08202	0.00031	2.39358	0.02046	0.211643	0.001627	0.9	-0.8	.	1246	7	1241	6	1238	9
TGR_199	TGR_199_25	179	45.4	0	5958	0.08493	0.00105	2.52697	0.04391	0.215784	0.002636	0.703	-4.6	.	1314	23	1280	13	1260	14
TGR_199	TGR_199_125	330	68.3	0	40773	0.0852	0.0003	2.62052	0.02395	0.223085	0.001882	0.923	-1.8	-0.2	1320	7	1306	7	1298	10
TGR_199	TGR_199_166	125	25.5	0	9932	0.08573	0.00034	2.62608	0.02031	0.222161	0.00147	0.855	-3.2	-1.5	1332	7	1308	6	1293	8
TGR_199	TGR_199_95	137	25.1	0	71587	0.08591	0.00074	2.78608	0.06564	0.235209	0.005157	0.931	2.1	.	1336	17	1352	18	1362	27
TGR_199	TGR_199_160	245	50.6	0	19838	0.08631	0.00032	2.66149	0.02222	0.223659	0.001671	0.895	-3.6	-2	1345	7	1318	6	1301	9
TGR_199	TGR_199_36	412	113.5	0	35479	0.0871	0.00106	2.8154	0.04193	0.234437	0.002026	0.58	-0.4	.	1363	23	1360	11	1358	11
TGR_199	TGR_199_133	225	49.9	0	19721	0.08813	0.00032	2.89979	0.02265	0.238636	0.001648	0.884	-0.5	.	1385	7	1382	6	1380	9
TGR_199	TGR_199_116	303	55.9	0	27632	0.08972	0.00081	2.93841	0.07309	0.237543	0.005508	0.932	-3.6	.	1419	17	1392	19	1374	29
TGR_199	TGR_199_197	112	25.3	0	10276	0.09004	0.00044	3.04321	0.03131	0.245128	0.002225	0.882	-1	.	1426	9	1419	8	1413	12
TGR_199	TGR_199_53	162	42.6	0	9460	0.09011	0.00199	3.13069	0.12429	0.251992	0.008314	0.831	1.6	.	1428	41	1440	31	1449	43
TGR_199	TGR_199_191	89	22.4	0	27804	0.09311	0.00039	3.49301	0.02985	0.272072	0.002018	0.868	4.6	2.6	1490	8	1526	7	1551	10
TGR_199	TGR_199_141	200	48.8	0	27461	0.09516	0.00036	3.44192	0.02713	0.262315	0.00181	0.875	-2.2	-0.6	1531	7	1514	6	1502	9
TGR_199	TGR_199_56	365	108.8	0	21043	0.09814	0.00229	3.91632	0.16677	0.28941	0.010301	0.836	3.5	.	1589	44	1617	34	1639	52
TGR_199	TGR_199_57	111	32.4	0	14800	0.09885	0.00233	3.88342	0.1644	0.284923	0.010021	0.831	1	.	1603	44	1610	34	1616	50
TGR_199	TGR_199_80	83	18.4	0	9198	0.09947	0.00087	3.8624	0.09493	0.281624	0.006464	0.934	-1	.	1614	16	1606	20	1600	33
TGR_199	TGR_199_148	88	23	0	11538	0.09987	0.00043	3.85641	0.03051	0.280063	0.001865	0.842	-2.1	-0.5	1622	8	1605	6	1592	9
TGR_199	TGR_199_167	70	18.4	0	8909	0.09992	0.00044	3.86657	0.03299	0.280654	0.002056	0.859	-1.9	-0.3	1623	8	1607	7	1595	10
TGR_199	TGR_199_71	556	155.7	0	51123	0.10045	0.00244	4.01141	0.16844	0.289642	0.009919	0.816	0.5	.	1632	43	1637	34	1640	50
TGR_199	TGR_199_132	149	39.6	0	18920	0.10054	0.00039	3.9255	0.03383	0.283182	0.002184	0.895	-1.8	-0.3	1634	7	1619	7	1607	11
TGR_199	TGR_199_41	71	23.2	0	16683	0.10059	0.00132	3.84641	0.06771	0.27733	0.003239	0.663	-3.9	.	1635	23	1603	14	1578	16
TGR_199	TGR_199_173	192	51.4	0	29787	0.1009	0.0004	4.01276	0.0321	0.288439	0.002011	0.871	-0.5	.	1641	7	1637	7	1634	10
TGR_199	TGR_199_153	120	32	0	81503	0.10158	0.00042	4.01077	0.03171	0.286367	0.001934	0.854	-2	-0.5	1653	7	1636	6	1623	10
TGR_199	TGR_199_33	320	113.1	0	27650	0.10283	0.00133	4.22746	0.07155	0.298158	0.00324	0.642	0.4	.	1676	24	1679	14	1682	16
TGR_199	TGR_199_143	136	37.7	0	26322	0.10355	0.00041	4.21563	0.03412	0.295269	0.002082	0.871	-1.4	.	1689	7	1677	7	1668	10
TGR_199	TGR_199_109	44	10.4	0	6296	0.1064	0.00101	4.42748	0.11724	0.301799	0.007457	0.933	-2.5	.	1739	17	1717	22	1700	37
TGR_199	TGR_199_26	131	47.6	0	16288	0.10837	0.00146	4.52682	0.07521	0.302962	0.00293	0.582	-4.3	-0.6	1772	24	1736	14	1706	14
TGR_199	TGR_199_49	51	18.1	0	6872	0.10844	0.0015	4.51328	0.07872	0.301856	0.003213	0.61	-4.7	-0.9	1773	23	1733	14	1701	16
TGR_199	TGR_199_187	48	14.6	0	5080	0.11557	0.00053	5.22888	0.04863	0.328133	0.002662	0.872	-3.6	-2	1889	8	1857	8	1829	13
TGR_199	TGR_199_58	113	60.3	0	141467	0.18378	0.00699	12.6539	0.87912	0.499379	0.029027	0.837	-3.4	.	2687	63	2654	65	2611	125
TGR_199	TGR_199_59	191	104.1	0	24667	0.18553	0.00711	13.1098	0.91886	0.512474	0.03007	0.837	-1.6	.	2703	64	2688	66	2667	128
TGR_199	TGR_199_103	83	34.9	0	19378	0.186	0.00247	13.273	0.50384	0.517559	0.018405	0.937	-0.8	.	2707	22	2699	36	2689	78
TGR_199	TGR_199_108	86	35.7	0	37178	0.19041	0.00258	13.3164	0.49969	0.507212	0.017752	0.933	-4.5	-0.5	2746	22	2702	35	2645	76
TGR_199	TGR_199_112	500	30.4	0	15963	0.05632	0.00044	0.62826	0.01317	0.080902	0.001577	0.93	8.1	.	465	16	495	8	502	9
TGR_199	TGR_199_47	606	54.2	0	17299	0.0577	0.00064	0.62404	0.00902	0.078436	0.000726	0.641	-6.4	.	519	23	492	6	487	4
TGR_199	TGR_199_40	1017	90.8	0	11586	0.05804	0.00064	0.62267	0.00983	0.077814	0.000883	0.719	-9.4	.	531	23	492	6	483	5
TGR_199	TGR_199_201	129	9.2	0	4061	0.05819	0.00033	0.63869	0.00546	0.079602	0.000508	0.746	-8.4	-3.6	537	12	501	3	494	3
TGR_199	TGR_199_117	373	27.8	0	16260	0.05823	0.00023	0.66129	0.00472	0.08236	0.000488	0.831	-5.5	-2	539	9	515	3	510	3
TGR_199	TGR_199_140	728	52.9	0	30987	0.05829	0.00022	0.63827	0.00777	0.079413	0.000921	0.952	-9.3	-5.9	541	8	501	5	493	5
TGR_199	TGR_199_22	1742	161.5	0	16166	0.05841	0.00061	0.64326	0.01061	0.079868	0.001016	0.771	-9.5	-0.5	545	22	504	7	495	6
TGR_199	TGR_199_27	1890	178.4	0	9199	0.05846	0.00063	0.66459	0.01076	0.082457	0.000999	0.748	-6.9	.	547	23	517	7	511	6
TGR_199	TGR_199_67	97	16.2	0	13588	0.07047	0.00143	1.6647	0.05588	0.171339	0.004575	0.796	8.9	.	942	40	995	21	1019	25
TGR_199	TGR_199_64	79	14.4	0	2790	0.0726	0.00148	1.8406	0.06276	0.183878	0.005033	0.803	9.3	.	1003	39	1060	22	1088	27
TGR_199	TGR_199_113	259	35.2	0	19677	0.073	0.0006	1.80646	0.04022	0.179483	0.003717	0.93	5.4	.	1014	16	1048	15	1064	20
TGR_199	TGR_199_175	73	12.2	0	4727	0.07303	0.00034	1.831	0.01878	0.18184	0.001659	0.889	6.7	3.8	1015	9	1057	7	1077	9
TGR_199	TGR_199_62	403	84.2	0	17725	0.07718	0.00158	2.22421	0.07896	0.209008	0.006055	0.816	9.5	.	1126	39	1189	25	1224	32
TGR_199	TGR_199_114	681	108.3	0	55188	0.07725	0.00064	2.1962	0.05353	0.206196	0.004728	0.941	7.9	1.9	1128	16	1180	17	1209	25
TGR_199	TGR_199_86	134	22	0	18684	0.079	0.00064	2.3	0.0524	0.2116	0.004499	0.935	6.1	0.6	1172	15	1214	16	1237	24
TGR_199	TGR_199_107	96	15.7	0	9509	0.07937	0.00067	2.33921	0.05412	0.213758	0.004602	0.931	6.3	0.7	1181	17	1224	16	1249	24
TGR_199	TGR_199_72	539	120.2	0	38130	0.08208	0.00179	2.61273	0.0978	0.230871	0.007021	0.812	8.1	.	1247	41	1304	27	1339	37
TGR_199	TGR_199_74	218	47.4	0	10697	0.08247	0.00181	2.6	0.09855	0.228647	0.007072	0.816	6.2	.	1257	40	1301	28	1327	37
TGR_199	TGR_199_102	197	36.1	0	15603	0.08407	0.0007	2.737	0.06525	0.236116	0.005274	0.937	6.2	0.6	1294	16	1339	18	1366	28
TGR_199	TGR_199_85	324	61.3	0	70637	0.08506	0.00069	2.84677	0.06698	0.242732	0.00536	0.939	7.1	1.6	1317	16	1368	18	1401	28
TGR_199	TGR_199_70	315	76.9	0	17569	0.08557	0.00189	2.96182	0.11367	0.251023	0.007886	0.819	9.7	.	1329	41	1398	29	1444	41
TGR_199	TGR_199_29	161	40.9	0	8001	0.08602	0.0011	2.6	0.04351	0.216868	0.002412	0.658	-6	-1.5	1339	23	1293	12	1265	13
TGR_199	TGR_199_98	149	29.9	0	17423	0.08823	0.00074	3.13651	0.07476	0.257819	0.005751	0.936	7.4	1.8	1388	16	1442	18	1479	29
TGR_199	TGR_199_151	791	170.7	0	5468	0.08906	0.00034	2.82951	0.03359	0.230426	0.002592	0.948	-5.4	-3.8	1405	7	1363	9	1337	14
TGR_199	TGR_199_28	10	2.7	0	19095	0.08921	0.00129	2.84426	0.06058	0.231238	0.003618	0.735	-5.3	-0.1	1409	28	1367	16	1341	19
TGR_199	TGR_199_118	46	9.8	0	5072	0.08948	0.00044	2.84857	0.02711	0.230898	0.001886	0.858	-5.9	-3.9	1414	9	1368	7	1339	10
TGR_199	TGR_199_184	593	128.5	0	13286	0.0904	0.00035	2.9298	0.02562	0.235066	0.001842	0.896	-5.6	-4	1434	7	1390	7	1361	10
TGR_199	TGR_199_121	138	32.2	0	7611	0.09455	0.00037	3.26357	0.02612	0.250342	0.001751	0.874	-5.8	-4.3	1519	7	1472	6	1440	9
TGR_199	TGR_199_87	478	107.1	0	3591	0.10369	0.00098	4.0478	0.10501	0.283122	0.006838	0.931	-5.6	-2	1691	17	1644	21	1607	34
TGR_199	TGR_199_60	239	87.5	0	19520	0.11189	0.00286	5.50241	0.26639	0.356679	0.014671	0.85	8.6	.	1830	46	1901	42	1966	70
TGR_199	TGR_199_43	190	68.2	0	22552	0.11344	0.00155	4.73963	0.08144	0.303029	0.003158	0.606	-9.1	-5.7	1855	24	1774	14	1706	16
TGR_199	TGR_199_77	19	6.9	0	6613	0.16209	0.00193	9.73789	0.32287	0.43573	0.013479	0.933	-7	-3.4	2478	20	2410	31	2331	61
TGR_199	TGR_199_106	53	20.3	0	11058	0.18328	0.00242	11.9474	0.42474	0.472775	0.015609	0.929	-8.4	-4.7	2683	21	2600	33	2496	68
TGR_199	TGR_199_120	162	77.8	0	42293	0.19226	0.00105	13.1019	0.14376	0.494241	0.004698	0.866	-7.6	-6.1	2762	9	2687	10	2589	20
TGR_199	TGR_199_35	83	51.7	0	30040	0.19424	0.00371	13.4579	0.31406	0.502514	0.006746	0.575	-6.7	-3.1	2778	31	2712	22	2625	29
TGR_199	TGR_199_82	66	27.7	0	23363	0.19696	0.00271	13.7717	0.52045	0.507114	0.01785	0.931	-6.8	-2.9	2801	22	2734	36	2644	76
TGR_199	TGR_199_195	41	20.5	0	7905	0.19895	0.00121	14.1235	0.18118	0.514876	0.005817	0.881	-6.1	-4.4	2818	10	2758	12	2677	25
TGR_199	TGR_199_48	147	91.6	0	33466	0.19976	0.00383	13.9582	0.33001	0.506776	0.007026	0.586	-7.8	-4.2	2824	30	2747	22	2643	30
TGR_199	TGR_199_200	51	25.1	0	9363	0.20393	0.00125	14.43	0.17896	0.513207	0.005538	0.87	-8	-6.4	2858	10	2778	12	2670	24
TGR_199	TGR_199_89	69	31.8	0	14860	0.22168	0.00337	16.8672	0.69327	0.551835	0.021073	0.929	-6.6	-2.4	2993	24	2927	39	2833	88
TGR_199	TGR_199_199	284	20.9	0	13636	0.05607	0.00024	0.63517	0.00503	0.082166	0.000544	0.836	12.4	7.7	455	9	499	3	509	3
TGR_199	TGR_199_100	324	19.1	0	1984	0.05964	0.00047	0.6	0.01253	0.078515	0.001391	0.913	-18.1	-12.1	590	16	506	8	487	8
TGR_199	TGR_199_190	162	12	0	3304	0.06134	0.0005	0.69522	0.00699	0.082201	0.000491	0.595	-22.7	-17.8	651	17	536	4	509	3
TGR_199	TGR_199_97	172	10.7	0	3311	0.06193	0.00051	0.70354	0.01386	0.08239	0.001474	0.908	-25	-19.9	672	18	541	8	510	9
TGR_199	TGR_199_139	525	40.7	0	2856	0.06231	0.00044	0.73214	0.01044	0.085223	0.001055	0.868	-23.9	-19.8	685	14	558	6	527	6
TGR_199	TGR_199_159	465	36.1	0	1817	0.06543	0.00045	0.77568	0.00954	0.085987	0.000875	0.828	-33.9	-30.9	788	14	583	5	532	5
TGR_199	TGR_199_65	441	86.3	0	36769	0.07246	0.00146	1.98552	0.0689	0.198743	0.005623	0.815	18.6	6.9	999	39	1111	23	1169	30
TGR_199	TGR_199_31	194	42.2	0	14230	0.08127	0.00098	2.08554	0.03242	0.186107	0.001836	0.635	-11.3	-7	1228	22	1144	11	1100	10
TGR_199	TGR_199_185	425	63.1	0	9240	0.08323	0.00033	1.87084	0.01578	0.163019	0.001211	0.88	-25.4	-24	1275	8	1071	6	974	7
TGR_199	TGR_199_194	278	51.6	0	1036	0.09119	0.00113	2.54853	0.03788	0.202693	0.001669	0.554	-19.7	-16.4	1451	23	1286	11	1190	9
TGR_199	TGR_199_76	283	55.1	0	33674	0.09701	0.00081	3.30797	0.08301	0.247318	0.005857	0.944	-10.1	-7	1567	16	1483	20	1425	30
TGR_199	TGR_199_158	28	5.3	0	1651	0.09968	0.00126	2.87724	0.06466	0.209358	0.003887	0.826	-26.6	-23.1	1618	23	1376	17	1225	21
TGR_199	TGR_199_45	288	92.3	0	68164	0.10734	0.00142	4.01197	0.07371	0.271072	0.003443	0.691	-13.4	-9.8	1755	23	1637	15	1546	17
TGR_199	TGR_199_66	422	100.5	0	12537	0.11229	0.0029	3.74775	0.15186	0.242064	0.007553	0.77	-26.6	-20.1	1837	45	1582	32	1397	39
TGR_199	TGR_199_39	608	107.6	0	2664	0.12403	0.00253	2.66045	0.09308	0.155565	0.004418	0.812	-57.6	-54.7	2015	35	1318	26	932	25
TGR_199	TGR_199_188	59	18.3	0	8219	0.12459	0.0008	5.67134	0.05866	0.330151	0.002682	0.786	-10.4	-8.6	2023	11	1927	9	1839	13
TGR_199	TGR_199_189	129	41.5	0	21576	0.13021	0.0006	6.18733	0.06117	0.344645	0.003021	0.887	-10.5	-9.1	2101	8	2003	9	1909	14
TGR_199	TGR_199_24	839	157	0	3933	0.14654	0.00253	3.2541	0.08584	0.161054	0.003214	0.756	-62.5	-60.7	2306	29	1470	20	963	18
TGR_199	TGR_199_169	133	50.6	0	31118	0.15302	0.00089	8.46597	0.089	0.401271	0.003507	0.831	-10.1	-8.6	2380	10	2282	10	2175	16
TGR_199	TGR_199_104	68	22.2	0	18582	0.15749	0.00186	8.93074	0.28609	0.411284	0.012244	0.929	-10.1	-6.7	2429	20	2331	29	2221	56
TGR_199	TGR_199_130	45	17.3	0	12168	0.15892	0.00082	8.79431	0.09116	0.401347	0.003603	0.866	-13	-11.6	2444	9	2317	9	2175	17
TGR_199	TGR_199_81	151	54.3	0	15338	0.1784	0.00227	10.8831	0.36685	0.442444	0.013814	0.926	-12.5	-9	2638	21	2513	31	2362	62
TGR_199	TGR_199_128	100	44.6	0	18246	0.19159	0.00107	12.243	0.16638	0.463469	0.005738	0.911	-13.1	-11.7	2756	9	2623	13	2455	25
TGR_199	TGR_199_93	194	62.8	0	5319	0.20221	0.00286	11.1682	0.36639	0.400571	0.011855	0.902	-27.8	-24.7	2844	23	2537	31	2172	55
TGR_199	TGR_199_172	110	49.3	0	11779	0.21099	0.00128	13.5407	0.14958	0.465456	0.004304	0.837	-18.5	-17.2	2913	9	2718	10	2464	19
TGR_199	TGR_199_30	123	80	0	23981	0.26475	0.00668	19.1514	0.57698	0.524644	0.008627	0.546	-20.8	-17.1	3275	40	3049	29	2719	36
TGR_201	TGR_201_10	280	22.3	0	9259	0.05633	0.00051	0.60997	0.00821	0.078536	0.000777	0.735	4.9	.	465	21	484	5	487	5
TGR_201	TGR_201_58	148	11.4	0	4905	0.05658	0.0003	0.62508	0.0086	0.080131	0.001017	0.923	4.8	.	475	12	493	5	497	6
TGR_201	TGR_201_28	293	23	0	12654	0.05667	0.00052	0.61762	0.00852	0.079037	0.000812	0.744	2.5	.	479	20	488	5	490	5
TGR_201	TGR_201_20	451	36.4	0	14593	0.05688	0.00051	0.63139	0.00916	0.080509	0.000922	0.789	2.6	.	487	19	497	6	499	5
TGR_201	TGR_201_4	687	56.7	0	11995	0.05706	0.0005	0.63886	0.00882	0.081197	0.000866	0.772	1.9	.	494	20	502	5	503	5
TGR_201	TGR_201_105	300	20.5	0	7503	0.05713	0.00021	0.644	0.00729	0.081761	0.000876	0.946	2.1	.	496	8	505	5	507	5
TGR_201	TGR_201_83	439	34.4	0	10053	0.0575	0.00031	0.64505	0.00886	0.081356	0.001026	0.918	-1.4	.	511	12	505	5	504	6
TGR_201	TGR_201_79	201	32.1	0	18252	0.07008	0.00033	1.55587	0.02198	0.161025	0.002145	0.943	3.7	0.1	931	9	953	9	962	12
TGR_201	TGR_201_52	565	91.9	0	38477	0.07052	0.0003	1.55246	0.02192	0.159672	0.002151	0.954	1.3	.	943	8	951	9	955	12
TGR_201	TGR_201_64	46	7.7	0	3471	0.07135	0.00043	1.6223	0.02317	0.164916	0.002132	0.905	1.9	.	967	12	979	9	984	12
TGR_201	TGR_201_48	361	64.7	0	21044	0.07278	0.00031	1.76983	0.02387	0.176364	0.002258	0.949	4.2	0.9	1008	8	1034	9	1047	12
TGR_201	TGR_201_24	101	17.9	0	10009	0.07292	0.00069	1.73868	0.02596	0.172941	0.001999	0.774	1.8	.	1012	19	1023	10	1028	11
TGR_201	TGR_201_100	163	24.1	0	10792	0.0732	0.00025	1.72892	0.02322	0.171292	0.002223	0.966	0	.	1020	7	1019	9	1019	12
TGR_201	TGR_201_102	790	121	0	36794	0.07324	0.00024	1.79976	0.0229	0.178224	0.002191	0.966	3.9	0.8	1021	6	1045	8	1057	12
TGR_201	TGR_201_36	215	38.7	0	13743	0.07368	0.00035	1.7903	0.02353	0.176223	0.002162	0.934	1.4	.	1033	10	1042	9	1046	12
TGR_201	TGR_201_109	188	28.6	0	9134	0.07419	0.00026	1.80247	0.02361	0.1762	0.002224	0.964	-0.1	.	1047	7	1046	9	1046	12
TGR_201	TGR_201_29	67	12.2	0	454541	0.07452	0.00074	1.87075	0.02882	0.182079	0.002143	0.764	2.3	.	1055	20	1071	10	1078	12
TGR_201	TGR_201_108	84	13	0	6985	0.07543	0.00032	1.86454	0.02357	0.179278	0.002138	0.944	-1.7	.	1080	8	1069	8	1063	12
TGR_201	TGR_201_107	73	11.3	0	5195	0.07546	0.00031	1.9	0.02381	0.180457	0.002164	0.945	-1.1	.	1081	8	1073	8	1069	12
TGR_201	TGR_201_116	311	59	0	24446	0.07752	0.00027	2.06277	0.03995	0.192983	0.003676	0.984	0.3	.	1135	7	1137	13	1138	20
TGR_201	TGR_201_40	39	7.7	0	5094	0.07764	0.00082	2.08728	0.03366	0.194977	0.002375	0.755	1	.	1138	21	1145	11	1148	13
TGR_201	TGR_201_38	36	7	0	2609	0.07898	0.00085	2.09776	0.04017	0.192631	0.003046	0.826	-3.4	.	1172	21	1148	13	1136	16
TGR_201	TGR_201_31	57	11.8	0	4598	0.08049	0.00081	2.28291	0.03478	0.205696	0.002348	0.749	-0.3	.	1209	19	1207	11	1206	13
TGR_201	TGR_201_19	38	8.1	0	4215	0.08176	0.00086	2.35445	0.03729	0.208858	0.002479	0.749	-1.5	.	1240	20	1229	11	1223	13
TGR_201	TGR_201_35	339	75.2	0	25645	0.08188	0.00036	2.41535	0.03321	0.213941	0.002785	0.947	0.6	.	1243	8	1247	10	1250	15
TGR_201	TGR_201_90	1340	246.3	0	4735	0.0825	0.00031	2.34618	0.03483	0.206255	0.002962	0.968	-4.2	-2.5	1257	7	1226	11	1209	16
TGR_201	TGR_201_121	1003	228.3	0	99103	0.08418	0.0003	2.70665	0.05706	0.233208	0.004846	0.986	4.7	.	1297	7	1330	16	1351	25
TGR_201	TGR_201_49	181	41.8	0	19017	0.08508	0.0004	2.62252	0.03778	0.223549	0.003045	0.946	-1.4	.	1317	9	1307	11	1301	16
TGR_201	TGR_201_70	556	134.8	0	54728	0.08525	0.00038	2.7862	0.04177	0.237042	0.003394	0.955	4.2	0.7	1321	8	1352	11	1371	18
TGR_201	TGR_201_22	30	6.8	0	4451	0.08658	0.00093	2.65854	0.04391	0.222695	0.002786	0.757	-4.5	-0.4	1351	20	1317	12	1296	15
TGR_201	TGR_201_85	19	4.5	0	2004	0.08678	0.00058	2.71913	0.04534	0.227255	0.003467	0.915	-2.9	.	1356	12	1334	12	1320	18
TGR_201	TGR_201_33	416	101	0	38698	0.08683	0.00038	2.78917	0.03893	0.232983	0.003084	0.948	-0.5	.	1357	8	1353	10	1350	16
TGR_201	TGR_201_39	137	34.5	0	4788	0.09087	0.00096	3.10832	0.05279	0.248091	0.003295	0.782	-1.2	.	1444	19	1435	13	1429	17
TGR_201	TGR_201_25	211	56.4	0	32429	0.09111	0.00094	3.3	0.05319	0.261877	0.003267	0.772	3.9	.	1449	19	1479	13	1499	17
TGR_201	TGR_201_98	246	53.9	0	20782	0.09168	0.00029	3.1	0.04307	0.245607	0.003316	0.973	-3.4	-2.1	1461	6	1434	11	1416	17
TGR_201	TGR_201_67	246	74.2	0	29381	0.09991	0.00048	3.98361	0.06501	0.289175	0.004507	0.955	1	.	1622	9	1631	13	1637	23
TGR_201	TGR_201_123	337	95.8	0	41539	0.10081	0.00038	4	0.09076	0.288395	0.006437	0.986	-0.4	.	1639	7	1636	18	1634	32
TGR_201	TGR_201_86	290	85.7	0	96739	0.10102	0.0005	4.00756	0.06766	0.287731	0.004642	0.956	-0.9	.	1643	9	1636	14	1630	23
TGR_201	TGR_201_27	42	12.6	0	5973	0.10312	0.00115	4.19205	0.07269	0.294834	0.003924	0.767	-1	.	1681	20	1672	14	1666	20
TGR_201	TGR_201_95	78	20.2	0	9288	0.10386	0.0004	4.10966	0.0628	0.286981	0.004241	0.967	-4.5	-3	1694	7	1656	12	1626	21
TGR_201	TGR_201_30	111	35	0	15884	0.10569	0.00116	4.46611	0.07742	0.306482	0.004114	0.774	-0.2	.	1726	19	1725	14	1723	20
TGR_201	TGR_201_72	205	68.1	0	29825	0.11019	0.00056	4.80347	0.08354	0.316163	0.00526	0.957	-2	-0.1	1803	9	1786	15	1771	26
TGR_201	TGR_201_75	207	69.4	0	35811	0.11334	0.00059	5.0001	0.08811	0.31997	0.005387	0.955	-4	-2	1854	9	1819	15	1790	26
TGR_201	TGR_201_63	282	97.9	0	43615	0.11469	0.00059	5.1744	0.08955	0.327213	0.005411	0.956	-3.1	-1.2	1875	9	1848	15	1825	26
TGR_201	TGR_201_77	389	139.5	0	91992	0.11564	0.00062	5.4337	0.09858	0.340796	0.005909	0.956	0	.	1890	9	1890	16	1890	28
TGR_201	TGR_201_34	198	71.7	0	32001	0.11716	0.0006	5.40649	0.09062	0.33468	0.005341	0.952	-3.1	-1.3	1913	9	1886	14	1861	26
TGR_201	TGR_201_89	232	17.8	0	12031	0.05584	0.00027	0.6042	0.00755	0.078474	0.000904	0.922	9.5	3.7	446	11	480	5	487	5
TGR_201	TGR_201_118	309	22.7	0	7976	0.05589	0.00022	0.58458	0.01045	0.075859	0.001324	0.976	5.4	.	448	8	467	7	471	8
TGR_201	TGR_201_50	803	64.6	0	25248	0.05621	0.00023	0.6	0.00794	0.081164	0.000968	0.945	9.6	4.5	461	9	495	5	503	6
TGR_201	TGR_201_51	495	38.7	0	20984	0.05637	0.00024	0.6161	0.00763	0.079271	0.000922	0.94	5.5	0.7	467	9	487	5	492	6
TGR_201	TGR_201_78	939	75.5	0	48000	0.05645	0.00024	0.64148	0.00981	0.082411	0.001213	0.962	8.9	3.5	470	9	503	6	510	7
TGR_201	TGR_201_74	662	51.9	0	20478	0.05656	0.00025	0.63005	0.0082	0.080786	0.00099	0.942	5.7	0.7	475	9	496	5	501	6
TGR_201	TGR_201_65	1051	84.9	0	8347	0.05821	0.00025	0.65987	0.00865	0.082222	0.00102	0.946	-5.5	-1.4	538	9	515	5	509	6
TGR_201	TGR_201_97	2030	142.4	0	12116	0.05847	0.00021	0.66604	0.00793	0.08262	0.000938	0.953	-6.8	-3.4	547	8	518	5	512	6
TGR_201	TGR_201_41	1182	99.7	0	11485	0.05853	0.00025	0.68214	0.00852	0.084534	0.000991	0.938	-5	-1	550	9	528	5	523	6
TGR_201	TGR_201_54	440	85.1	0	39290	0.07473	0.00031	1.95115	0.02627	0.189368	0.002422	0.95	5.8	2.6	1061	8	1099	9	1118	13
TGR_201	TGR_201_124	103	16.6	0	5374	0.07506	0.00033	1.73603	0.0388	0.167738	0.003673	0.98	-7.1	-4.8	1070	9	1022	14	1000	20
TGR_201	TGR_201_88	237	43.4	0	14860	0.08299	0.00027	2.36334	0.03327	0.206542	0.002831	0.974	-5.1	-3.6	1269	6	1232	10	1210	15
TGR_201	TGR_201_11	152	37.5	0	14898	0.09145	0.00094	2.97873	0.05198	0.236235	0.003339	0.81	-6.8	-2.9	1456	19	1402	13	1367	17
TGR_201	TGR_201_23	207	48.9	0	30489	0.09168	0.00093	2.90179	0.04644	0.229551	0.002845	0.774	-9.7	-6.2	1461	19	1382	12	1332	15
TGR_201	TGR_201_126	1100	314.5	0	119166	0.09721	0.00038	3.89465	0.08855	0.290568	0.006507	0.985	5.3	.	1571	7	1613	18	1644	33
TGR_201	TGR_201_103	508	129.3	0	52407	0.10753	0.00041	4.22851	0.06285	0.285217	0.004099	0.967	-9	-7.7	1758	7	1680	12	1618	21
TGR_201	TGR_201_82	49	15.5	0	7086	0.11059	0.00061	4.67426	0.0827	0.30655	0.00515	0.949	-5.4	-3.3	1809	10	1763	15	1724	25
TGR_201	TGR_201_47	188	61	0	94103	0.11205	0.00057	4.69678	0.0788	0.304023	0.004861	0.953	-7.6	-5.7	1833	9	1767	14	1711	24
TGR_201	TGR_201_73	149	49.7	0	22579	0.11435	0.0006	4.9948	0.08615	0.316798	0.005207	0.953	-5.8	-4	1870	9	1818	15	1774	25
TGR_201	TGR_201_44	143	53.4	0	13431	0.12219	0.00063	5.78217	0.10365	0.343214	0.005888	0.957	-5	-3.2	1988	9	1944	16	1902	28
TGR_201	TGR_201_76	26	10	0	7059	0.13085	0.00079	6.47552	0.12669	0.358926	0.006678	0.951	-7.3	-5.3	2109	10	2043	17	1977	32
TGR_201	TGR_201_53	231	124.2	0	41843	0.18591	0.00128	12.1083	0.28751	0.472364	0.010734	0.957	-9.5	-7.5	2706	11	2613	22	2494	47
TGR_201	TGR_201_12	98	50.8	0	26435	0.18717	0.00294	12.4719	0.29163	0.483269	0.008365	0.74	-7.8	-4.1	2717	25	2641	22	2541	36
TGR_201	TGR_201_114	77	40.6	0	13210	0.19685	0.00122	13.9634	0.47158	0.514457	0.017081	0.983	-5.4	-3.7	2800	10	2747	32	2676	73
TGR_201	TGR_201_18	87	51.8	0	20091	0.22866	0.0042	17.6	0.46932	0.55707	0.010808	0.726	-7.6	-3.6	3043	28	2966	26	2855	45
TGR_201	TGR_201_57	445	34.4	0	15285	0.05575	0.00024	0.60382	0.00742	0.078555	0.000905	0.937	10.6	5.2	442	9	480	5	487	5
TGR_201	TGR_201_117	872	78.3	0	23532	0.05699	0.00024	0.72578	0.01297	0.092358	0.001604	0.972	16.6	10.6	491	9	554	8	569	9
TGR_201	TGR_201_42	1159	107.9	0	23948	0.05731	0.00022	0.73366	0.01102	0.092844	0.001348	0.967	14.3	9.2	504	8	559	6	572	8
TGR_201	TGR_201_60	252	19.8	0	6985	0.05863	0.0003	0.64996	0.00843	0.080398	0.000957	0.917	-10.3	-5.8	554	11	508	5	498	6
TGR_201	TGR_201_45	1315	108.8	0	3514	0.05988	0.00026	0.68809	0.00845	0.083346	0.000957	0.934	-14.4	-11	599	9	532	5	516	6
TGR_201	TGR_201_71	165	13	0	29280	0.06127	0.0012	0.68482	0.01673	0.081066	0.001175	0.594	-23.4	-10.2	649	40	530	10	502	7
TGR_201	TGR_201_69	455	42.6	0	18006	0.06433	0.0004	0.84587	0.01162	0.095365	0.001166	0.889	-23	-19.5	752	13	622	6	587	7
TGR_201	TGR_201_127	263	34	0	10909	0.0706	0.00054	1.34029	0.03882	0.137688	0.003849	0.965	-12.9	-8.7	946	15	863	17	832	22
TGR_201	TGR_201_37	358	29.8	0	1559	0.07847	0.00175	0.89942	0.02353	0.083133	0.001138	0.523	-57.8	-53.6	1159	43	651	13	515	7
TGR_201	TGR_201_92	476	65.1	0	41306	0.08295	0.0003	1.80519	0.02475	0.157836	0.002085	0.963	-27.4	-26.1	1268	7	1047	9	945	12
TGR_201	TGR_201_87	415	77.6	0	31516	0.08954	0.0005	2.32953	0.03684	0.188694	0.002794	0.936	-23.2	-21.2	1416	10	1221	11	1114	15
TGR_201	TGR_201_115	103	17.6	0	23067	0.09866	0.00149	2.60257	0.11521	0.191315	0.007962	0.94	-32	-27.7	1599	27	1301	32	1128	43
TGR_201	TGR_201_21	548	154.8	0	45996	0.11785	0.00137	4.46866	0.07822	0.275009	0.003595	0.747	-20.9	-18	1924	21	1725	15	1566	18
TGR_201	TGR_201_68	250	36	0	6359	0.11905	0.00183	2.42923	0.06841	0.147992	0.003492	0.838	-57.9	-55.7	1942	26	1251	20	890	20
TGR_201	TGR_201_101	44	7.1	0	367	0.12335	0.00085	3.20001	0.04515	0.18815	0.002319	0.873	-48.4	-47.2	2005	12	1457	11	1111	13
TGR_201	TGR_201_120	925	110.6	0	40082	0.12526	0.0025	2.15781	0.06854	0.124938	0.003088	0.778	-66.3	-64.2	2032	34	1168	22	759	18
TGR_201	TGR_201_104	1011	163.8	0	2547	0.13359	0.00097	3.45118	0.06632	0.187364	0.003331	0.925	-52.6	-51.4	2146	13	1516	15	1107	18
TGR_201	TGR_201_62	36	16.4	0	6631	0.1631	0.00105	9.33302	0.19707	0.41502	0.008346	0.952	-11.9	-10.1	2488	11	2371	19	2238	38
TGR_201	TGR_201_59	268	127.5	0	55413	0.17132	0.00137	10.3431	0.23616	0.437875	0.009365	0.937	-10.6	-8.4	2571	12	2466	21	2341	42
TGR_201	TGR_201_106	143	52.3	0	11248	0.1741	0.00099	9.41137	0.17938	0.392069	0.00713	0.954	-21	-19.6	2597	9	2379	17	2132	33
TGR_201	TGR_201_80	165	76.8	0	30758	0.17764	0.0012	10.528	0.23184	0.429827	0.009005	0.951	-14.7	-12.9	2631	11	2482	20	2305	41
TGR_201	TGR_201_119	57	25.8	0	5758	0.17875	0.00099	11.1173	0.33218	0.45108	0.013243	0.983	-10.9	-9.5	2641	9	2533	28	2400	59
TGR_201	TGR_201_93	411	141.7	0	24544	0.17886	0.00081	9.09208	0.16315	0.368669	0.006404	0.968	-27.2	-26.2	2642	7	2347	16	2023	30
TGR_201	TGR_201_32	25	11.3	0	6171	0.18328	0.00286	10.9452	0.25215	0.433119	0.007348	0.736	-16.1	-12.7	2683	26	2518	21	2320	33
TGR_201	TGR_201_84	77	26.4	0	17393	0.18478	0.0014	8.40307	0.17008	0.329831	0.006194	0.928	-36.5	-35	2696	12	2276	18	1838	30
TGR_201	TGR_201_55	233	123	0	106490	0.18582	0.00128	11.947	0.28081	0.46629	0.010478	0.956	-10.6	-8.7	2706	11	2600	22	2467	46
TGR_201	TGR_201_96	159	71.5	0	69441	0.18655	0.00087	11.9123	0.25586	0.463123	0.00971	0.976	-11.5	-10.2	2712	7	2598	20	2453	43
TGR_201	TGR_201_56	69	31	0	10934	0.18734	0.00132	10.5155	0.22066	0.407096	0.008049	0.942	-22.4	-20.7	2719	11	2481	19	2202	37
TGR_201	TGR_201_43	103	55.5	0	18476	0.19172	0.00136	12.5	0.29818	0.472009	0.01077	0.955	-11.6	-9.6	2757	11	2641	22	2492	47
TGR_201	TGR_201_110	107	50.8	0	29215	0.19525	0.00096	13.0841	0.29242	0.486025	0.010595	0.975	-10.1	-8.8	2787	8	2686	21	2553	46
TGR_201	TGR_201_66	43	23.8	0	10430	0.20095	0.00153	13.4381	0.32692	0.485012	0.011209	0.95	-12.2	-10.1	2834	12	2711	23	2549	49
TGR_201	TGR_201_112	498	149.1	0	5168	0.20133	0.0011	8.31561	0.20387	0.299558	0.007161	0.975	-45.8	-44.9	2837	8	2266	22	1689	36
TGR_201	TGR_201_111	122	58.5	0	23208	0.20325	0.00123	13.8053	0.30858	0.492618	0.0106	0.963	-11.5	-9.9	2852	9	2736	21	2582	46
TGR_201	TGR_201_94	97	44.7	0	21453	0.20451	0.00106	13.2186	0.28911	0.468787	0.009961	0.972	-16.1	-14.9	2863	8	2695	21	2478	44
TGR_201	TGR_201_46	185	76.8	0	23933	0.22774	0.00211	12.4343	0.36758	0.395986	0.011117	0.95	-34.2	-32.4	3036	14	2638	28	2151	51
TGR_201	TGR_201_91	65	36.2	0	12961	0.25698	0.0016	19.3589	0.50887	0.546371	0.013955	0.972	-15.9	-14.5	3228	9	3060	25	2810	58
TGR_201	TGR_201_81	223	137.6	0	8394	0.3781	0.00473	28.1039	0.81952	0.539092	0.0142	0.903	-33.4	-31.3	3824	18	3423	29	2780	59
14BD_48	14BD_48_109	1199	102.4	0	43889	0.05668	0.00032	0.61616	0.01003	0.078845	0.001202	0.936	2.2	.	479	12	487	6	489	7
14BD_48	14BD_48_90	75	6.6	0	2180	0.05667	0.00037	0.5892	0.00754	0.075403	0.000832	0.862	-2.2	.	479	14	470	5	469	5
14BD_48	14BD_48_144	548	48.6	0	21898	0.05676	0.0002	0.62994	0.01124	0.080486	0.001406	0.98	3.6	.	482	8	496	7	499	8
14BD_48	14BD_48_137	373	31	0	60046	0.05684	0.00036	0.59057	0.01097	0.07535	0.001315	0.94	-3.7	.	485	13	471	7	468	8
14BD_48	14BD_48_45	949	79.6	0	17017	0.05698	0.0003	0.60896	0.00699	0.077508	0.000793	0.89	-2	.	491	11	483	4	481	5
14BD_48	14BD_48_147	555	48.3	0	102333	0.0572	0.00021	0.62544	0.01024	0.079299	0.001267	0.976	-1.6	.	499	7	493	6	492	8
14BD_48	14BD_48_189	608	45.9	0	22304	0.05736	0.00039	0.62672	0.00865	0.079246	0.000952	0.87	-2.8	.	505	15	494	5	492	6
14BD_48	14BD_48_190	183	27.9	0	37695	0.07173	0.00053	1.55993	0.02449	0.157731	0.002183	0.881	-3.7	.	978	14	954	10	944	12
14BD_48	14BD_48_119	199	36.3	0	27269	0.07256	0.00049	1.65788	0.03438	0.165707	0.003253	0.947	-1.4	.	1002	13	993	13	988	18
14BD_48	14BD_48_188	368	63.3	0	17297	0.07279	0.00053	1.77879	0.02612	0.177232	0.002264	0.87	4.7	0.5	1008	15	1038	10	1052	12
14BD_48	14BD_48_123	259	49.4	0	14549	0.07439	0.00046	1.7755	0.03243	0.173109	0.002971	0.94	-2.3	.	1052	12	1037	12	1029	16
14BD_48	14BD_48_50	87	16.5	0	29251	0.07455	0.00045	1.78121	0.02014	0.173278	0.001657	0.846	-2.7	.	1057	12	1039	7	1030	9
14BD_48	14BD_48_152	53	10.2	0	5278	0.07459	0.00035	1.75472	0.03394	0.170622	0.003202	0.97	-4.3	-1.7	1057	9	1029	13	1016	18
14BD_48	14BD_48_79	125	24.1	0	7408	0.07511	0.0005	1.79813	0.02269	0.173619	0.001856	0.847	-4	-0.6	1072	13	1045	8	1032	10
14BD_48	14BD_48_154	244	49.1	0	15149	0.07523	0.00029	1.84963	0.03446	0.178308	0.003251	0.979	-1.7	.	1075	8	1063	12	1058	18
14BD_48	14BD_48_95	230	49.8	0	22155	0.07534	0.00034	1.84973	0.0232	0.178068	0.002084	0.933	-2.1	.	1078	8	1063	8	1056	11
14BD_48	14BD_48_56	211	41.2	0	11938	0.07538	0.00047	1.83924	0.02114	0.176969	0.001716	0.844	-2.8	.	1079	12	1060	8	1050	9
14BD_48	14BD_48_133	361	78.8	0	27775	0.07781	0.0005	2.08744	0.04214	0.194565	0.003722	0.948	0.4	.	1142	12	1145	14	1146	20
14BD_48	14BD_48_172	149	31.3	0	15269	0.07819	0.00034	2.00631	0.04003	0.186092	0.003625	0.976	-4.9	-2.7	1152	8	1118	14	1100	20
14BD_48	14BD_48_43	55	11.4	0	4527	0.0783	0.00062	2.01995	0.02587	0.187099	0.001878	0.784	-4.6	-1.1	1155	15	1122	9	1106	10
14BD_48	14BD_48_87	61	13.9	0	3637	0.07848	0.00046	2.03388	0.02719	0.18797	0.002264	0.901	-4.6	-1.7	1159	11	1127	9	1110	12
14BD_48	14BD_48_125	324	69.8	0	23880	0.07857	0.00049	2.11207	0.0399	0.19496	0.003478	0.944	-1.2	.	1161	12	1153	13	1148	19
14BD_48	14BD_48_94	112	26.2	0	8124	0.07921	0.00038	2.10149	0.02707	0.192428	0.002299	0.928	-4	-1.6	1177	9	1149	9	1135	12
14BD_48	14BD_48_132	75	16.5	0	3948	0.08052	0.00057	2.18185	0.04604	0.196532	0.003911	0.943	-4.8	-1.3	1210	13	1175	15	1157	21
14BD_48	14BD_48_73	207	52.2	0	29127	0.08257	0.00038	2.33672	0.02888	0.20525	0.002356	0.929	-4.8	-2.7	1259	9	1224	9	1203	13
14BD_48	14BD_48_192	94	20.7	0	7163	0.08545	0.00069	2.64236	0.04232	0.224281	0.003106	0.865	-1.8	.	1326	16	1313	12	1304	16
14BD_48	14BD_48_120	104	26.6	0	15707	0.08698	0.00059	2.75389	0.05647	0.229618	0.004446	0.944	-2.2	.	1360	12	1343	15	1332	23
14BD_48	14BD_48_149	443	122.2	0	41799	0.08777	0.00034	2.9	0.05877	0.239151	0.004769	0.982	0.4	.	1377	7	1380	15	1382	25
14BD_48	14BD_48_104	58	17	0	5518	0.08958	0.00055	2.91861	0.04292	0.236293	0.003156	0.908	-3.9	-1.2	1417	11	1387	11	1367	16
14BD_48	14BD_48_103	518	160	0	32428	0.09053	0.00046	3.11473	0.04442	0.249531	0.003326	0.935	-0.1	.	1437	9	1436	11	1436	17
14BD_48	14BD_48_181	187	51.7	0	20723	0.10032	0.0008	3.85424	0.0665	0.278651	0.004263	0.887	-3.1	.	1630	14	1604	14	1585	21
14BD_48	14BD_48_122	66	23.6	0	9000	0.1105	0.00082	4.8	0.11403	0.315755	0.007105	0.949	-2.4	.	1808	13	1787	20	1769	35
14BD_48	14BD_48_110	54	19.9	0	6688	0.11469	0.00087	5.14639	0.11716	0.325436	0.006986	0.943	-3.6	-0.8	1875	13	1844	19	1816	34
14BD_48	Plot_data	123	47.7	0	29553	0.11494	0.00087	5.35772	0.08794	0.338077	0.004929	0.888	-0.1	.	1879	13	1878	14	1877	24
14BD_48	14BD_48_121	195	73	0	14347	0.11556	0.00087	5.21493	0.12502	0.327308	0.007452	0.95	-3.8	-1.1	1889	13	1855	20	1825	36
14BD_48	14BD_48_93	169	73.5	0	17688	0.11972	0.00063	5.60523	0.09183	0.339566	0.005267	0.947	-4	-2.1	1952	9	1917	14	1885	25
14BD_48	14BD_48_164	438	38.2	0	12469	0.05643	0.00021	0.61991	0.01055	0.079676	0.001324	0.976	5.5	0.4	469	8	490	7	494	8
14BD_48	14BD_48_100	1202	117.3	0	30217	0.05676	0.00026	0.64618	0.00819	0.082566	0.000978	0.935	6.3	1.2	482	10	506	5	511	6
14BD_48	14BD_48_38	60	4.8	0	2439	0.05687	0.00046	0.57865	0.00736	0.073792	0.000728	0.775	-5.9	.	487	16	464	5	459	4
14BD_48	14BD_48_167	26	4.8	0	3552	0.07405	0.0005	1.70062	0.03565	0.166561	0.003304	0.946	-5.1	-1.4	1043	14	1009	13	993	18
14BD_48	14BD_48_62	134	24.7	0	7939	0.07426	0.0005	1.71573	0.0246	0.167567	0.002127	0.885	-5.1	-1.7	1049	13	1014	9	999	12
14BD_48	14BD_48_80	43	9.2	0	8124	0.07634	0.00047	1.85797	0.02525	0.176524	0.002144	0.893	-5.5	-2.4	1104	12	1066	9	1048	12
14BD_48	14BD_48_169	30	6.3	0	2455	0.07873	0.00051	2.00473	0.04283	0.184675	0.003759	0.953	-6.8	-3.6	1165	12	1117	14	1092	20
14BD_48	14BD_48_81	103	24.2	0	11307	0.08064	0.00056	2.1	0.0288	0.19153	0.002223	0.858	-7.5	-4.4	1213	13	1158	9	1130	12
14BD_48	14BD_48_176	354	80.4	0	24032	0.08388	0.00033	2.31852	0.04984	0.200471	0.004236	0.983	-9.5	-7.8	1290	7	1218	15	1178	23
14BD_48	14BD_48_71	110	30.9	0	8952	0.08834	0.00042	2.76786	0.03651	0.227229	0.002792	0.931	-5.6	-3.5	1390	9	1347	10	1320	15
14BD_48	14BD_48_174	94	24.2	0	10624	0.08835	0.00038	2.74838	0.05915	0.22561	0.004757	0.98	-6.3	-4.4	1390	8	1342	16	1311	25
14BD_48	14BD_48_78	195	67.8	0	122816	0.10142	0.00049	3.85584	0.05398	0.27574	0.003626	0.939	-5.5	-3.6	1650	9	1604	11	1570	18
14BD_48	14BD_48_41	429	134	0	70556	0.10454	0.00066	3.99565	0.05235	0.277202	0.003185	0.877	-8.5	-6.3	1706	11	1633	11	1577	16
14BD_48	14BD_48_75	311	113.8	0	32283	0.1066	0.00051	4.24993	0.06177	0.289163	0.003965	0.943	-6.8	-5	1742	9	1684	12	1637	20
14BD_48	14BD_48_146	77	27.1	0	8767	0.11033	0.00052	4.5378	0.10275	0.298296	0.006607	0.978	-7.7	-6	1805	8	1738	19	1683	33
14BD_48	14BD_48_183	541	160.8	0	12527	0.11176	0.00093	4.59384	0.08667	0.298108	0.005044	0.897	-9.1	-6.2	1828	15	1748	16	1682	25
14BD_48	14BD_48_58	275	97.8	0	36698	0.11322	0.0009	4.88338	0.07265	0.31283	0.003941	0.847	-6	-3.3	1852	14	1799	13	1755	19
14BD_48	14BD_48_48	380	135.1	0	44831	0.11558	0.00075	4.99926	0.06918	0.313718	0.003834	0.883	-7.9	-5.7	1889	11	1819	12	1759	19
14BD_48	14BD_48_35	192	84.8	0	46879	0.14273	0.00106	7.57431	0.1176	0.384886	0.005246	0.878	-8.4	-6.1	2261	12	2182	14	2099	24
14BD_48	14BD_48_115	95	55.2	0	76675	0.19562	0.00199	13.6	0.42065	0.502603	0.01473	0.944	-7.2	-4.3	2790	16	2719	29	2625	63
14BD_48	14BD_48_114	352	199.5	0	48334	0.1962	0.00201	13.269	0.40985	0.490508	0.014297	0.944	-9.6	-6.8	2795	16	2699	29	2573	62
14BD_48	14BD_48_179	75	39.5	0	22011	0.20219	0.00256	14.1	0.37122	0.504554	0.011677	0.877	-9	-5.7	2844	21	2754	25	2633	50
14BD_48	14BD_48_111	78	47	0	16475	0.20286	0.0021	14.5773	0.46093	0.52117	0.015571	0.945	-6.2	-3.3	2849	15	2788	30	2704	66
14BD_48	14BD_48_77	1540	135.7	0	13520	0.05895	0.00053	0.65829	0.00885	0.080988	0.000814	0.748	-11.6	-4.5	565	19	514	5	502	5
14BD_48	14BD_48_33	158	12	0	3954	0.06549	0.00044	0.63639	0.00669	0.070478	0.000567	0.765	-45.9	-43.6	790	14	500	4	439	3
14BD_48	14BD_48_67	865	75	0	1517	0.06742	0.00101	0.74183	0.01296	0.079799	0.000721	0.517	-43.4	-38.1	851	30	563	8	495	4
14BD_48	14BD_48_99	574	109.2	0	7851	0.07402	0.00036	1.60649	0.02073	0.157411	0.001884	0.928	-10.3	-7.8	1042	10	973	8	942	10
14BD_48	14BD_48_191	649	75.6	0	2370	0.07416	0.00063	1.26787	0.02548	0.123997	0.00226	0.907	-29.6	-26.2	1046	16	831	11	754	13
14BD_48	14BD_48_134	1034	125.8	0	3325	0.0868	0.00058	1.31301	0.02609	0.10971	0.002055	0.943	-53.1	-51.7	1356	12	851	11	671	12
14BD_48	14BD_48_72_2	193	49.6	0	14864	0.09009	0.00044	2.59821	0.03986	0.209162	0.003042	0.948	-15.6	-13.7	1428	9	1300	11	1224	16
14BD_48	14BD_48_157	353	94.1	0	22730	0.09702	0.0004	3.10982	0.06624	0.232484	0.004857	0.981	-15.5	-14.1	1568	8	1435	16	1348	25
14BD_48	14BD_48_55	653	120.6	0	37329	0.10153	0.00079	2.37714	0.04173	0.169815	0.002675	0.897	-41.9	-40.1	1652	14	1236	13	1011	15
14BD_48	14BD_48_47	1394	155.1	0	1360	0.104	0.00174	1.45017	0.04882	0.101127	0.002953	0.867	-66.4	-64.2	1697	30	910	20	621	17
14BD_48	14BD_48_151	225	65.5	0	17029	0.1088	0.00048	3.79085	0.08156	0.252693	0.005321	0.979	-20.5	-19.2	1779	8	1591	17	1452	27
14BD_48	14BD_48_136	653	73.4	0	974	0.10944	0.00091	1.54037	0.03188	0.102081	0.001933	0.915	-68.1	-67.1	1790	15	947	13	627	11
14BD_48	14BD_48_177	525	171.2	0	31380	0.1095	0.00051	4.20634	0.11428	0.278608	0.007458	0.985	-13	-11.5	1791	8	1675	22	1584	38
14BD_48	14BD_48_60	278	93.3	0	14625	0.11187	0.00079	4.55597	0.06472	0.295374	0.003636	0.867	-10	-7.7	1830	13	1741	12	1668	18
14BD_48	14BD_48_112	385	127	0	23694	0.11497	0.00083	4.69065	0.1016	0.295905	0.00604	0.942	-12.6	-10.2	1879	12	1766	18	1671	30
14BD_48	14BD_48_139	330	117.7	0	183800	0.11662	0.00051	4.86814	0.11356	0.302748	0.006937	0.982	-11.9	-10.6	1905	8	1797	20	1705	34
14BD_48	14BD_48_185	381	93.9	0	5699	0.11859	0.00105	4.10698	0.07718	0.25117	0.004168	0.883	-28.3	-26	1935	16	1656	15	1445	21
14BD_48	14BD_48_70	146	46.5	0	17200	0.12067	0.00091	4.68295	0.06841	0.281453	0.003514	0.855	-21.1	-19	1966	13	1764	12	1599	18
14BD_48	14BD_48_173	1174	133.3	0	783	0.12082	0.00065	1.71519	0.03359	0.102962	0.001939	0.961	-71.2	-70.6	1968	9	1014	13	632	11
14BD_48	14BD_48_40	115	44.9	0	33443	0.13368	0.00187	6.37602	0.13982	0.345917	0.005834	0.769	-12.5	-8.8	2147	24	2029	19	1915	28
14BD_48	14BD_48_141	555	110.3	0	3109	0.14322	0.00109	3.49994	0.07345	0.177236	0.003469	0.933	-57.9	-56.9	2267	13	1527	17	1052	19
14BD_48	14BD_48_36	93	39	0	23484	0.14497	0.0014	7.3954	0.133	0.369988	0.005621	0.845	-13.1	-10.5	2287	16	2160	16	2029	26
14BD_48	14BD_48_37	1025	247.1	0	2227	0.15184	0.00128	4.54109	0.07646	0.216908	0.003163	0.866	-51.1	-49.8	2367	13	1739	14	1266	17
14BD_48	14BD_48_163	370	81.9	0	7671	0.1521	0.00176	4.1	0.11458	0.197419	0.004965	0.909	-55.6	-53.9	2370	20	1662	23	1161	27
14BD_48	14BD_48_44	175	63.5	0	25500	0.15337	0.00131	6.77225	0.13219	0.320243	0.005616	0.898	-28.4	-26.5	2384	14	2082	17	1791	27
14BD_48	14BD_48_51	781	198.5	0	3416	0.16373	0.00154	5.2	0.11895	0.228257	0.00481	0.913	-51.7	-50.2	2495	15	1845	20	1325	25
14BD_48	14BD_48_160	109	54.1	0	17787	0.1757	0.00107	9.88943	0.29301	0.408231	0.011838	0.979	-18.3	-16.8	2613	10	2425	27	2207	54
14BD_48	14BD_48_57	611	174.6	0	2357	0.1772	0.00168	6.2187	0.09539	0.254528	0.003065	0.785	-49.4	-48.1	2627	15	2007	13	1462	16
14BD_48	14BD_48_158	30	16.1	0	5852	0.17751	0.00102	10.6809	0.33093	0.43641	0.013289	0.983	-13.4	-11.9	2630	9	2496	29	2335	60
14BD_48	14BD_48_69	531	164.2	0	1534	0.17788	0.00233	6.75598	0.23833	0.275462	0.009024	0.929	-45.4	-43.2	2633	21	2080	31	1568	46
14BD_48	14BD_48_187	442	88.8	0	1706	0.1783	0.00211	5.08727	0.10351	0.20694	0.003429	0.814	-59.1	-57.7	2637	20	1834	17	1212	18
14BD_48	14BD_48_178	329	130.2	0	2796	0.17842	0.00111	8.12687	0.26189	0.330344	0.010446	0.981	-34.7	-33.5	2638	10	2245	29	1840	51
14BD_48	14BD_48_85	378	141.1	0	42938	0.17883	0.00143	7.33756	0.17126	0.29758	0.006526	0.94	-41.3	-39.8	2642	13	2153	21	1679	32
14BD_48	14BD_48_142	159	89.6	0	28505	0.17897	0.00093	11.1271	0.34255	0.450913	0.013682	0.986	-11	-9.7	2643	8	2534	29	2399	61
14BD_48	14BD_48_113	112	54.1	0	10342	0.1789	0.00173	10.4728	0.28734	0.424577	0.010899	0.936	-16.2	-13.7	2643	16	2478	25	2281	49
14BD_48	14BD_48_89	29	16.7	0	4385	0.18028	0.00127	10.8628	0.22625	0.437013	0.008562	0.941	-14.3	-12.4	2655	11	2511	19	2337	38
14BD_48	14BD_48_117	148	77.1	0	29912	0.18092	0.00174	11.2759	0.32593	0.452031	0.012321	0.943	-11.6	-8.9	2661	15	2546	27	2404	55
14BD_48	14BD_48_34	157	67.4	0	16354	0.18087	0.00175	9.58517	0.27273	0.384364	0.010287	0.941	-24.8	-22.5	2661	16	2396	26	2097	48
14BD_48	14BD_48_145	366	141.1	0	1274	0.18086	0.00114	8.09971	0.20026	0.324814	0.007764	0.967	-36.4	-35.2	2661	10	2242	22	1813	38
14BD_48	14BD_48_159	517	179.8	0	4409	0.18185	0.00114	7.39778	0.2018	0.295051	0.007834	0.973	-42.5	-41.4	2670	10	2161	24	1667	39
14BD_48	14BD_48_171	323	181.2	0	60215	0.18302	0.00102	11.4066	0.35843	0.452016	0.01398	0.984	-12.3	-10.9	2680	9	2557	29	2404	62
14BD_48	14BD_48_105	115	72.2	0	26859	0.18339	0.0014	11.7115	0.25209	0.463155	0.009319	0.935	-10.3	-8.2	2684	12	2582	20	2453	41
14BD_48	14BD_48_162	218	75.1	0	4827	0.18683	0.00106	7.57684	0.18715	0.294134	0.00707	0.973	-43.8	-42.9	2714	9	2182	22	1662	35
14BD_48	14BD_48_68	378	89	0	2505	0.18814	0.00189	5.49081	0.08632	0.211664	0.002556	0.768	-59.8	-58.7	2726	16	1899	14	1238	14
14BD_48	14BD_48_182	257	123.7	0	41225	0.19039	0.00226	12.3224	0.31664	0.469417	0.0107	0.887	-11.6	-8.5	2745	19	2629	24	2481	47
14BD_48	14BD_48_150	138	74.5	0	158368	0.19279	0.00116	11.5875	0.3509	0.435926	0.012938	0.98	-18.6	-17.2	2766	10	2572	28	2332	58
14BD_48	14BD_48_168	76	44.5	0	25481	0.19316	0.00114	12.4511	0.40827	0.467504	0.015077	0.984	-12.9	-11.4	2769	9	2639	31	2473	66
14BD_48	14BD_48_127	286	141.4	0	19899	0.19337	0.00197	11.4549	0.38187	0.429632	0.013641	0.952	-20	-17.5	2771	15	2561	31	2304	62
14BD_48	14BD_48_135	62	31.7	0	13413	0.19551	0.002	11.7968	0.35704	0.437616	0.012465	0.941	-19.2	-16.7	2789	16	2588	28	2340	56
14BD_48	14BD_48_54	60	34.4	0	11314	0.19633	0.002	13.2	0.25493	0.486093	0.008008	0.85	-10.5	-7.9	2796	16	2691	18	2554	35
14BD_48	14BD_48_98	84	53.1	0	49947	0.19686	0.00159	12.6802	0.27604	0.467162	0.009449	0.929	-14.1	-12	2800	13	2656	20	2471	42
14BD_48	14BD_48_97	183	101.3	0	21226	0.20246	0.00173	11.6	0.2424	0.416612	0.00792	0.912	-24.9	-23	2846	13	2575	19	2245	36
14BD_48	14BD_48_107	260	112.3	0	2922	0.20794	0.00224	10.934	0.28692	0.38136	0.009129	0.912	-32.6	-30.4	2890	16	2518	24	2083	43
14BD_48	14BD_48_65	366	117	0	30763	0.21638	0.0025	8.43518	0.16501	0.282732	0.004463	0.807	-51.4	-49.9	2954	18	2279	18	1605	22
14BD_48	excluded14BD_48_3	609	128.9	0	2267	0.1732	0.00209	5.54671	0.16332	0.232263	0.006241	0.913	-53	-51.2	2589	19	1908	25	1346	33
14BD_48	excluded14BD_48_4	1708	165.9	0	60	0.27499	0.00552	4.10749	0.12883	0.108334	0.002611	0.768	-84	-83.2	3335	30	1656	26	663	15
14BD_48	excluded14BD_48_1	297	45.6	0	98381	0.07312	0.00037	1.70634	0.04115	0.169248	0.003989	0.977	-1	.	1017	10	1011	15	1008	22
14BD_48	excluded14BD_48_5	1083	114.9	0	1333	0.12192	0.00095	1.99949	0.04804	0.118945	0.002702	0.946	-67	-66.1	1984	13	1115	16	724	16
14BD_48	excluded14BD_48_6	434	90.9	0	24055	0.1087	0.00064	3.41804	0.09162	0.228065	0.005964	0.976	-28.2	-26.5	1778	10	1509	21	1324	31
14BD_48	excluded14BD_48_8	395	55	0	23828	0.0698	0.00037	1.48187	0.03496	0.153986	0.003542	0.975	0.1	.	922	10	923	14	923	20
14BD_48	excluded14BD_48_9	272	49.4	0	14414	0.08044	0.00044	2.2	0.05429	0.198777	0.004773	0.975	-3.5	-0.8	1208	11	1182	17	1169	26
14BD_48	excluded14BD_48_11	409	70.5	0	19450	0.07782	0.00041	2.03127	0.04971	0.189318	0.004523	0.976	-2.3	.	1142	10	1126	17	1118	25
14BD_48	excluded14BD_48_12	458	156.2	0	11076	0.1783	0.00141	8.7976	0.28978	0.357853	0.011444	0.971	-29.2	-27.5	2637	13	2317	30	1972	54
14BD_48	excluded14BD_48_14	352	23.6	0	15862	0.05605	0.00033	0.58535	0.01294	0.07574	0.001616	0.965	3.7	.	454	13	468	8	471	10
14BD_48	excluded14BD_48_16	357	25.9	0	1343	0.06706	0.00061	0.75132	0.01801	0.081257	0.001802	0.925	-41.6	-37.9	840	19	569	10	504	11
14BD_48	excluded14BD_48_18	128	37.2	0	20616	0.11125	0.00068	4.75217	0.14433	0.30982	0.009215	0.979	-5	-2.8	1820	11	1776	25	1740	45
14BD_48	excluded14BD_48_20	244	49.7	0	27398	0.08626	0.00049	2.64256	0.07161	0.222195	0.005888	0.978	-4.1	-1.6	1344	11	1313	20	1293	31
14BD_48	excluded14BD_48_21	60	9.5	0	4042	0.0752	0.00046	1.81231	0.0461	0.174779	0.004314	0.97	-3.6	-0.2	1074	12	1050	17	1038	24
14BD_48	excluded14BD_48_22	69	31.9	0	17133	0.18509	0.00153	12	0.48564	0.468708	0.018629	0.979	-9.9	-7.6	2699	13	2601	38	2478	82
14BD_48	excluded14BD_48_23	968	159.1	0	133083	0.07421	0.00039	1.8455	0.04677	0.180373	0.004474	0.979	2.3	.	1047	10	1062	17	1069	24
14BD_48	excluded14BD_48_26	153	71.8	0	44911	0.18645	0.00153	12.2104	0.50415	0.474959	0.019217	0.98	-9.2	-6.9	2711	13	2621	39	2505	84
14BD_48	excluded14BD_48_30	198	31.7	0	11800	0.07422	0.00042	1.80188	0.04598	0.176089	0.004383	0.975	-0.2	.	1047	11	1046	17	1046	24
14BD_48	excluded14BD_48_31	90	40.4	0	9109	0.18031	0.00393	11.3541	0.51422	0.4567	0.018128	0.876	-10.4	-4.5	2656	35	2553	42	2425	80
14BD_48	excluded14BD_48_32	329	23.2	0	7250	0.05676	0.00032	0.61865	0.01467	0.07905	0.001822	0.972	1.8	.	482	12	489	9	490	11
